1 **Title:** GABARAP membrane conjugation sequesters the FLCN-FNIP tumor suppressor complex  
2 to activate TFEB and lysosomal biogenesis

3 **Authors:** Jonathan M. Goodwin<sup>1\*</sup>, Ward G. Walkup IV<sup>1†</sup>, Kirsty Hooper<sup>2†</sup>, Taoyingnan Li<sup>3,13†</sup>,  
4 Chieko Kishi-Itakura<sup>4</sup>, Aylwin Ng<sup>1</sup>, Timothy Lehmborg<sup>1</sup>, Archana Jha<sup>1</sup>, Sravya Kommineni<sup>1</sup>,  
5 Katherine Fletcher<sup>2</sup>, Jorge Garcia-Fortanet<sup>1</sup>, Yaya Fan<sup>5</sup>, Qing Tang<sup>5</sup>, Menghao Wei<sup>5</sup>, Asmita  
6 Agrawal<sup>6</sup>, Sagar R. Budhe<sup>6</sup>, Sreekanth R. Rouduri<sup>6</sup>, Dan Baird<sup>1</sup>, Jeff Saunders<sup>1</sup>, Janna Kiselar<sup>7</sup>,  
7 Mark R. Chance<sup>7</sup>, Andrea Ballabio<sup>8,9,10,11,12</sup>, Brent A. Appleton<sup>1</sup>, John H. Brumell<sup>3,13,14,15</sup>, Oliver  
8 Florey<sup>2\*^</sup>, and Leon O. Murphy<sup>1^</sup>.

9 **Affiliations:**

- 10 1 Casma Therapeutics, 400 Technology Sq, Cambridge, MA 02139.  
11 2 Signalling Programme, Babraham Institute, Cambridge, UK.  
12 3 Department of Molecular Genetics, University of Toronto, Toronto, ON M5S 1A8, Canada  
13 4 Imaging Facility, Babraham Institute, Cambridge, UK.  
14 5 Viva Biotech, Shanghai, China  
15 6 Sai Life Sciences Limited, Pune – 411057, Maharashtra, India.  
16 7 NEO Proteomics Inc., Cleveland, OH 44106.  
17 8 Telethon Institute of Genetics and Medicine (TIGEM), Naples, Italy.  
18 9 Medical Genetics Unit, Department of Medical and Translational Science, Federico II  
19 University, Naples, Italy.  
20 10 Department of Molecular and Human Genetics, Baylor College of Medicine, Houston,  
21 TX, USA.  
22 11 Jan and Dan Duncan Neurological Research Institute, Texas Children’s Hospital,  
23 Houston, TX, USA.  
24 12 SSM School for Advanced Studies, Federico II University, Naples, Italy.  
25 13 Cell Biology Program, Hospital for Sick Children, Toronto, ON, M5G 1X8, Canada  
26 14 Institute of Medical Science, University of Toronto, Toronto, ON, M5S 1A8, Canada  
27 15 SickKids IBD Centre, Hospital for Sick Children, Toronto, ON, M5G 0A4, Canada  
28

29 †These authors contributed equally to this work.

30 ^Co-senior authors

31 \*Corresponding authors.

32

33 **Adaptive changes in lysosomal capacity are driven by the transcription factors TFEB and**  
34 **TFE3 in response to increased autophagic flux and endolysosomal stress, yet the molecular**

35 **details of their activation are unclear. LC3 and GABARAP members of the ATG8 protein**  
36 **family are required for selective autophagy and sensing perturbation within the**  
37 **endolysosomal system. Here we show that during single membrane ATG8 conjugation**  
38 **(SMAC), Parkin-dependent mitophagy, and *Salmonella*-induced xenophagy, the membrane**  
39 **conjugation of GABARAP , but not LC3, is required for activation of TFEB/TFE3 to**  
40 **control lysosomal homeostasis and capacity. GABARAP directly binds to a novel LC3-**  
41 **interacting motif (LIR) in the FLCN/FNIP tumor suppressor complex with picomolar**  
42 **affinity and regulates its relocalization to these GABARAP-conjugated membrane**  
43 **compartments. This disrupts the regulation of RagC/D by the FLCN/FNIP GAP complex,**  
44 **resulting in impaired mTOR-dependent phosphorylation of TFEB without changing**  
45 **mTOR activity towards other substrates. Thus, the GABARAP-FLCN/FNIP-TFEB axis**  
46 **serves as a universal molecular sensor that coordinates lysosomal homeostasis with**  
47 **perturbations and cargo flux within the autophagy-lysosomal network.**

48

## 49 **Introduction**

50 Within the cell, the proteasome and the lysosome serve as the degradative hubs for both  
51 intracellular and extracellular cargo to maintain proteostasis and cellular fitness<sup>1</sup>. The lysosome  
52 is an acidic organelle that compartmentalizes hydrolytic enzymes capable of degrading complex  
53 organelles, protein aggregates, pathogens, complex lipids, as well as dysfunctional proteins<sup>2</sup>.  
54 Lysosomes can receive cargo from fusion with autophagosomes (macroautophagy), endosomes  
55 (endocytosis), phagosomes (phagocytosis and LC3-associated phagocytosis), engulfment  
56 through lysosomal microautophagy, or through import of proteins during chaperone-mediated  
57 autophagy<sup>3-9</sup>. Within the lysosome, cargo can be broken down and constituents are then recycled

58 to help the cell adapt to stress, or processed to for antigen presentation or lysosomal  
59 exocytosis<sup>4,10,11</sup>. Apart from the enzymatic digestion of proteins and other cargo, lysosomes are  
60 important intracellular stores for cations such as calcium, iron, and sodium but also H<sup>+</sup> protons  
61 which are critical for maintaining lysosomal pH. Ion channels and proton pumps present on the  
62 lysosomal membrane are essential for lysosomal function, positioning, membrane fusion, and  
63 host-pathogen responses<sup>12</sup>.

64 While an important pillar of proteostasis, the lysosome is also a critical regulator of cellular  
65 metabolism. The mechanistic target of rapamycin (mTOR) complex 1 (mTORC1) resides on the  
66 lysosomal membrane and coordinates anabolic processes in response to changes in nutrient  
67 availability<sup>13</sup>. Lysosomal localization of mTORC1 is controlled by a signaling platform  
68 consisting of the vATPase, the Ragulator complex (LAMTOR1-5), and the transmembrane  
69 protein SLC38A9, which together mediates the localization and activation state of the Rag  
70 GTPases<sup>14,15</sup>. Functioning as obligate heterodimers, the GTP-loaded state of RagA/B and  
71 RagC/D is tightly controlled by the GATOR1 and FLCN GTPase-activating complexes,  
72 respectively. Active RagGTPases (where RagA/B is in the GTP-bound state) recruits mTORC1  
73 to the lysosomal membrane and modulates substrate phosphorylation<sup>15</sup>.

74 In addition to regulation of cellular metabolism, mTORC1 exerts effects on the lysosomal  
75 network itself through the regulation of the TFE/MiTF bHLH transcription factor family<sup>16</sup>. The  
76 family members TFE3 and TFEB are well documented as master regulators of lysosomal  
77 biogenesis and autophagy<sup>17-19</sup>. In the case of macroautophagy, which is thought to have evolved  
78 as a stress response to starvation, mTORC1 functions to suppress both autophagosome  
79 biogenesis and TFE3/TFEB activation during nutrient availability. However, upon inhibition of  
80 mTORC1 by nutrient deprivation, increased autophagosome biogenesis is coupled with

81 activation of TFE3/TFEB to drive lysosomal biogenesis and facilitate flux. Importantly, nutrient  
82 deprivation switches nucleotide binding on RagC/D to the GTP-bound state through formation of  
83 the lysosomal folliculin complex (LFC)<sup>20,21</sup>. When GTP-Bound, RagC/D can no longer directly  
84 bind TFE3 and TFEB to present them as substrates to mTOR, a mechanism not required for  
85 other mTOR substrates such as S6K<sup>22</sup>. While this lysosome-to-nucleus signaling mechanism<sup>23</sup> is  
86 documented during nutrient starvation, how TFE3/TFEB activation is coordinated with the  
87 lysosomal delivery pathways mentioned above, as well as specialized forms of selective  
88 autophagy, is unclear.

89 Conjugation of ATG8 homologs (e.g., LC3 and GABARAP proteins) to double membranes  
90 during autophagosome biogenesis mediates phagosome maturation and lysosomal delivery of  
91 cytosolic contents for degradation and recycling<sup>3</sup>. Alternatively, ATG8 proteins can also be  
92 conjugated to single-membrane organelles within the endocytic system, but the functional  
93 consequence of this is not well understood<sup>24</sup>. Single-membrane ATG8 conjugation, referred to  
94 here as SMAC, occurs during LC3-associated phagocytosis (LAP)<sup>6</sup>, LC3-associated endocytosis  
95 (LANDO)<sup>8</sup>, and upon perturbation of endolysosomal ion gradients during pathogen infection<sup>25,26</sup>.  
96 SMAC can be pharmacologically induced by chemical probes that exhibit lysosomotropic and  
97 broad ionophore/protonophore-like properties but unfortunately these agents lack a molecular  
98 target<sup>7</sup>. Recently, it was reported that ATG8 proteins are directly conjugated to the lysosomal  
99 membrane upon disruption of lysosomal homeostasis by agents such as LLoMe, oxalate crystals,  
100 and membrane-permeabilizing pathogen virulence factors<sup>27,28</sup>. This autophagy-independent  
101 ATG8 conjugation was required for the coordinated activation of TFEB, specifically uncoupling  
102 TFEB, but not other substrates, from regulation by mTOR. This prompts the question whether



103 the commonality of ATG8 conjugation across lysosomal delivery pathways serves as a universal  
104 mechanism to coordinate TFE3/TFEB activation.

105 To uncover the novel mechanism by which ATG8 conjugation impacts TFEB activation, we  
106 characterized TRPML1 channel agonists as the first pharmacological probes with a defined  
107 molecular target that can be deployed as SMAC agonists, in contrast to non-specific  
108 ionophore/protonophores<sup>7</sup>. Regulating ATG8 conjugation in this way allowed us to reveal that  
109 GABARAP proteins directly bind and sequester the FLCN GAP complex on different membrane  
110 compartments. This disrupts regulation of RagC/D and liberates TFEB from control by  
111 mTORC1 to coordinate lysosomal biogenesis with organelle perturbations and elevations in  
112 autophagic cargo flux. This represents a TFEB transcriptional activation paradigm distinct from  
113 the setting of nutrient starvation, where broad inhibition of mTOR activity towards downstream  
114 substrates such as S6K and 4E-BP1 results in a concurrent block in protein translation.

115

## 116 **Results**

### 117 **TRPML1 agonists stimulate single membrane ATG8 conjugation (SMAC)**

118 Given the complexity of lysosomal membrane disrupting agents, we chose to acutely alter ion  
119 concentrations within the lysosome by harnessing pharmacological agonists of the lysosomal  
120 transient receptor potential mucolipin channel 1 (TRPML1). Treatment with the TRPML1  
121 agonists MK6-83<sup>29</sup>, ML-SA1<sup>30</sup> or a recently published, more potent channel agonist (designated  
122 as compound 8 “C8”)<sup>31</sup> resulted in the rapid conversion of LC3 from its cytoplasmic “I” form to  
123 the lipidated, punctate “II” form in both wild type (WT) and autophagy-deficient cells  
124 (ATG13\_KO). In contrast, the mTOR inhibitor AZD8055, a well-established agent to induce

125 autophagosome biogenesis<sup>32</sup>, was able to regulate LC3 lipidation in WT but not autophagy-  
126 deficient cells (Fig. 1A, B, Fig. S1A, B, Movie S1, S2). AZD8055 or EBSS starvation induced  
127 conversion of LC3 which was sensitive to the VPS34 inhibitor PIK-III and potentiated with the  
128 vATPase inhibitor Bafilomycin A1 (BafA1) (Fig. 1C). Interestingly, treatment with C8 robustly  
129 induced VPS34-independent LC3 lipidation that was inhibited by BafA1 with no impact on  
130 mTOR activity (Fig. 1C). This rapid lipidation depends on TRPML1 (Fig. S2A) and is not  
131 accompanied by lysosomal alkalization or membrane damage (Fig. S3A, B). Together, these  
132 features are characteristic of SMAC where ATG8s are conjugated to endolysosomal  
133 membranes<sup>33</sup>. Consistent with this, TRPML1 agonist treatment also induced strong  
134 colocalization of ATG8s (LC3B or GABARAPL1) with the lysosomal marker LAMP1 (Fig. 1D-  
135 F).

136 ATG16L1-K490A is a recently discovered allele with a mutation in the C-terminal WD repeats  
137 of ATG16L1 required for SMAC but not autophagosome formation<sup>26</sup>. Expression of ATG16L1-  
138 K490A in autophagy-deficient cells blocked TRPML1 agonist-induced LC3 puncta formation  
139 (Fig. 1G). Using Focused Ion Beam (FIB-SEM) correlative light and electron microscopy  
140 (CLEM), TRPML1 agonist induced GFP-LC3 positive structures were identified as single-  
141 membrane late endosome/lysosomes as opposed to the double-membrane autophagosomes in  
142 AZD8055 treated cells (Fig. 1H, Movie S3, S4).

143 Next, we asked whether TRPML1 activation could induce SMAC in primary immune cells from  
144 a knockin ATG16L1-K490A mouse model. Treatment of ATG16L1<sup>K490A</sup> or ATG16L1<sup>WT</sup>  
145 primary bone marrow-derived macrophages with AZD8055 showed similar levels of LC3  
146 puncta, but C8 or ML-SA1 were unable to induce LC3 puncta in ATG16L1<sup>K490A</sup> expressing cells  
147 (Fig. 1K). Given the sensitivity to BafA1 and requirement of the ATG16L1 C-terminal WD

148 repeats, we explored the role of vATPase in SMAC. We utilized the *S. Typhimurium* SopF  
149 effector protein, which has recently been shown to block interaction between ATG16L1 and the  
150 vATPase through ADP-ribosylation of the V<sub>0</sub>C subunit<sup>25</sup>. Indeed, expression of SopF was  
151 sufficient to block LC3-II formation upon TRPML1 activation but not AZD8055 treatment (Fig.  
152 II, J). Collectively, using genetic, pharmacological and ultrastructural methodologies, these data  
153 provide strong evidence that TRPML1 activation can induce SMAC directly on lysosomes.

154

### 155 **SMAC is required for TFEB activation downstream of TRPML1**

156 The activation of TRPML1 upon nutrient starvation is known to result in the nuclear localization  
157 of the transcription factors TFEB and TFE3, in part due to local calcium-mediated activation of  
158 the phosphatase Calcineurin (CaN) to dephosphorylate TFEB/TFE3<sup>34</sup>. Interestingly, treatment of  
159 fed cells with TRPML1 agonists resulted in TFEB nuclear accumulation, with no impact of  
160 pharmacological or genetic inhibition of CaN (Fig. S4), suggesting a regulatory mechanism that  
161 differs from nutrient starvation<sup>34</sup>. To investigate whether SMAC was involved in TFEB  
162 activation, we focused first on a requirement for the vATPase. Acute treatment with BafA1 was  
163 sufficient to block TFEB activation by TRPML1 agonists, however it did not impact TFEB  
164 activation upon mTOR inhibition (Fig. 2A). Additionally, inhibition of SMAC through  
165 expression of SopF blocked TFEB nuclear localization induced by TRPML1 agonist but not  
166 AZD8055 treatment (Fig. S5). CRISPR mediated knockout of the ATG8 lipidation machinery  
167 such as ATG16L1, ATG5 or ATG7 but not FIP200, ATG9A or VPS34, which are required for  
168 autophagosome biogenesis, blocked TRPML1 agonist induced TFEB activation (Fig. 2B).  
169 Importantly, lysosomal calcium release stimulated by C8 or the activation of TFEB upon nutrient  
170 starvation were insensitive to BafA1 treatment or ATG16L1 knock-out (Fig. 2C, Fig. S6).

171 Consistent with modulation of SMAC by SopF expression, ATG16L1\_KO cells re-expressing  
172 WT or an autophagy deficient ATG16L1 FIP200 binding mutant (FBD) supported TRPML1  
173 induced TFEB activation, while re-expression of a C-terminal domain truncation ( $\Delta$ CTD) or  
174 F467A or K490A mutations deficient for SMAC<sup>26</sup> did not (Fig. 2D, Fig. S7). In contrast,  
175 AZD8055 activated TFEB irrespective of ATG16L1 allele status. Furthermore, treatment of  
176 ATG16L1<sup>K490A</sup> or ATG16L1<sup>WT</sup> primary bone marrow-derived macrophages revealed TRPML1-  
177 mediated TFEB activation was abolished in ATG16L1<sup>K490A</sup> expressing cells (Fig. 2E, F) further  
178 confirming the presence of a novel SMAC-regulated pathway that induces TFEB activity in  
179 diverse cell types. These data suggest that ATG8 conjugation to single membrane organelles can  
180 promote activation of the TFEB/TFE3 transcription factors through a vATPase-dependent,  
181 ATG8-dependent mechanism which is distinct to the regulation of TFEB in the context of  
182 nutrient starvation or mTOR inhibition.

183 Upon nuclear localization, TFEB serves as the primary transcription factor responsible for  
184 lysosomal biogenesis<sup>16</sup>. Remarkably, the TRPML1-dependent transcriptomic response was  
185 largely dependent on ATG16L1 and included numerous TFEB-target genes involved in  
186 lysosomal function (Fig. 2G, H, Fig. S8). Consistent with this profile, we found that TRPML1  
187 activation by treatment with C8 for 24 hours increased the number of LysoTracker-positive  
188 organelles in an ATG16L1-dependent manner (Fig. 2I, J). Together, these observations  
189 demonstrate that following changes in lysosomal ion balance, the WD40 domain in ATG16L1  
190 regulates lysosomal SMAC and that this is required for TFEB activation and lysosomal  
191 biogenesis.

192

193 **GABARAPs selectively bind and sequester the FLCN-FNIP tumor suppressor complex to**  
194 **lysosomes**

195 Mammalian ATG8 homologs consist of 3 members of the MAP1LC3 family (LC3A/B/C) and 3  
196 members of the GABA type A Receptor-Associated Protein family (GABARAP/L1/L2)<sup>35</sup>. Using  
197 a combinatorial CRISPR knockout approach, the GABARAP subfamily were found to be  
198 essential for the TRPML1-mediated activation of TFEB (Fig. 3A). In agreement with protein  
199 interaction databases linking GABARAP, but not LC3 proteins, with the TFEB regulators FLCN  
200 and FNIP1/2<sup>36-38</sup>, we confirmed that the FLCN-FNIP1 complex interacts with GABARAP  
201 through LIR-dependent binding (Fig. 3B-D, Fig. S9). The connection between GABARAP and  
202 the FLCN/FNIP complex was intriguing given the role that the FLCN/FNIP substrate RagC/D  
203 plays in regulating TFEB<sup>39</sup>.

204 We next determined the binding affinity of the interaction between full length GABARAP and  
205 FLCN/FNIP2 by Surface Plasmon Resonance (SPR). GABARAP bound to immobilized  
206 FLCN/FNIP2 with a picomolar affinity in single cycle ( $300 \pm 18$  pM  $K_D$ ) and multi-cycle  
207 kinetics SPR formats ( $71 \pm 10$  pM  $K_D$ ), whereas LC3B did not bind to FLCN/FNIP2 under  
208 identical assay conditions (Fig. 3E, F). To confirm the functionality of the full length LC3B, we  
209 used multi-cycle SPR to measure the affinity of GABARAP and LC3B to immobilized p62 FIR  
210 domain. Both GABARAP ( $670 \pm 80$  nM  $K_D$ ) and LC3B ( $820 \pm 40$  nM  $K_D$ ) bound p62 with  
211 nanomolar affinities in steady state SPR measurements (Fig. 3G-J) which is consistent with  
212 previous reports<sup>40</sup>. Taken together, the specific binding of GABARAP to FLCN/FNIP2, with an  
213 unusually high affinity for an ATG8-binding event, is consistent with the important role  
214 GABARAP plays in regulating TFEB activation described above.

215 We hypothesized direct conjugation of GABARAPs to the lysosomal membrane could re-  
216 distribute the FLCN/FNIP complex. Indeed, following TRPML1 activation, there was a rapid  
217 and robust increase in membrane-associated FLCN and FNIP1 and this was dependent on the  
218 GABARAP proteins and vATPase function (Fig. 3L, Fig. S10). FLCN colocalization with the  
219 lysosomal marker LAMP-1 (Fig. 3K) and its presence on isolated lysosomes was dependent on  
220 GABARAP proteins (Fig. 3N). Lysosomal localization of FLCN also occurs upon nutrient  
221 starvation, where FLCN specifically binds to RagA<sup>GDP</sup> and forms the inhibitory lysosomal  
222 folliculin complex (LFC)<sup>20,21</sup>. However, in cells deficient for the Ragulator complex component  
223 LAMTOR1, which is part of the LFC, TRPML1 activation promoted FLCN membrane  
224 recruitment (Fig. 3M). Additionally, using NPRL2\_KO cells which have constitutive RagA/B<sup>GTP</sup>  
225 and defective lysosomal localization of FLCN upon starvation<sup>41</sup>, we found that the FLCN-FNIP1  
226 complex distributed to membranes following TRPML1 activation (Fig. S11). These data indicate  
227 that the GABARAP-dependent sequestration of FLCN/FNIP1 is a process distinct from LFC  
228 formation.

229 We reasoned that GABARAP-dependent recruitment of FLCN to the lysosome could inhibit its  
230 GAP activity towards RagC/RagD, the heterodimeric partner of RagA/B, analogous to how  
231 lysosomal recruitment inhibits FLCN-FNIP GAP activity during LFC formation<sup>20,21</sup>. In this  
232 model, FLCN-FNIP1 would normally exert its GAP function away from the lysosomal surface,  
233 thus promoting cytosolic RagC/D<sup>GDP</sup> and subsequent TFEB cytosolic retention<sup>22,39</sup>. Indeed,  
234 RagGTPase dimers have been shown to interact dynamically with the lysosome under fed  
235 conditions<sup>42,43</sup>. Using NPRL2\_KO cells mentioned above, additional knockout of FLCN resulted  
236 in complete nuclear localization of TFEB under nutrient rich conditions in both wild type and  
237 LFC-deficient NPRL2\_KO cells, supporting a model where FLCN-FNIP1 GAP activity towards

238 RagC/D can occur outside the context of the LFC (Fig. S12). In a complementary approach, we  
239 artificially tethered FLCN to the lysosomal surface (lyso-FLCN, see methods) and found this  
240 sufficient to activate TFEB and TFE3 in full nutrient conditions without impacting mTOR  
241 signaling to S6K1 (Fig. S13). Additionally, we found that in contrast to nutrient starvation,  
242 TRPML1 agonist treatment retained the ability to activate TFEB in NPRL2\_KO cells, suggesting  
243 intact FLCN GAP activity toward RagGTPases (Fig. S14). However, expression of RagGTPases  
244 locked in the active state (RagB<sup>Q99L</sup>/RagD<sup>S77L</sup>), which are no longer regulated by FLCN-FNIP1,  
245 suppressed the mobility shift of TFEB and its homolog TFE3 following TRPML1 activation but  
246 not with AZD8055 (Fig. S14). Collectively, these data support a model in which the  
247 redistribution of the FLCN-FNIP1 complex to the lysosomal membrane can regulate the  
248 nucleotide binding state of RagC/D, thus resulting in a novel mechanism for TFEB activation.

249

### 250 **A novel LIR domain in FNIP1/2 mediates high affinity GABARAP interaction**

251 Carboxyl group footprinting was employed as an unbiased approach to identify the molecular  
252 interface between GABARAP and the FLCN-FNIP complex<sup>44,45</sup>. This method also leverages the  
253 observation that aspartate and/or glutamate residues are commonly observed upstream of LIR  
254 motifs<sup>40,46</sup>. Analysis of covalent modification by LC-MS revealed three FNIP2 peptides showing  
255 the most significant protection (553-559, 560-573 and 564-573), which span a 21-residue  
256 segment containing a single LIR motif (YVVI) at positions 567-570 (Fig. 4B, Table S5).  
257 Additional peptides with a lower level of protection were observed on FLCN (283-290 and 275-  
258 290) and FNIP2 (286-295 and 331-346) (Table S4), however these lacked an obvious LIR motif  
259 and may reflect potential conformational rearrangements upon complex formation. The putative  
260 FNIP2 LIR motif mapped to a >300-residue disordered loop within FLCN/FNIP2 from the LFC

261 complex that was recently solved by CryoEM<sup>20, 21</sup>. This loop sits within the C shaped  
262 FLCN/FNIP2 cradle at a region distal to the RagA/RagC binding interface (Fig. 4C). Mutation of  
263 the orthologous LIR sequence in FNIP1 from YVLV to AVLA completely blocked GABARAP  
264 interaction with the FLCN-FNIP1 complex, whereas the FNIP1 LIR mutation did not impact its  
265 association with FLCN (Fig. 4D, Fig. S15).

266 We determined the crystal structure of GABARAP in complex with residues 558-576 of FNIP2  
267 at 1.8 Å (Fig. S16, Table S1-S3). Tyr567 and Ile57 comprise the x<sub>0</sub> and x<sub>3</sub> positions of the 4-  
268 residue LIR motif, which occupy the canonical hydrophobic pockets 1 and 2, respectively, on  
269 GABARAP (Fig. 4E). Published co-structures of ATG8 family members often reveal additional  
270 interactions upstream and/or downstream of the LIR motif, which appear to contribute to affinity  
271 and selectivity. On the C-terminal side of the LIR, the GABARAP/FNIP2 co-structure contains a  
272 hydrogen bond between Thr571 (x<sub>4</sub>) and Arg28<sup>GAB</sup>, but no further downstream contacts in  
273 contrast to other reports showing interactions up to (x<sub>10</sub>)<sup>40</sup>. The lack of interaction on the C-  
274 terminal side is not unexpected given the lack of sequence conservation between FNIP1 and  
275 FNIP2 between x<sub>5</sub> and x<sub>10</sub> (Fig. S17).

276 On the N-terminal side of the LIR, GABARAP forms a beta-hairpin loop that contributes a  
277 number of side chain-mediated interactions (Fig. 4E, Fig. S18). In contrast to the C-terminal  
278 side, the N-terminal region is strongly conserved between FNIP1 and FNIP2. Glu558 (x<sub>-9</sub>) and  
279 Glu564 (x<sub>-3</sub>), which were protected by GEE-labeling (Fig. S17), form hydrogen bonds and salt  
280 bridges. Glu558 forms a bidentate engagement with Lys24<sup>GAB</sup> and Gln25<sup>GAB</sup> while Glu564 in  
281 combination with Ser565 (x<sub>-3</sub>) participate in a hydrogen bonding network that includes Tyr5<sup>GAB</sup>,  
282 Glu17<sup>GAB</sup> and Lys48<sup>GAB</sup> (Fig. 4E). Val562 occupies a shallow cleft that involves the  
283 hydrophobic portion of a trio of aliphatic residues.



284 To confirm the importance of the molecular interactions outside the core LIR motif, we  
285 developed a competition SPR assay using isolated FNIP2 peptides. A peptide spanning the LIR  
286 motif in FNIP2 (aa 558-576) was able to fully compete interaction of GABARAP with  
287 FLCN/FNIP2 (Fig. 4G). However, we noted a  $10^4$  lower affinity of our FNIP2 LIR peptide for  
288 GABARAP ( $6.2 \pm 3 \mu\text{M}$ ) than full length FLCN/FNIP2. N-terminal extension of the FNIP2  
289 peptide to incorporate the full stabilized hairpin structure (aa 550-576) showed markedly  
290 increased affinity for GABARAP ( $29 \pm 2 \text{ nM } K_D$ ) in competition SPR. Mutation of the candidate  
291 LIR sequence in the elongated peptide blocked competition with the GABARAP and  
292 FLCN/FNIP2, confirming the role of the LIR motif in driving the interaction between  
293 GABARAP and FLCN/FNIP2 (Fig. 4G).

294 It remains unclear how selectivity is established within the GABARAP and LC3B branches of  
295 the ATG8 family as universal rules have not yet been established for interaction partners. A  
296 comparison of LC3B and GABARAP shows that four of the five residues that form side  
297 chain:side chain-mediated interactions in the X-ray structure are not conserved between LC3B  
298 and GABARAP (Fig. 4H, I). These amino acid differences may contribute to the observed  
299 affinity differences of LC3B and GABARAP for the FLCN/FNIP complex (Fig. 3E).

300

301 **GABARAP sequestration of FLCN-FNIP complex to membranes is required for TFEB**  
302 **activation during SMAC and selective autophagy**

303 To establish the functional requirement of the FNIP LIR domain, we reconstituted FNIP1/2  
304 double knockout cells with WT or LIR-mutant (LIR) FNIP1. Both FNIP1-WT and FNIP1-LIR  
305 were able to rescue the constitutive TFEB activation in FNIP1/2\_DKO cells as evidenced by

306 suppression of GPNMB protein levels (Fig. 5A). TFEB activation upon acute TRPML1  
307 stimulation was blocked specifically in cells expressing FNIP1-LIR, whereas TFEB activation in  
308 response to nutrient starvation was not impacted by FNIP1-LIR (Fig. 5A, B). Upon chronic  
309 treatment with the TRPML1 agonist, the functional TFEB transcriptional response can be  
310 measured by protein levels of the target gene *GPNMB*. GPNMB expression was completely  
311 blocked in FNIP1-LIR mutant cells (Fig. 5C). GPNMB protein levels were also largely  
312 suppressed upon AZD8055 treatment despite robust TFEB activation. This highlights how  
313 concurrent inhibition of protein translation may minimize the effective scope of the TFEB  
314 transcriptional activation (Fig. 5C). ATG8 conjugation was not altered by modulation of FNIP1  
315 (Fig. 5A, C). Membrane sequestration of the FLCN-FNIP complex also required the identified  
316 FNIP1-LIR domain, confirming our hypothesis that GABARAP binding to the FLCN-FNIP  
317 complex is responsible for its relocalization (Fig. 5D). Other inducers of SMAC, such as the  
318 ionophore monensin, could induce FLCN-FNIP1 complex sequestration independently of  
319 TRPML1 (Fig. S19A) and regulated TFEB activation in a FNIP1-LIR domain dependent manner  
320 (Fig. S19B, C). This suggests that perturbation of lysosomal ion homeostasis, rather than  
321 TRPML1 activation specifically, serves as a trigger for GABARAP-dependent FLCN-FNIP  
322 relocalization.

323 It is intriguing to consider that any instance where GABARAP proteins are conjugated to  
324 subcellular membranes might result in TFEB activation via the high affinity sequestration of  
325 FLCN/FNIP. Thus, we examined distinct forms of selective autophagy, mitophagy and  
326 xenophagy. It has been shown that TFEB activation occurs during parkin-dependent  
327 mitophagy<sup>47</sup>, and we found that this required GABARAP proteins (Fig. 6A, B, Fig. S15).  
328 Furthermore, TFEB activation was defective in cells stably expressing LIR-mutant FNIP1,

329 confirming that GABARAP-dependent relocalization of FLCN to mitochondria mechanistically  
330 links TFEB activation to mitophagy (Fig. 6C). Interestingly, an earlier study observed that FLCN  
331 and FNIP could localize to mitochondria upon depolarization<sup>48</sup> and the TFEB activation  
332 mechanism revealed in the current study explains the relevance of this. Importantly, using a  
333 proximity-regulated mitophagy system, where mitophagy is measured using the Keima  
334 fluorescence shift assay<sup>49</sup> (Fig. 6D, E) we confirmed the GABARAP-dependence of TFE3  
335 translocation and FLCN redistribution independent of using mitochondrial uncouplers (Fig. 6F).

336 Finally, we used a *Salmonella* infection model of xenophagy to determine if TFEB activation  
337 was regulated by GABARAP mediated FLCN sequestration. A portion of *Salmonella enterica*  
338 serovar Typhimurium (*S. Typhimurium*) are rapidly targeted by the autophagy machinery and  
339 become decorated with ATG8 homologs<sup>50</sup>. It was recently discovered that *S. Typhimurium*  
340 antagonize the ATG8 response through the bacterial effector SopF<sup>25</sup>. We hypothesized that if  
341 ATG8 proteins were involved in TFEB activation,  $\Delta$ *sopF* *S. Typhimurium* would show a greater  
342 TFEB activation than WT due to increased ATG8 conjugation. Indeed,  $\Delta$ *sopF* *S. Typhimurium*  
343 produced a robust activation of TFEB that occurred in a higher percentage of cells for a longer  
344 duration of time post-infection (Fig. 6G-I). Importantly, TFEB activation was blunted by  
345 deletion of GABARAP family members (RAP\_TKO), but was not impacted by knockout of LC3  
346 isoforms (LC3\_TKO) (Fig. 6J-L). We next examined the localization of FLCN and found a  
347 striking relocalization of FLCN to coat the *S. Typhimurium Salmonella*-containing vacuole  
348 membrane (Fig. 6M). This relocalization required GABARAP proteins, indicating that  
349 GABARAP-dependent sequestration of FLCN to the *Salmonella* vacuoles results in TFEB  
350 activation upon infection (Fig. 6M). Taken together, the mitophagy and xenophagy examples of  
351 selective autophagy highlight that GABARAP-dependent sequestration of FLCN to distinct

352 cellular membranes may serve as a universal mechanism to couple activation of TFE3/TFEB  
353 transcription factors to the initiation of selective autophagy.

354

## 355 **Discussion**

356 We describe a previously unrecognized molecular mechanism orchestrated by GABARAP  
357 proteins independent from their role in substrate degradation and vesicle maturation. Changes in  
358 endolysosomal ion levels and induction of SMAC helped uncover a novel regulatory input to  
359 TFEB nuclear localization that is independent of nutrient status and requires the ATG5-ATG12-  
360 ATG16L1 conjugation machinery. GABARAP-dependent membrane sequestration of the  
361 FLCN-FNIP complex uncouples its regulation of RagC/D revealing a new paradigm for TFEB  
362 activation distinct from LFC formation during nutrient starvation. Moreover, GABARAP-  
363 dependent TFEB activation is permissive with mTORC1 activity offering new insights into  
364 strategies to enhance lysosomal biogenesis. Given the conjugation of ATG8 proteins to double  
365 membrane autophagosomes<sup>51</sup>, it is logical that GABARAPs would play a critical role in  
366 coordinating the activation of TFEB during the early stage of autophagy. Indeed, the  
367 GABARAP-FLCN-FNIP axis was required for TFEB activation during mitophagy and  
368 xenophagy suggesting that this newly identified mechanism can broadly serve to coordinate  
369 lysosomal capacity (Fig. 7). Conjugation of GABARAP and sequestration of FLCN-FNIP to the  
370 forming autophagosome can be viewed as a stage-gate ensuring tight coordination of autophagy  
371 with lysosomal capacity.

372 Germline mutations in *FLCN* underlie the FLCN-FNIP complex loss of function phenotype and  
373 TFEB-dependency in Birt-Hogg-Dube syndrome<sup>22, 52</sup>, a rare disorder that predisposes patients to

374 kidney tumors. Interestingly, Ras-driven pancreatic adenocarcinoma cells (PDAC) show  
375 constitutive nuclear localization of TFEB/TFE3 and notable colocalization of LC3 with LAMP2-  
376 positive lysosomes<sup>53,54</sup>. Moreover, elevated activity and permeability of lysosomes has been  
377 noted in PDAC<sup>54</sup> and our study suggests a mechanism to explain TFEB nuclear localization  
378 despite nutrient replete and mTOR-active conditions<sup>53</sup>. Understanding the involvement of  
379 FLCN-FNIP membrane sequestration in this setting and whether oncogenic signals might take  
380 advantage of this mechanism to drive TFEB-dependent tumor growth may offer new therapeutic  
381 opportunities for lysosome-dependent tumors.

382 Linking TFEB activation to GABARAP membrane conjugation allows for sensitive detection of  
383 not only autophagy initiation and flux, but also dysfunction within the endolysosomal pathway,  
384 possibly as part of a host-pathogen response. Pathogens have evolved virulence factors to inhibit  
385 and evade SMAC, for example SopF of *S. Typhimurium*<sup>25</sup>, CpsA of *M. tuberculosis*<sup>55</sup>, and RavZ  
386 of *Legionella*<sup>56</sup>. Recently, it has been proposed that disruption of the phagosomal ion gradient  
387 triggered ATG8 modification of the  $\Delta$ sopF *S. Typhimurium*-containing vacuole and that this  
388 precedes vacuole rupture and xenophagy<sup>25</sup>. Induction of SMAC could serve to couple TFEB-  
389 dependent transcription of cytoprotective/antimicrobial genes<sup>57</sup> and lysosomal biogenesis to limit  
390 pathogen infection. While SMAC induction does result in the conjugation of both LC3 and  
391 GABARAP homologs to target membranes, our study highlights that different ATG8s serve  
392 distinct functions. While LC3 is proposed to regulate vesicle maturation and fusion with  
393 lysosomes<sup>58,59</sup>, the primary role of GABARAP may be to coordinate lysosomal capacity to  
394 accommodate increased rates of lysosomal delivery.

395 Our data highlights the importance of the RagC nucleotide state in the regulation of TFEB by  
396 mTOR<sup>22</sup>. mTOR has been shown to mediate the nuclear export of TFEB/TFE3 transcription

397 factors, with phosphorylation promoting cytosolic retention<sup>60</sup>. In the absence of FLCN-FNIP  
398 activity, the regulation of nuclear export is impaired due to a lack of mTOR access to  
399 TFEB/TFE3 as substrates, resulting in nuclear retention rather than active translocation of these  
400 transcription factors<sup>22</sup>. The GABARAP-dependent sequestration of FLCN-FNIP represents a  
401 new paradigm for the control of the RagC/D nucleotide state, previously thought to solely be  
402 regulated by nutrient levels. The contribution of this new mechanism to both the basal and  
403 induced adaptive TFEB/TFE3 responses will be interesting to test in future work. Interestingly,  
404 mice expressing a C-terminal ATG16L1 truncation, thus defective in SMAC, show an  
405 Alzheimer's disease (AD) phenotype<sup>61</sup> and deficiencies in lysosomal biogenesis/homeostasis are  
406 well-characterized in AD and other neurodegenerative disorders<sup>62</sup>. Further understanding the  
407 regulation of this GABARAP-dependent sequestration of FLCN-FNIP, and whether a  
408 homeostatic defect in TFEB/TFE3 activation contributes to neurodegeneration *in vivo* will  
409 provide additional insights into therapeutic opportunities.

410

411

412

413

414

415

416

417

418 **References and notes:**

- 419 1. Dikic, I. Proteasomal and autophagic degradation systems. *Ann Rev Biochem.* **86**, 193-  
420 224 (2017).
- 421 2. Lawrence, R.E., and R. Zoncu. The lysosome as a cellular centre for signalling,  
422 metabolism and quality control. *Nat Cell Biol.* **21**, 133-142 (2019).
- 423 3. Kaur, J., and J. Debnath, Autophagy at the crossroads of catabolism and anabolism. *Nat*  
424 *Rev Mol Cell Biol.* **16**, 461-72 (2015).
- 425 4. Ballabio, A., and J.S. Bonifacino. Lysosomes as dynamic regulators of cell and  
426 organismal homeostasis. *Nat Rev Mol Cell Biol.* **21**, 101-118 (2020).
- 427 5. Florey, O., Kim, S.E., Sandoval, C.P., Haynes, C.M., and M. Overholtzer. Autophagy  
428 machinery mediates macroendocytic processing and entotic cell death by targeting single  
429 membranes. *Nat Cell Biol.* **13**, 1335-43 (2011).
- 430 6. Martinez, J.S., Almendinger, J., Oberst, A., Ness, R., Dillon, C.P., Fitzgerald, P.,  
431 Hengartner, M.O., and D.R. Green. Microtubule-associated protein 1 light chain 3 alpha  
432 (LC3)-associated phagocytosis is required for the efficient clearance of dead cells. *Proc.*  
433 *Nat, Acad. Sci.* **108**, 17396-401 (2011).
- 434 7. Jacquin, E., Leclerc-Mercier, S., Judon, C., Blanchard, E., Fraitag, S., and O. Florey.  
435 Pharmacological modulators of autophagy activate a parallel noncanonical pathway  
436 driving unconventional LC3 lipidation. *Autophagy.* **13**, 854-867 (2017).
- 437 8. Heckmann, B.L., Teubner, B.J.W., Tummers, B., Boada-Romero, E., Harris, L., Yang,  
438 M., Guy, C.S., Zakharenko, S.S., and D.R. Green. LC3-associated endocytosis facilitates  
439  $\beta$ -amyloid clearance and mitigates neurodegeneration in murine Alzheimer's disease.  
440 *Cell.* **178**, 536-51 (2019).

- 441 9. Kaushik, S., and A.M. Cuervo. The coming of age of chaperone-mediated autophagy. *Nat*  
442 *Rev Mol Cell Biol.* **19**, 365-381 (2018).
- 443 10. Honey, K., and A.Y. Rudensky. Lysosomal cysteine proteases regulate antigen  
444 presentation. *Nat Rev Immunol.* **3**, 472-482 (2003).
- 445 11. Buratta, S., Tancini, B., Sagini, K., Delo, F., Chiaradia, E., Urbanelli, L., and C. Emiliani.  
446 Lysosomal exocytosis, exosome release, and secretory autophagy: the autophagic- and  
447 endo-lysosomal systems go extracellular. *Int J Mol Sci.* **21**, 2576 (2020).
- 448 12. Xu, H. and D. Ren. Lysosomal physiology. *Annu Rev Physiol.* **77**, 57-80 (2015).
- 449 13. Liu, G.Y., and D.M. Sabatini. mTOR at the nexus of nutrition, growth, ageing and  
450 disease. *Nat Rev Mol Cell Biol.* **21**, 183-203 (2020).
- 451 14. Fromm, S.A., Lawrence, R.E., and J.H. Hurley. Structural mechanism for amino acid-  
452 dependent Rag GTPase nucleotide state switching by SLC38A9. *Nat Struct Mol Biol.* **27**,  
453 1017-1023 (2020).
- 454 15. Kim, J., and K-L. Guan. mTOR as a central hub of nutrient signalling and cell growth.  
455 *Nat Cell Biol.* **21**, 63-71 (2019).
- 456 16. Settembre, C., Fraldi, A., Medina, D.L., and A. Ballabio. Signals from the lysosome: a  
457 control centre for cellular clearance and energy metabolism. *Nat Rev Mol Cell Biol.* **14**,  
458 283-96 (2013).
- 459 17. Sardiello, M., Palmieri, M., di Ronza, A., Medina, D.L., Valenza, M., Gennarino, V.A.,  
460 Di Malta, C., Donaudy, F., Embrione, V., Polishchuk, R.S., et al., A gene network  
461 regulating lysosomal biogenesis and function. *Science.* **325**, 473-7 (2009).



- 462 18. Martina, J.A., Diab, H.I., Lishu, L., Jeong-A, L., Patange, S., Raben, N., and R.  
463 Puertollano. The nutrient-responsive transcription factor TFE3 promotes autophagy,  
464 lysosomal biogenesis, and clearance of cellular debris. *Sci Signal.* **7**, ra9 (2014).
- 465 19. Settembre, C., Di Malta, C., Polito, V.A., Garcia Arencibia, M., Vetrini, F., Erdin, S.,  
466 Erdin, S.U., Huynh, T., Medina, D., Colella, P., et al. TFEB links autophagy to lysosomal  
467 biogenesis. *Science.* **332**, 1429-33 (2011).
- 468 20. Lawrence, R.E., Fromm, S.A., Fu, Y., Yokom, A.L., Kim, D.J., Thelen, A.M., Young,  
469 L.N., Lim, C-Y., Samelson, A.J., Hurley, J.H., and R. Zoncu. Structural mechanism of a  
470 Rag GTPase activation checkpoint by the lysosomal folliculin complex. *Science.* **366**,  
471 971-977 (2019).
- 472 21. Shen, K., Rogala, K.B., Chou, H-T., Huang, R., Yu, Z., and D.M. Sabatini. Cryo-EM  
473 structure of the human FLCN-FNIP2-Rag-Ragulator complex. *Cell.* **179**, 1319-1329  
474 (2019).
- 475 22. Napolitano, G., Di Malta, C., Esposito, A., de Araujo, M.E.G., Pece, S., Bertalot, G.,  
476 Matarese, M., Benedetti, V., Zampelli, A., Stasyk, T., et al., A substrate-specific  
477 mTORC1 pathway underlies Birt-Hogg-Dube syndrome. *Nature.* **585**, 597-602 (2020).
- 478 23. Settembre, C., Zoncu, R., Medina, D.L., Vetrini, F., Erdin, S., Erdin, S.U., Huynh, T.,  
479 Ferron, M., Karsenty, G., Vellard, M.C., et al., A lysosome-to-nucleus signalling  
480 mechanism senses and regulates the lysosome via mTOR and TFEB. *EMBO J.* **31**, 1095-  
481 1108 (2012).
- 482 24. Galluzzi, L., and D.R., Green, Autophagy-independent functions of the autophagy  
483 machinery. *Cell.* **177**, 1682-99 (2019).

- 484 25. Xu, Y., Zhou, P., Cheng, S., Lu, Q., Nowak, K., Hopp, A-K., Li, L., Shi, X., Zhou, Z.,  
485 Gao, W., et al., A bacterial effector reveals the V-ATPase-ATG16L1 axis that initiates  
486 xenophagy. *Cell*. **178**, 1-15 (2019).
- 487 26. Fletcher, K., Ulferts, R., Jacquin, E., Veith, T., Gammoh, N., Arasteh, J.M., Mayer, U.,  
488 Carding, S.R., Wileman, T., Beale, R., and O. Florey. The WD40 domain of ATG16L1 is  
489 required for its non-canonical role in lipidation of LC3 at single membranes. *EMBO J*.  
490 **37**, e97840 (2018).
- 491 27. Nakamura, S., Shigeyama, S., Minami, S., Shima, T., Akayama, S., Matsuda, T.,  
492 Esposito, A., Napolitano, G., Kuma, A., Namba-Humano, T., et al., LC3 lipidation is  
493 essential for TFEB activation during the lysosomal damage response to kidney injury.  
494 *Nat Cell Biol*. **22**, 1252-1263 (2020).
- 495 28. Kumar, S., Jain, A., Choi, S.W., Duarte da Silva, G.P., Allers, L., Mudd, M.H., Peters,  
496 R.S., Anonsen, J.H., Rusten, T-E., Lazarou, M., and V. Deretic. Mammalian Atg8  
497 proteins and the autophagy factor IRGM control mTOR and TFEB at a regulatory node  
498 critical for responses to pathogens. *Nat Cell Biol*. **22**: 973-985 (2020).
- 499 29. Chen, C-C., Keller, M., Hess, M., Schiffmann, R., Urban, N., Wolfgardt, A., Schaefer,  
500 M., Bracher, F., Biel, M., Wahl-Scott, C., and C. Grimm. A small molecule restores  
501 function to TRPML1 mutant isoforms responsible for mucopolidosis type IV. *Nat Comm.*,  
502 **5**, 1-10 (2014).
- 503 30. Shen, D., Wang, X., Li, X., Zhang, X., Yao, Z., Dibble, S., Dong, X-P., Yu, T.,  
504 Lieberman, A.P., Showalter, H.D., and H. Xu. Lipid storage disorders block lysosomal  
505 trafficking by inhibiting a TRP channel and lysosomal calcium release. *Nat Comm*. **3**, 1-11  
506 (2012).

- 507 31. Liang., C., Piperazine derivatives as trpml modulators. WO 2018/005713 A1. Jan 4  
508 (2018).
- 509 32. Chresta, C.M., Davies, B.R., Hickson, I., Harding, T., Cosulich, S., Critchlow, S.E.,  
510 Vincent, J.P., Ellston, R., Jones, D., Sini, P., et al., AZD8055 is a potent, selective, and  
511 orally bioavailable ATP-competitive mammalian target of rapamycin kinase inhibitor  
512 with in vitro and in vivo antitumor activity. *Cancer Res.* **70**, 288-98 (2010).
- 513 33. Florey, O., Gammoh, N., Kim, S.E., Jiang, X., and M. Overholtzer. V-ATPase and  
514 osmotic imbalances activate endolysosomal LC3 lipidation. *Autophagy.* **11**, 88-99 (2015).
- 515 34. Medina, D.L., Di Paola, S., Peluso, I., Armani, A., De Stefani, D., Venditti, R.,  
516 Montefusco, S., Scotto-Rosato, A., Prezioso, C., Forrester, A., et al., Lysosomal calcium  
517 signaling regulates autophagy through calcineurin and TFEB. *Nat Cell Biol.* **17**, 288-99  
518 (2015).
- 519 35. Johansen, T., and T., Lamark. Selective autophagy: ATG8 family proteins, LIR motifs  
520 and cargo receptors. *J Mol Biol.* **432**, 80-103 (2020).
- 521 36. Dunlop, E.A., Seifan, S., Claessens, T., Behrends, C., Af Kamps, M., Rozycka, E.,  
522 Kemp, A.J., Nookala, R.K., Blenis, J., Coull, B.J., et al., FLCN, a novel autophagy  
523 component, interacts with GABARAP and is regulated by ULK1 phosphorylation.  
524 *Autophagy.* **10**, 1749-1760 (2014).
- 525 37. Hong, S.B., Oh, H.B., Valera, V.A., Baba, M., Schmidt, L.S., and W.M. Linehan.  
526 Inactivation of the FLCN tumor suppressor gene induces TFE3 transcriptional activity by  
527 increasing its nuclear translocation. *PLoS One.* **5**, e15793 (2010).

- 528 38. Petit, C.S., Rocznik-Ferguson, A., and S.M. Ferguson. Recruitment of folliculin to  
529 lysosomes supports the amino acid-dependent activation of Rag GTPases. *J Cell Biol.*  
530 **202**, 1107-1122 (2013).
- 531 39. Martina, J.A., and R., Puertollano. Rag GTPases mediate amino acid-dependent  
532 recruitment of TFEB and MITF to lysosomes. *J Cell Biol.* **200**, 475-91 (2013).
- 533 40. Wirth, M., Zhang, W., Razi, M., Nyoni, L., Joshi, D., O'Reilly, N., Johansen, T., Tooze,  
534 S.A., and S. Mouilleron. Molecular determinants regulating selective binding of  
535 autophagy adapters and receptors to ATG8 proteins. *Nat Comm.* **10**, 2055 (2019).
- 536 41. Meng, J., and S.M., Ferguson. GATOR1-dependent recruitment of FLCN-FNIP to  
537 lysosomes coordinates Rag GTPase heterodimer nucleotide status in response to amino  
538 acids. *J Cell Biol.* **217**, 2765-2776 (2018).
- 539 42. Manifava, M., Smith, M., Rotondo, S., Walker, S., Niewczas, I., Zoncu, R., Clark, J., and  
540 N.T. Ktistakis. Dynamics of mTORC1 activation in response to amino acids. *eLife.*  
541 **5**:e19960 (2016).
- 542 43. Lawrence, R.E., Cho, K.F., Rappold, R., Thrun, A., Tofaute, M., Kim, D.J., Moldavski,  
543 O., Hurley, J.H., and R. Zoncu. A nutrient-induced affinity switch controls mTORC1  
544 activation by its Rag GTPase-Ragulator lysosomal scaffold. *Nat Cell Biol.* **20**, 1052-1063  
545 (2018).
- 546 44. Parminder, K., Tomechko, S.E., Kiselar, J., Shi, W., Deperalta, G., Wecksler, A.T.,  
547 Gokulrangan, G., Ling, V., and M.R. Chance. Characterizing monoclonal antibody structure  
548 by carboxyl group footprinting. *MAbs.* **7**, 540-52 (2015).
- 549 45. Zhang, H., Wen, J., Hunag, R. Y-C., Blankenship, R.E., and M.L. Gross. Mass spectrometry-  
550 based carboxyl footprinting of proteins: method evaluation. *Int J Mass Spectrom.* **312**, 78-  
551 86 (2012).

- 552 46. Noda, N.N., Ohsumi, T., and F. Inagaki. ATG8-family interacting motif crucial for  
553 selective autophagy. *FEBS Lett.* **584**, 1379-1385 (2010).
- 554 47. Nezich, C.L., Wang, C., Fogel, A.I., and R.J. Youle. MiT/TFE3 transcription factors are  
555 activated during mitophagy downstream of Parkin and ATG5. *J Cell Biol.* **210**, 435-50  
556 (2015).
- 557 48. Heo, J-M., Ordureau, A., Swarup, S., Paulo, J.A., Shen, K., Sabatini, D.M., and J.W.  
558 Harper. RAB7A phosphorylation by TBK1 promotes mitophagy via the PINK-PARKIN  
559 pathway. *Sci Adv.* **4**, eaav0443 (2018).
- 560 49. Lazarou, M., Sliter, D.A., Kane, L.A., Sarraf, S.A., Wang, C., Burman, J.L., Sideris,  
561 D.P., Fogel, A.I., and R.J. Youle. The ubiquitin kinase PINK1 recruits autophagy  
562 receptors to induce mitophagy. *Nature.* **524**, 309-314 (2015).
- 563 50. Birmingham, C.L., Smith, A.C., Bakowski, M.A., Yoshimori, T., and J.H. Brumell.  
564 Autophagy controls *Salmonella* infection in response to damage to the *Salmonella*-  
565 containing vacuole. *J Biol Chem.* **281**, 11374-11383 (2006).
- 566 51. Tsuboyama, K., Koyama-Honda, I., Sakamaki, Y., Koike, M., Morishita, H., and N.  
567 Mizushima. The ATG conjugation systems are important for degradation of the inner  
568 autophagosomal membrane. *Science.* **354**, 1036-1041 (2016).
- 569 52. Schmidt, L.S., and W.M. Linehan. FLCN: The causative gene for Birt-Hogg-Dube  
570 syndrome. *Gene.* **640**, 28-42 (2018).
- 571 53. Perera, R.M., Stoykova, S., Nicolay, B.N., Ross, K.N., Fitament, J., Boukhali, M.,  
572 Lengrand, J., Deshpande, V., Selig, M.K., Ferrone, C.R., et al. Transcriptional control of  
573 autophagy-lysosome function drives pancreatic cancer metabolism. *Nature.* **524**, 361-5  
574 (2015).

- 575 54. Gupta, S., Yano, J., Htwe, H.H., Shin, H.R., Cakir, Z., Ituarte, T., Wen, K.W., Kim, G.E.,  
576 Zoncu, R., Dawson, D.D., and R.M. Perera. Lysosomal retargeting of Myoferlin  
577 mitigates membrane stress to enable pancreatic cancer growth. bioRxiv.  
578 doi.org/10.1101/2021.01.04.425106 (2021).
- 579 55. Koster, S., Upadhyay, S., Chandra, P., Papavinasundaram, K., Yang, G., Hassan, A.,  
580 Grigsby, S.J., Mittal, E., Park, H.S., Jones, V., et al., Mycobacterium tuberculosis is  
581 protected from NADPH oxidase and LC3-associated phagocytosis by the LCP protein  
582 CpsA. *Proc Natl Acad Sci.* **114**, E8711-E8720 (2017).
- 583 56. Choy, A., Dancourt, J., Mugo, B., O'Connor, T.J., Isberg, R.R., Melia, T.J., and C.R.  
584 Roy. The Legionella effector RavZ inhibits host autophagy through irreversible Atg8  
585 deconjugation. *Science.* **338**, 1072-6 (2012).
- 586 57. Visvikis, O., Ihuegbu, N., Labed, S.A., Luhachack, L.G., Alves, A-M.F., Wollenberg,  
587 A.C., Stuart, L.M., Stormo, G.D., and J.E. Irazoqui. Innate host defense requires TFEB-  
588 mediated transcription of cytoprotective and antimicrobial genes. *Immunity.* **40**, 896-909  
589 (2014).
- 590 58. Sanjuan, M.A., Dillon, C.P., Tait, S.W.G., Moshiah, S., Dorsey, F., Connell, S.,  
591 Komatsu, M., Tanaka, K., Cleveland, J.L., Withoff, S., and D.R. Green. Toll-like receptor  
592 signalling in macrophages links the autophagy pathway to phagocytosis. *Nature.* **450**,  
593 1253-7 (2007).
- 594 59. Martinez, J., Subbarao Malireddi, R.K., Lu, Q., Dias Cunha, L., Pelletier, S., Gingras, S.,  
595 Orchard, R., Guan, J.L., Tan, H., Peng, J., et al. Molecular characterization of LC3-  
596 associated phagocytosis reveals distinct roles for Rubicon, NOX2 and autophagy  
597 proteins. *Nat Cell Biol.* **17**, 893-906 (2015).

- 598 60. Napolitano, G., Esposito, A., Choi, H., Matarese, M., Benedetti, V., Di Malta, C.,  
599 Monfregola, J., Medina, D.L., Lippincott-Schwartz, J., and A. Ballabio. mTOR-  
600 dependent phosphorylation controls TFEB nuclear export. *Nat Comm.* **9**, 3312 (2018).
- 601 61. Heckmann, B.L., Teubner, B.J.W., Boada-Romero, E., Tummers, B., Guy, C., Fitzgerald,  
602 P., Mayer, U., Carding, S., Zakharenko, S.S., Wileman, T., and D.R. Green.  
603 Noncanonical function of an autophagy protein prevents spontaneous Alzheimer's  
604 disease. *Sci Adv.* **6**, eabb9036 (2020).
- 605 62. Bonam, S.R., Wang, F., and S. Muller. Lysosomes as a therapeutic target. *Nat Rev Drug*  
606 *Disc.* **18**, 923-948 (2019).
- 607  
608  
609  
610  
611  
612  
613  
614  
615  
616  
617  
618  
619  
620  
621  
622  
623

624 **Materials and Methods:**

625 **Antibodies:**

626 Antibodies used in this study were as following: ATG16L1 (8089, human), Phospho-ATG14 S29 (92340),  
627 ATG14 (96752), Phospho-Beclin S30 (54101), FIP200 (12436), FLCN (3697), GABARAPL1 (26632),  
628 GABARAPL2 (14256), GAPDH (5174, 1:10000 for WB), DYKDDDDK tag (14793), HA tag (3724), myc tag  
629 (2278), LC3A/B (12741), LC3B (3868), LAMTOR1 (8975), LAMP1 (15665, 1:1000 for IF), NFAT1 (5861,  
630 1:250 for IF), NPRL2 (37344), Phospho-S6K (9234), S6K (2708), Phospho-S6 S235/236 (4858, 1:3000 for  
631 WB), S6 (2217, 1:5000 for WB), TAX1BP1 (5105), TFEB (4240), TFEB (37785, 1:200 for IF), and Phospho-  
632 ULK S757 (14202) were from Cell Signaling Technologies. Mouse monoclonal anti-S. Typhimurium LPS  
633 (clone 1E6, ab8274) and FNIP1 (ab134969) were from Abcam. TFE3 (HPA023881) was from Millipore  
634 Sigma. p62 (GP62-C) was from Progen. Galectin-3 (sc-23938) was from Santa Cruz Biotechnology. TFEB  
635 (A303-673A, 1:200 for IF in murine cells) was from Bethyl Laboratories. All antibodies were used at a  
636 1:1000 dilution for western blotting unless otherwise noted.

637 **Generation of knockout cell lines with CRISPR/Cas9:**

638 HeLa cells or U2OS cells were made to stably express Cas9 through lentiviral transduction (vector Cat#  
639 SVC9-PS-Hygro, Cellalecta). Knockout cell lines were generated as pooled populations following  
640 subsequent lentiviral transduction with gRNA sequences as indicated (vector Cat# SVCRU6UP-L,  
641 Cellalecta). Pooled populations were selected for 3 days with puromycin (2ug/ml, Life Technologies) and  
642 used for experiments 7-9 days post transduction with gRNA. Clones were isolated for ATG16L1\_KO to  
643 use for reconstitution experiments. gRNA sequences were as follows (5'-3'):

|     |                    |                      |
|-----|--------------------|----------------------|
| 644 | sgCTRL:            | GTAGCGAACGTGTCCGGCGT |
| 645 | sgRB1CC1 (FIP200): | CAGGTGCTGGTGGTCAATGG |
| 646 | sgATG9A:           | TCTGGAAACGGAGGATGCGG |
| 647 | sgPIK3C3 (VPS34):  | CATACACATCCCATATGGTG |
| 648 | sgATG5:            | GCTTCAATTGCATCCTTAGA |
| 649 | sgATG7:            | TCCGTGACCGTACCATGCAG |
| 650 | sgATG16L1:         | GCCACATCTCGGAGCAACTG |
| 651 | sgLAMTOR1:         | GCTGCTGTAGCAGCACCCCA |
| 652 | sgNPRL2:           | GATGCGGCAGCCGCTGCCCA |
| 653 | sgMAP1LC3A (LC3A): | GTCAAGCAGCGGCGGAGCTT |
| 654 | sgMAP1LC3B (LC3B): | GCAGCATCCAACCAAAATCC |
| 655 | sgMAP1LC3C (LC3C): | GCTTGAAGGGTCTGACGCTT |
| 656 | sgGABARAP:         | GGATCTTCTCGCCCTCAGAG |
| 657 | sgGABARAPL1:       | CATGAAGTTCCAGTACAAGG |



658 sgGABARAPL2: TTCCCGCCGCCCATGAAG  
 659 sgFLCN: TCACGCCATTCTACACCAG  
 660 sgFNIP1: TCTGGCTTACAATGATGTGCG  
 661 sgFNIP2: CCAGTTGATATGCCAAGCAG

662

663 **cDNA expression constructs:**

664 Wild type and K490A mutant mouse ATG16L1 were cloned into pBabe-Puro-Flag-S-tag plasmids as  
 665 previously described<sup>26</sup>. pBabe-Blast-GFP-LC3A has been previously described<sup>5</sup>.

666 The following constructs were generated for use in this study:

| Insert                                               | Epitope Tag | Terminus | Expression vector         |
|------------------------------------------------------|-------------|----------|---------------------------|
| Human FNIP1 WT                                       | 3X HA       | N        | pcDNA-DEST40              |
| Human FLCN WT                                        | FLAG        | C        | pcDNA-DEST40<br>Tet Lenti |
| Human lyso-FLCN<br>(Nterm 39aa of<br>LAMTOR1 fusion) | FLAG        | C        | Tet Lenti                 |
| Human GABARAP WT                                     | myc         | N        | pcDNA-DEST40              |
| Human GABARAP<br>LBMmut                              | myc         | N        | pcDNA-DEST40              |
| Human ATG16L1 WT                                     | FLAG        | N        | Tet Lenti                 |
| Human ATG16L1 ΔCTD                                   | FLAG        | N        | Tet Lenti                 |
| Human ATG16L1 ΔFBD                                   | FLAG        | N        | Tet Lenti                 |
| Human ATG16L1 F467A                                  | FLAG        | N        | Tet Lenti                 |
| Human ATG16L1 K490A                                  | FLAG        | N        | Tet Lenti                 |
| S. Typhimurium SopF                                  | myc         | N        | Tet-Lenti                 |
| Human LAMP1                                          | RFP         | C        | pBabe                     |
| Human FNIP1 WT                                       | 3XHA        | N        | Tet Lenti                 |
| Human FNIP1<br>Y583A/V586A                           | 3XHA        | N        | Tet Lenti                 |
| Human TMEM192                                        | 3XHA        | C        | Tet Lenti                 |

667

668 cDNA constructs with the indicated epitope tags were synthesized (Genscript, USA) and provided as  
 669 entry clones. Gateway recombination was used to shuttle cassettes into pcDNA-DEST40 (Life  
 670 Technologies) or a lentiviral vector allowing tetracycline inducible expression referred to as Tet-Lenti  
 671 (synthesized by Genscript, USA).

672 **Cell Culture:**

673 Cell lines used in this study were U2OS, HeLa, and RAW264.7 and were obtained from the American  
 674 Type Culture Collection (ATCC). HEK293FT were obtained from ThermoFisher Scientific. Cell lines were

675 verified to be mycoplasma-free by routine testing. All cells were cultured in a humidified incubator at  
676 37°C and 5% CO<sub>2</sub>. Cell culture reagents were obtained from Invitrogen unless otherwise specified. Cells  
677 were grown in Dulbecco's Modified Eagle's Medium (DMEM) supplemented with 10% fetal bovine  
678 serum and 1% penicillin/streptomycin.

#### 679 **Reagents:**

680 Bafilomycin A1, PIK-III, and AZD8055 were purchased from Selleckchem. ML-SA1 and MK6-83 were  
681 purchased from Tocris. Monensin, nigericin, salinomycin, valinomycin, and LLoMe were purchased from  
682 Sigma Aldrich. C8 is available for purchase through Chemshuttle (Cat# 187417).

#### 683 **Viral production and transduction:**

684 For lentiviral production of CRISPR gRNA or Cas9 virus and cDNA overexpression virus, 8 x 10<sup>5</sup> 293FT  
685 cells were plated in 6-well plates. The next day, cells were transfected with lentiviral packaging mix (1 ug  
686 psPAX2 and 0.25 ug VSV-G) along with 1.5 ug of the lentiviral backbone using Lipofectamine 2000  
687 (ThermoFisher). Supernatant was removed from 293FT cells after 48 hr, centrifuged at 2000 rpm for 5  
688 min and then syringe filtered using a 0.45 um filter (Millipore). Polybrene was then added to a final  
689 concentration of 8 ug/ml and target cells were infected overnight. Cells were then allowed to recover  
690 for 24 hr in DMEM/10% FBS before being selected with 1 mg/ml neomycin (G418:Geneticin,  
691 ThermoFisher), 2ug/ml puromycin (ThermoFisher), or 500 ug/ml Hygromycin B (ThermoFisher) for 72 hr.  
692 Retroviral infection was performed using centrifugation. Stable populations were selected with  
693 puromycin (2 mg/ml) or blasticidin (10 mg/ml) for 3-5 days.

#### 694 **Cell lysis and western blotting:**

695 For preparation of total cell lysates, cells were lysed in RIPA buffer (#9806, Cell Signaling Technology)  
696 supplemented with sodium dodecyl sulfate (SDS, Boston BioProducts) to 1% final concentration, and  
697 protease inhibitor tablets (Complete EDTA-free, Roche). Lysates were homogenized by sequential  
698 passaging through Qiashredder columns (Qiagen), and protein levels were quantified by Lowry DC  
699 protein assay (Bio-Rad). Proteins were denatured in 6X Laemmli SDS loading buffer (Boston BioProducts)  
700 at 100°C for 5 min.

701 For preparation of membrane fractions, 1.5 X10<sup>6</sup> cells were plated the day before in 6cm tissue culture  
702 dishes (BD Falcon). Cellular fractions were prepared using the MEM-PER kit (ThermoFisher) according to  
703 the manufacturer's protocol. Protein levels were quantified by Lowry DC protein assay (Bio-Rad) and  
704 denatured in 6X Laemmli SDS loading buffer (Boston BioProducts).

705 For western blotting, equivalent amounts of total proteins were separated on Tris-Glycine TGx SDS-  
706 PAGE gels (Bio-Rad). Proteins were transferred to nitrocellulose using standard methods and  
707 membranes were blocked in 5% non-fat dry milk (Cell Signaling Technology) in TBS with 0.2% Tween-20  
708 (Boston BioProducts). Primary antibodies were diluted in 5% bovine serum albumin (BSA, Cell Signaling  
709 Technology) in TBS with 0.2% Tween-20 and were incubated with membranes at 4°C overnight. HRP-  
710 conjugated secondary antibodies were diluted in blocking solution (1:20,000, ThermoFisher) and  
711 incubated with membranes at room temperature for 1 h. Western blots were developed using West  
712 PicoPLUS Super Signal ECL reagents (Pierce) and film (GEHealthcare).

#### 713 **Immunoprecipitation:**

714 For immunoprecipitations, cells were lysed in IP CHAPS lysis buffer: 0.3% CHAPS, 10 mM β-glycerol  
715 phosphate, 10 mM pyrophosphate, 40 mM Hepes pH 7.4, 2.5 mM MgCl<sub>2</sub>, supplemented with protease  
716 inhibitor tablets (Roche) and Calyculin A (Cell Signaling Technology). Lysates were clarified by

717 centrifugation and equilibrated as described above. For FLAG IP, lysates were incubated with anti-M2  
718 FLAG-conjugated agarose beads (Sigma-Aldrich) at 10 ul bed volume per 1 mg of protein and incubated  
719 for 1 hour at 4°C with gentle rocking. For MYC IP, lysates were incubated with 10 ul bed volume per 1  
720 mg protein of anti-myc 9E10-conjugated agarose beads (Sigma Aldrich). Beads were then centrifuged  
721 and washed 3X with lysis buffer supplemented with 300mM NaCl. Immunoprecipitate was eluted by  
722 addition of 6X Laemmli SDS loading buffer at 100°C for 5 min.

723 LysolP was performed as described previously<sup>63</sup>. Briefly, U2OS cells stably expressing 3XHA-TMEM192  
724 were washed twice with ice-cold PBS and then scraped into 1ml of ice-cold LysolP buffer (136 mM KCl,  
725 10 mM KH<sub>2</sub>PO<sub>4</sub>, pH 7.25 in Optima LC/MS water). 100ul of cell suspension was reserved for input  
726 sample. Cells were then homogenized using 35 strokes of a dounce homogenizer followed by  
727 centrifugation for 10 minutes at 1500 x g in a 4°C centrifuge. Clarified homogenates were then  
728 incubated with 50ul prewashed anti-HA magnetic beads for 30 minutes with constant rotation at 4°C.  
729 Beads were then washed 4X with LysolP washing buffer (136 mM KCl, 10 mM KH<sub>2</sub>PO<sub>4</sub>, pH 7.25 in Optima  
730 LC/MS water, 300mM NaCl). Both input and immunoprecipitated samples were then lysed with LysolP  
731 lysis buffer (40 mM HEPES pH 7.4, 1% Triton X-100, 10 mM β-glycerol phosphate, 10 mM  
732 pyrophosphate, 2.5 mM MgCl<sub>2</sub> and complete EDTA-free Protease Inhibitor Cocktail (Roche)). 6X Laemmli  
733 SDS loading buffer was added and samples placed at 100°C for 5 min.

734

#### 735 **Immunofluorescence and high content image analysis:**

736 Following indicated treatments, GFP-LC3 LAMP1-RFP expressing cells were fixed with ice cold methanol  
737 for 3 minutes at -20°C. Cells were washed in PBS and image acquisition was performed using a Confocal  
738 Zeiss LSM 780 microscope (Carl Zeiss Ltd) equipped with a 40x oil immersion 1.40 numerical aperture  
739 (NA) objective using Zen software (Carl Zeiss Ltd).

740 For quantification, the number of GFP-LC3 puncta were counted for >20 cells across multiple fields of  
741 view. For co-localization quantification, GFP-LC3 puncta were assessed for LAMP1-RFP.

742 For LC3 and LAMP1 staining in primary BMDMs, cells were plated on 18 mm coverslips. The next day  
743 cells were treated as indicated and cells fixed in ice cold methanol as above. Cells were then blocked in  
744 PBS + 5% BSA for 1 hour before addition of primary antibodies (anti-LC3A/B, CST #4108, 1:100; anti-  
745 LAMP1, BD #555798, 1:100) diluted in blocking buffer overnight at 4°C. Cells were washed and  
746 incubated with fluorescent secondary antibodies in blocking buffer for 1 hour at room temperature.  
747 Cells were washed in PBS incubated with DAPI and mounted on glass slides using Prolong anti-fade  
748 reagent (Life Technologies).

749 For endogenous TFEB staining in mouse macrophage, cells were fixed in 3.7% formaldehyde for 15  
750 minutes at room temperature, washed in PBS and permeabilized in 0.2% triton/PBS for 5 mins. Cells  
751 were then processed as above for primary (anti-TFEB, Bethyl Laboratories, #A303-673A, 1:200) and  
752 secondary antibodies. Images were acquired using a Confocal Zeiss LSM 780 microscope (Carl Zeiss Ltd)  
753 equipped with a 40x oil immersion 1.40 numerical aperture (NA) objective using Zen software (Carl Zeiss  
754 Ltd). Analysis was performed using Image J. For nuclear cytosol quantification, the ratio of fluorescent  
755 intensity of TFEB within the DAPI was mask versus the cytosol of 30 cells across 2 independent  
756 experiments were measured.

757 For high content image acquisition, cells were plated in 96-well glass bottom, black wall plates (Greiner,  
758 #655892) or 384-well polystyrene, black-wall plates (Greiner, #781091) and grown overnight to 70%  
759 confluency. Treatments were performed as indicated. Cells were fixed for 10 min in either -20°C

760 methanol or 4% paraformaldehyde (Electron Microscopy Sciences). Cells were blocked and  
761 permeabilized in a solution containing 1:1 Odyssey blocking buffer (LiCor)/PBS (Invitrogen) with 0.1%  
762 Triton X-100 (Sigma) and 1% normal goat serum (Invitrogen) for 1 h at room temperature. Primary  
763 antibodies were added overnight at 4°C in blocking buffer described above. After washing plates with  
764 PBS using an EL-406 plate washer (BioTek), secondary Alexa-conjugated antibodies (Life Technologies)  
765 were diluted 1:1,000 in blocking solution supplemented with DAPI and applied for 1 h at room  
766 temperature. Cells were then washed again in PBS as described and imaged using an INCELL 6500 high-  
767 content imager (GE Healthcare). Images were analyzed using the GE InCarta software.

768 For imaging in the context of *Salmonella* infection, cells were fixed with 4% paraformaldehyde in PBS at  
769 37 °C for 10 min. Immunostaining was performed as previously described<sup>64</sup>. Cells were imaged using a  
770 Quorum spinning disk microscope with a 63Å~ oil immersion objective (Leica DMIRE2 inverted  
771 fluorescence microscope equipped with a Hamamatsu Back-Thinned EM-CCD camera or Hamamatsu  
772 CMOS FL-400 camera, spinning disk confocal scan head) and Volocity 6.3 acquisition software  
773 (Improvision). Confocal z-stacks of 0.3 µm were acquired and images were analysed with Volocity 6.3  
774 software.

### 775 **Correlative FIB-SEM**

776 Cells were seeded in 35-mm glass-bottom dishes (MatTek Corp., USA, #P35G-2-14-CGRD). They were  
777 fixed with 4% formaldehyde (TAAB F017, 16% w/v solution formaldehyde-methanol free) in 0.1 M  
778 phosphate buffer pH 7.4 (PB) for 30 min at 4 °C. They were washed in PB and imaged with a 40x/1.4 NA  
779 objective on an inverted confocal microscope (Zeiss LSM780). Further fixation was carried out with 2%  
780 formaldehyde and 2.5% glutaraldehyde (TAAB G011/2, 25% solution glutaraldehyde) in PB for 2 hours,  
781 prior to further processing.

782 Samples were embedded using a protocol as described previously<sup>65, 66</sup>. The cells were washed in PB five  
783 times and post-fixed in 1% osmium tetroxide (Agar Scientific, R1023, 4% solution osmium tetroxide) and  
784 1.5% potassium ferrocyanide (v/v) (SIGMA ALDRICH, P3289-100G, potassium hexacyanoferrate (II)  
785 trihydrate) for 1 hour on ice. And then dehydrated and embedded in Hard-Plus Resin812 (EMS, #14115).  
786 The samples were polymerized for 72 h at 60 °C. The coverslip was removed from the resin by dipping  
787 the block into liquid nitrogen. After locating the region of interest (ROI) on the block surface using the  
788 imprint of the grid, the block was cut to fit on an aluminium stub using a hacksaw, and trimmed with a  
789 razorblade. The block/stub was then coated with 20nm Pt using a Safematic CCU-010 sputter coater  
790 (Labtech) to create a conductive surface.

791 The block/stub was placed in the chamber of a Zeiss 550 CrossBeam FIB SEM and the surface imaged  
792 using the electron beam at 10 kV to locate the grid and underlying cells. Once the ROI had been  
793 identified, Atlas software (Fibics) was used to operate the system. A trench was cut into the resin to  
794 expose the target cell and serial SEM images were acquired with 7 nm isotropic resolution using a 1.5 kV  
795 electron beam. For 3D-image analysis, image stacks were processed using Atlas software and viewed  
796 using ImageJ.

797

### 798 **RNA isolation and RNAseq analysis:**

799 **RNA isolation:**

800 Total RNA was prepared from cells treated with DMSO or 2uM C8 for 24 hours using Trizol extraction  
801 and RNAeasy Mini Kit (Qiagen). A total of 2ug of RNA with a RIN score of >9.8 was submitted for RNAseq  
802 analysis.

### 803 **Library preparation, HiSeq sequencing and Analysis:**

804 RNA sequencing libraries were prepared using the NEBNext Ultra RNA Library Prep Kit for Illumina using  
805 manufacturer's instructions (NEB, MA). mRNAs were enriched with Oligod(T) beads, and the enriched  
806 mRNAs fragmented at 94°C (15 minutes). This was followed by first strand and second strand cDNA  
807 synthesis. cDNA fragments were end-repaired and adenylated at 3'ends. Universal adapters were then  
808 ligated to cDNA fragments, followed by index addition and library enrichment by PCR with limited cycles.  
809 The sequencing library and RNA samples for RNAseq were quantified using Qubit 2.0 Fluorometer (Life  
810 Technologies, CA) and RNA integrity checked using Agilent TapeStation 4200 (Agilent Technologies, CA).

811 The sequencing libraries were clustered on a single lane of a flowcell on the Illumina HiSeq 4000 system  
812 according to manufacturer's instructions. The samples were sequenced using a 2x150bp Paired End (PE)  
813 configuration. Image analysis and base calling were conducted by the HiSeq Control Software (HCS). Raw  
814 sequence data (.bcl files) generated from Illumina HiSeq was converted into fastq files and de-  
815 multiplexed using Illumina's bcl2fastq 2.17 software. One mismatch was allowed for index sequence  
816 identification. Sequence reads were mapped to the Homo sapiens reference genome version GRCh38  
817 available on ENSEMBL using the STAR aligner v.2.5.2b. Unique gene hit counts were calculated by using  
818 feature Counts from the Subread package v.1.5.2. Only unique reads that fell within exon regions were  
819 counted.

820 The count data was normalized by the trimmed mean of M-values normalization (TMM) method,  
821 followed by variance estimation and applying generalized linear models (GLMs), utilizing functions from  
822 empirical analysis of digital gene expression<sup>67</sup> to identify differentially expressed genes as described  
823 previously<sup>68, 69</sup>. Factorial designs were incorporated into the analysis by fitting these linear models with  
824 the coefficient for each of the factor combinations and then simultaneously extracting contrasts for the  
825 respective 'differential-of-differential' analysis in the two experimental dimensions (C8 stimulation and  
826 genotype status: ATG16L1KO and WT). The associated p-values were adjusted to control the false  
827 discovery rate in multiple testing, using the Benjamini and Hochberg's (BH) method (BH-adjusted  
828 p<0.05).

829 Pathway and biological process enrichment analysis were performed as previously described<sup>69, 70</sup>. Briefly,  
830 data were interrogated from KEGG pathways and gene ontology biological processes. Each module or  
831 category was assessed for statistical enrichment or over-representation among differentially expressed  
832 genes relative to their representation in the global set of genes in the genome. P-values were computed  
833 using the hypergeometric test.

### 834 **Quantitative PCR with reverse transcription analysis**

835 RNA extractions were performed using the RNeasy Mini Kit (QIAGEN), and complementary DNA was  
836 subsequently generated using the iScript cDNA Synthesis Kit (Bio-Rad). Quantitative PCR analysis was  
837 performed on the QuantStudio 3 Real-time PCR system (ThermoFisher) using the SsoFast EvaGreen  
838 Supermix Kit (Bio-Rad) and the following primer sets: GPNMB human (5' GCCTTTAAGGATGGCAAACA 3'  
839 and 5' TGACACGGTTGAGAAAGACAC 3'), RRAGD human (5' TCCGGTGGATATGCAAACCT 3' and 5'

840 ACAAGCAAACGAGAGCCAG 3') and GAPDH human (5' GGAGCGAGATCCCTCCAAAAT 3' and 5'  
841 GGCTGTTGTCATACTTCTCATGG 3'). Data were normalized to that of the housekeeping gene GAPDH.

#### 842 **Lysotracker staining:**

843 U2OS.Cas9 cells expressing a control gRNA or knocked out for ATG16L1 were treated for 24 hours with  
844 2uM C8. Cells were then washed and incubated live for 20 min with 25nM Lysotracker Red DND-99  
845 (ThermoFisher) and Hoecsht 33342 (ThermoFisher) diluted in warmed imaging buffer (20 mM HEPES (pH  
846 7.4) , 140 mM NaCl, 2.5 mM KCl, 1.8 mM CaCl<sub>2</sub>, 1 mM MgCl<sub>2</sub>, 10 mM D-glucose, and 5% v/v FBS).  
847 Staining solution was removed and cells were incubated in imaging buffer for an additional 30 min  
848 before image acquisition on the INCELL 6500. Images were analyzed using the GE InCarta software.

849

#### 850 **Generation of ATG16L1 K490A knockin mouse model**

851 The K490A point mutation was introduced into C57/BL6 mice via direct zygote injection of CRISPR/Cas9  
852 reagents. Briefly, a single stranded guide sequence was designed and synthesised along with a  
853 tracerRNA from Dharmacon. A repair donor single stranded DNA sequence was designed to introduce  
854 the K490A point mutation and mutate the PAM sequence to stop re-targeting of the Cas9 complex to  
855 already edited DNA. These reagents along with recombinant Cas9, were injected into mouse zygotes.  
856 Pups born from these injections were genotyped via Transnetyx and heterozogous founders were bred  
857 with wild type mice to obtain pure heterozygote animals. Further breeding yielded mice homozygous for  
858 the K490A mutation. Mice were housed in the Biological Support Unit at the Babraham Institute under  
859 specific pathogen-free conditions. All animal experiments at The Babraham Insitute were reviewed and  
860 approved by The Animal Welfare and Ethics Review Body and performed under Home Office Project  
861 license PPL/PO302B91A.

862 K490A guide sequence-

863 GUUAGGGGCAUCACGGCUCGUUUUAGAGCUAUGCUGUUUUG

864 Repair donor ssDNA-

865 GCTGTCTCCCTTAGGTCAGAGAGAGTGTGGTCCGAGAGATGGAAGTGTAGGGGCGGATCACCGCTTGGACCTAA  
866 ACCCTGAGAGAACTGAGCTCCTGAGCTGCTCCCGTGATGACCTG

#### 867 **Bone Marrow Derived Macrophage isolation**

868 C57/BL6 wild-type and ATG16L1 K490A mice, aged 13–15 weeks, were used to obtain BMDCs. Bone  
869 marrow cells were isolated by flushing tibias and femurs with PBS + 2% FBS. Cells were pelleted and  
870 resuspended in 1 ml Red Blood Cell lysis buffer (150 mM NH<sub>4</sub>Cl, 10 mM KHCO<sub>3</sub>, 0.1 mM EDTA) for 2 min  
871 at room temperature. Cells were pelleted and resuspended in RPMI 1640 (Invitrogen 22409-031), 10%  
872 FBS, 1% Pen/Strep, 50 μM 2-mercaptoethanol supplemented with 20 ng/ml M-CSF (Peprotech #AF-315-  
873 02) and 50ng/ml Fungizone (Amphotericin B) (Gibco #15290018). Media was refreshed on days 3 and 6  
874 and cells plated for assays on day 8.

875

#### 876 **HEK293 GFP-LC3B ATG13/ATG16L1 DKO cells**



877 ATG13\_KO HEK293 cells stably expressing GFP-LC3B maintained in DMEM, 10% FBS, 1% pen/strep, were  
878 used as previously described<sup>7</sup>. To generate *ATG16L1* KO, gRNA sequence (GTGGATACTCATCCTGGTTC)  
879 with overhangs for containing a Bpil site was annealed and cloned into the pSpCas9(BB)-2A-GFP plasmid  
880 (Addgene, 48138; deposited by Dr. Feng Zhang) digested with the Bpil restriction enzyme (Thermo  
881 Scientific, ER1011). The recombinant plasmid along with a pBabe-puro construct (Addgene, 1764;  
882 deposited by Dr. Hartmut Land) expressing mouse ATG16L1 variants was transfected into HEK293  
883 ATG13\_KO GFP-LC3B cells via Lipofectamine 2000 (Invitrogen). Cells were selected with 2.5 µg/ml  
884 puromycin (P8833, Sigma) for 48 h, and single cell clones were obtained by limiting dilution. After clonal  
885 expansion, *ATG16L1* KO clones were selected based on the absence of ATG16L1 protein as detected by  
886 Western blot.

887 RAW264.7 wild type and ATG16L1\_KO cells were kindly provided by Dr Anne Simonsen<sup>71</sup> and maintained  
888 in DMEM 10% FBS, 1% pen/strep.

### 889 **Live imaging time-lapse confocal microscopy**

890 HEK293 cells were plated on 35 mm glass-bottomed dishes (Mattek, Ashland, MA). Images were  
891 acquired every 2 minutes using a spinning disk confocal microscope, comprising Nikon Ti-E stand, Nikon  
892 60x 1.45 NA oil immersion lens, Yokogawa CSU-X scanhead, Andor iXon 897 EM-CCD camera and Andor  
893 laser combiner. All imaging with live cells was performed within incubation chambers at 37°C and 5%  
894 CO<sub>2</sub>. Image acquisition and analysis was performed with Andor iQ3 (Andor Technology, UK) and ImageJ.

### 895 **Endogenous Calcium Imaging**

896 Hela wild-type and Hela ATG16L1KO cells were trypsinized and seeded at 20000 per well of PDL coated  
897 Greiner Bio plates for 2 h. Cells were loaded with 10 µl of Calcium 6 dye solution for 1.5 h at room  
898 temperature. After incubation, the dye was removed from the plates and replaced with 10µl of low Ca<sup>2+</sup>  
899 solution containing 145 mM NaCl, 5 mM KCl, 3 mM MgCl<sub>2</sub>, 10 mM glucose, 1 mM EGTA and 20 mM HEPES  
900 at pH 7.4. With 1 mM EGTA, the free Ca<sup>2+</sup> concentration is estimated to be < 10 nM based on the  
901 Maxchelator software (<http://maxchelator.stanford.edu/>). Compounds plates were prepared with low  
902 calcium solution. Cell and compound plates were loaded onto the FLIPR and the 15 min protocol was run.  
903 The fluorescence intensity at 470nm was monitored. After an initial 10 second baseline read, compounds  
904 were added to the cells. Images were taken for 15 minutes to monitor effects on Ca<sup>2+</sup> fluorescence. Data  
905 exported as max-min Relative Fluorescence Unit (RFU).

### 906 **Recombinant protein expression**

#### 907 **Protein purification**

908 For evaluation of the FLCN/FNIP2/GABARAP complex by size exclusion chromatography, FLCN and FNIP2  
909 were subcloned as twin-strep-FLAG and GST fusion proteins, respectively, and purified as described<sup>20</sup>.  
910 Final purified complexes were snap frozen in liquid nitrogen in buffer A (25 mM HEPES pH 7.4, 130 mM  
911 NaCl, 2.5 mM MgCl<sub>2</sub>, 2 mM EGTA, and 0.5 mM TCEP). Full-length human GABARAP (1-117) was  
912 subcloned with a C-terminal MBP tag (GABARAP\_MBP) separated by a GSSGSS linker in pET21b and  
913 expressed in *E. coli* following induction at 16°C for 16 hours in LB. Cells were lysed in 50 mM Tris pH 7.4,  
914 500 mM NaCl, 0.5 mM TCEP, 0.1% Triton X-100, 1 mM PMSF, and 15 µg/ml benzamidine; sonicated; and  
915 clarified by centrifugation. GABARAP\_MBP was purified using amylose resin equilibrated in wash buffer  
916 (50 mM Tris pH 7.4, 500 mM NaCl, 0.5 mM TCEP) and eluted with wash buffer plus 30 mM maltose. The

917 protein was further purified by size exclusion chromatography using a Superdex 75 column equilibrated  
918 buffer A and snap frozen in liquid nitrogen. Purified GABARAP\_MBP was mixed with FLCN/FNIP2 at a  
919 ratio of 1:0.8 and gently mixed for 2 hours at 4 °C. The sample was injected onto a Superose 6 Increase  
920 (GE) column (1CV = 24 mL) that was pre-equilibrated in Buffer A. The retention time of peak fractions  
921 were compared to FLCN/FNIP2 and GABARAP\_MBP alone followed by evaluation of samples using 12%  
922 SDS-PAGE.

923 For GEE labelling studies, full-length human FLCN-PreScission-MBP and His8-TEV-FNIP2 were subcloned  
924 for co-expression in mammalian cells. Cells were lysed in 50 mM Tris pH 8.0, 200 mM NaCl, 10% glycerol,  
925 1% Triton X-100, and 2 mM MgCl<sub>2</sub> with Protease Inhibitor Cocktail (Roche) and clarified by  
926 centrifugation. Protease Inhibitor tablets were included throughout purification to prevent degradation.  
927 The FLCN/FNIP2 complex was purified over an amylose column equilibrated in wash buffer (50 mM Tris  
928 pH 8.0, 500 mM NaCl, 10% glycerol, 1% Triton X-100, and 2 mM MgCl<sub>2</sub>), washed and eluted in wash  
929 buffer plus 10 mM maltose. The complex was further purified by IMAC chromatography and eluted in  
930 buffer B (50 mM Tris pH 8.0, 500 mM NaCl, 10% glycerol, 0.11 mM NG311, and 2 mM MgCl<sub>2</sub>) plus 250  
931 mM imidazole followed by overnight cleavage with PreScission Protease™ at 4°C. The cleaved MBP tag  
932 was removed with a second amylose column, and the complex was concentrated prior to purification by  
933 size exclusion chromatography using a Superdex 200 column equilibrated in buffer B. The sample was  
934 snap frozen in liquid nitrogen. GABARAP (1-117) was cloned as GST-PreScission-His8-TEV-GABARAP for  
935 expression in *E. coli* and lysis as described for GABARAP\_MBP. GABARAP was purified using glutathione  
936 resin equilibrated in buffer C (50 mM Tris pH 8.0, 500 mM NaCl, and 0.5 mM TCEP) and eluted using  
937 buffer C plus 10 mM glutathione. The GST tag was cleaved overnight at 4°C with PreScission Protease  
938 and purified by size exclusion chromatography using a Superdex 75 column equilibrated in buffer D (50  
939 mM Tris pH 8.0, 150 mM NaCl, and 0.5 mM TCEP). His8-TEV-GABARAP was applied to an IMAC column  
940 equilibrated in buffer E (25 mM Tris pH 8.0, 150 mM NaCl, and 0.5 mM TCEP), eluted in buffer E plus 250  
941 imidazole, and dialyzed into buffer E. Final samples were concentrated and snap frozen in liquid  
942 nitrogen.

943 For X-ray crystallography, a single polypeptide clone was designed using GST-PreScission-His8-TEV  
944 followed by residues 558-576 of FNIP2, a Gly-Ser spacer, and full-length GABARAP. Protein was  
945 expressed and purified using glutathione resin as described for GST-PreScission-His8-TEV-GABARAP. The  
946 tag was cleaved using TEV protease and purified by size exclusion chromatography using a Superdex 75  
947 column in buffer D. Residual tag was removed by IMAC chromatography and the final protein was  
948 exchanged into buffer E by dialysis, concentrated to 18.7 mg/mL prior, and snap frozen in liquid  
949 nitrogen.

950 For evaluation of the binding affinity of GABARAP and LC3B for the FLCN/FNIP2 complex via SPR, full-  
951 length human FLCN-8xG-AviTag-PreScission-MBP and full-length human His8-TEV-FNIP2 were expressed  
952 in mammalian cells and purified above as described for GEE labelling studies. Biotinylation of the AviTag  
953 in full-length human FLCN-8xG-AviTag-PreScission-MBP was performed following according to the  
954 manufacturer's (Avidity) suggested protocol and was performed following PreScission protease cleavage  
955 and prior to size exclusion chromatography. Full-length human GABARAP (1-117) was purified as  
956 described above for GEE studies. Full-length human LC3B (1-125) was cloned as GST-PreScission-His8-  
957 TEV-LC3B for expression in *E. coli* and lysis as described for GABARAP\_MBP. LC3B was purified using  
958 glutathione resin equilibrated in buffer C (50 mM Tris pH 8.0, 500 mM NaCl, and 0.5 mM TCEP) and  
959 eluted using buffer C plus 10 mM glutathione. The GST tag was cleaved overnight at 4°C with



960 PreScission Protease and purified by size exclusion chromatography using a Superdex 75 column  
961 equilibrated in buffer D (50 mM Tris pH 8.0, 150 mM NaCl, and 0.5 mM TCEP). His8-TEV-LC3B was  
962 applied to an IMAC column equilibrated in buffer E (25 mM Tris pH 8.0, 150 mM NaCl, and 0.5 mM  
963 TCEP), eluted in buffer E plus 250 imidazole, and dialyzed into buffer E. Final samples were  
964 concentrated and snap frozen in liquid nitrogen.

965 For evaluation of the binding affinity of GABARAP and LC3B for the p62 FIR domain via SPR, the FIR  
966 region of human p62 (326-380) with the 4P mutations (S349E, S365E, S366E, S370E)<sup>72</sup> was cloned as  
967 GST-PreScission-p62 FIR 4P for expression in *E. coli* following induction at 18°C for 16 hours in TB. Cells  
968 were lysed in 50 mM HEPES pH 7.0, 300 mM NaCl, 5 mM MgCl<sub>2</sub>, 2 mM CaCl<sub>2</sub>, 1 mM TCEP and 1 U/mL  
969 DNase I; sonicated; and clarified by centrifugation. GST-PreScission-p62 FIR 4P was purified using  
970 glutathione resin equilibrated in 50 mM HEPES pH 7.0, 300 mM NaCl, 1 mM TCEP and eluted using the  
971 same buffer supplemented with 10 mM glutathione. The GST tag was left on the protein, and GST-  
972 PreScission-p62 FIR 4P was further purified by size exclusion chromatography using a Superdex 200  
973 column equilibrated in 50 mM HEPES pH 7.0, 300 mM NaCl, 1 mM TCEP. Fractions containing GST-  
974 PreScission-p62 FIR 4P were pooled, concentrated and snap frozen in liquid nitrogen. GST protein used  
975 as a reference for SPR was purchased from Cytiva.

#### 976 **Protein Crystallization**

977 FNIP2-GABARAP chimera was crystallized by the vapor diffusion method using equal volumes protein  
978 and 0.1 M Magnesium acetate, 0.1 M MOPS pH 7.5, 12% v/v PEG 8000 in sitting drops. Crystals were  
979 frozen using well solution supplemented with 20% glycerol. Data were collected at beamline BL18U1 of  
980 the Shanghai Synchrotron Radiation Facility (SSRF) and processed with XDS<sup>73</sup> and AIMLESS<sup>74</sup>. The  
981 structure was solved by molecular replacement with PHASER<sup>75</sup> using 6hyo<sup>40</sup> as a search model and  
982 refined with REFMAC5<sup>76</sup> and PHENIX<sup>77</sup>. Model building was performed using COOT<sup>78</sup>.

#### 983 **Peptide Synthesis**

984 Wild Type and mutant peptides corresponding to residues 550-576 (Long) or 558-576 (Short) of FNIP2  
985 were ordered from New England Peptide. All peptides were purified to >99% purity, with the exception  
986 of the WT Long FNIP2 peptide that was purified to 70% purity. 5 mg of each short peptide was  
987 resuspended in water to a concentration of 500 μM, whereas 5 mg aliquots of long peptides were  
988 resuspended in water supplemented with 3 μL of 1M ammonium bicarbonate to a final concentration of  
989 500 μM.

#### 990 **Measurement of *in vitro* binding kinetics of GABARAP and LC3B with FLCN/FNIP2 by Surface Plasmon** 991 **Resonance (SPR)**

992 Direct binding of GABARAP and LC3B to immobilized FLCN/FNIP2 was assayed on a Biacore S200 (Cytiva)  
993 using the Biotin CAPture Kit (Series S Sensor Chip CAP and Biotin CAPture reagent) (Cytiva). Prior to  
994 beginning each run, the S200 system was equilibrated using a 4x Multiprime of running buffer (1x HBS-P+  
995 (Cytiva) supplemented with 1 mM TCEP). The chip surface was conditioned with three successive 60  
996 second pulses of 6M Guanidine HCl / 50 mM NaOH at a flow rate of 30 μL/min. Prior to kinetic analysis,  
997 three startup cycles were performed using standard conditions for the CAPture Kit (Cytiva). For each cycle  
998 of kinetic analysis, undiluted Biotin CAPture reagent was injected onto all four flow cells for 150 seconds  
999 at a flow rate of 4 μL /min. 40 μg/mL Biotinylated FLCN-8xGlycine-AviTag/FNIP2 was injected onto flow  
1000 cells 2 and 4 at 10 μL/min for 60 seconds to produce an immobilization level of 100-150 Response Units

1001 (RU). 0.06 – 31.25 nM GABARAP or 0.06 to 4000 nM LC3B protein was injected using “High performance  
1002 Multi-cycle Kinetics” or “Single Cycle Kinetics” injections for 60 seconds at a flow rate of 100  $\mu$ L/min, and  
1003 were allowed to dissociate from FLCN/FNIP2 for 750 seconds prior to regeneration of the chip surface  
1004 with 30 second pulses of 6M Guanidine HCl / 50 mM NaOH followed by 30% Acetonitrile / 250 mM NaOH.

1005 Sensorgrams were processed with Cytiva Biacore S200 Evaluation Software (version 1.1, Build 28). Double  
1006 referencing was performed by first subtracting the GABARAP/LC3B responses over the reference flow cells  
1007 (1 and 3) from the corresponding responses in sample flow cells (2 and 4, respectively), followed by  
1008 subtraction of averaged sensorgrams for 0 nM GABARAP/LC3B from sensorgrams corresponding to all  
1009 other concentrations of GABARAP/LC3B. After double referencing kinetic data, injection and pump spikes  
1010 were manually removed from sensorgrams and the data were fit globally by non-linear regression to a  
1011 simple 1:1 Langmuir binding model without a Bulk RI term ( $RI = 0$  RU) to determine  
1012 association/dissociation rate constants ( $k_a$ ,  $k_d$ ), analyte binding capacity ( $R_{max}$ ) and the equilibrium  
1013 dissociation constant ( $K_D$ ).  $R_{max}$  values obtained during kinetic analysis represented 50-80% of the  
1014 theoretical  $R_{max}$  value indicating a surface activity of 50-80%. Sensorgrams and 1:1 binding model curve  
1015 fits were exported from the S200 Evaluation Software and replotted in GraphPad Prism (v8.4.3).

1016 **Measurement of *in vitro* binding kinetics of GABARAP and LC3B with the p62 FIR 4P Domain by Surface**  
1017 **Plasmon Resonance (SPR)**

1018 Direct binding of GABARAP and LC3B to immobilized GST-p62 FIR 4P protein was assayed on a Biacore  
1019 S200 (Cytiva) using a CM5 chip (Cytiva). Prior to beginning each run, the S200 system was equilibrated  
1020 using a 4x Multiprime of 1x HBS-N buffer (Cytiva). The CM5 chip surface was preconditioned using five  
1021 cycles of successive 60 second injections of 50 mM NaOH, 100 mM HCl, 0.2% SDS and nuclease free water  
1022 at 30  $\mu$ L/min. GST-p62 FIR 4P (Sample cells, 2 and 4) or GST (Reference cells, 1 and 3) were covalently  
1023 coupled to the chip surface using NHS/EDC supplied in the Cytiva Amine Coupling Kit. GST-p62 and GST  
1024 (Cytiva) were diluted to 0.1  $\mu$ M in 10 mM Sodium Acetate, pH 4.5 and injected onto flow cells 2 and 4  
1025 (GST-p62) or 1 and 3 (GST) of the NHS/EDC activated chip until 250 RU of GST-p62 or 200 RU of GST was  
1026 immobilized. Ethanolamine was then injected across all four flow cells according to the Amine Coupling  
1027 Kit protocol to block remaining reactive sites on the chip surface.

1028 The SPR system was then equilibrated using a 4x Multiprime of running buffer (1x HBS-P+ (Cytiva)  
1029 supplemented with 1 mM TCEP). Prior to kinetic analysis, ten startup cycles were performed using 60  
1030 second sample injections of running buffer at 30  $\mu$ L/min and 30 second dissociation times followed by  
1031 two 30 second injections of pH 2.0 Glycine (Cytiva) at 30  $\mu$ L/min and a “Carry-over control” injection. For  
1032 each cycle of kinetic analysis, 40 – 10,000 nM GABARAP or LC3B protein was injected across all four flow  
1033 cells using “High performance Multi-cycle Kinetics” injections for 60 seconds at a flow rate of 100  $\mu$ L/min,  
1034 and were allowed to dissociate from GST-p62 FIR 4P and GST surfaces for 1000 seconds prior to  
1035 regeneration of the chip surface with two 30 second injections of pH 2.0 Glycine (Cytiva) at 30  $\mu$ L/min  
1036 followed by a 300 second stabilization period and a “Carry-over control” injection.

1037 Sensorgrams were processed with Cytiva Biacore S200 Evaluation Software as described above. While  
1038 sensorgrams for LC3B binding to GST-p62 FIR 4P domain showed high affinity binding with a very slow off  
1039 rate (Estimated 80 nM  $K_D$  with 1200 second half life), they were more complicated than could be  
1040 accurately described using a simple 1:1 Langmuir binding model with a Bulk RI term. In spite of their  
1041 complexity the LC3B sensorgrams and sensorgrams for GABARAP binding to GST-p62 reached a steady  
1042 state during injection onto the chip surface and were fit using a “Steady State Affinity Model” with the  
1043 offset parameter set to zero.  $R_{max}$  values obtained during steady state affinity analysis represented ~85%

1044 of the theoretical  $R_{max}$  value indicating a surface activity of ~85%. Sensorgrams and steady state affinity  
1045 binding isotherm fits were exported from the S200 Evaluation Software and replotted in GraphPad Prism  
1046 (v8.4.3).

1047 **Measurement of the Affinity of p62, FLCN/FNIP1 and FNIP2 Peptides for GABARAP by Competition in**  
1048 **Solution / Affinity in Solution Surface Plasmon Resonance (SPR)**

1049 We used the 'Competition in solution' (also called 'affinity in solution') method<sup>79-81</sup> to measure the affinity  
1050 of the GST-p62 FIR 4P domain, full length FLCN/FNIP1 protein and FNIP2 Peptide (New England Peptide)  
1051 competitors for GABARAP. Full length AviTag-FLCN/FNIP2 heterodimers were immobilized on the Series S  
1052 Sensor Chip CAP surface (as described above for FLCN/FNIP binding kinetics with GABARAP and LC3B) and  
1053 used to capture and measure the concentration of free GABARAP in pre-equilibrated mixtures containing a  
1054 constant amount of GABARAP with varying amounts of soluble p62, FLCN/FNIP1 and FNIP2 peptide  
1055 competitors.

1056 Calibration curves of 0 - 15.6 nM GABARAP were prepared by two-fold serial dilution of 31.2 nM GABARAP  
1057 into running buffer (1x HBS-P+ buffer (Cytiva) supplemented with 1 mM TCEP). Calibration curves of  
1058 GABARAP were injected onto the chip surface for 60 seconds at 30  $\mu$ L/min and the maximum RU for each  
1059 concentration of GABARAP was recorded. Following sample injections, the chip surface was regenerated  
1060 by injecting one 30 second pulse of 6M Guanidine Hydrochloride with 0.25 M NaOH and a second 30  
1061 second pulse of 30% acetonitrile with 0.25 M NaOH, followed by a 'carry over control injection'.

1062 Mixtures containing a fixed amount of GABARAP (7.8 nM) and soluble GST-p62 FIR, FLCN/FNIP1 protein  
1063 and FNIP2 peptide competitors were prepared by 1:1 dilution of 15.6 nM GABARAP with two-fold serial  
1064 dilutions of competitors in running buffer. Each mixture of GABARAP and competitor was injected to  
1065 produce a series of sensorgrams that were recorded as described for the GABARAP calibration curve.

1066 Sensorgrams were processed with Cytiva Biacore S200 Evaluation Software (version 1.1, Build 28). Double  
1067 referencing was performed by first subtracting the GABARAP/LC3B responses over the reference flow cells  
1068 (1 and 3) from the corresponding responses in sample flow cells (2 and 4, respectively), followed by  
1069 subtraction of averaged sensorgrams for 0 nM GABARAP/LC3B from sensorgrams corresponding to all  
1070 other concentrations of GABARAP/LC3B.

1071 Sensorgrams were processed with the Cytiva Biacore S200 Evaluation Software. The y-axes were zeroed  
1072 at the baseline for each cycle and x-axes were aligned at the injection start. Bulk refractive index changes  
1073 and systematic deviations in sensorgrams were removed by double referencing as described above. The  
1074 concentration of free GABARAP in each mixture with competitors was determined from the calibration  
1075 curve, exported into Prism, plotted against the log of competitor concentration and fit to the equation  
1076 detailed on page 192 of the Biacore S200 Software Handbook (Revision 29-1431-08 AA). The equation  
1077 assumes the existence of a single binding site between FLCN/FNIP2 competitors and GABARAP.

1078 **Bacterial strains and infections**

1079 Infections were performed with wild-type *S. Typhimurium* SL1344 and isogenic mutant lacking the SopF  
1080 effector. Mutation in the *S. Typhimurium* SL1344 background lacking SopF ( $\Delta$ sopF) was a kind gift from  
1081 Dr. Feng Shao and described previously<sup>25</sup>. A previously established approach was used for infection of  
1082 epithelial cells, using late-log *S. Typhimurium* cultures as inocula<sup>82</sup>. Briefly, subcultured *Salmonella*  
1083 strains were pelleted at 10,000g for 2 min, resuspended and diluted 1:50 in PBS, pH 7.2, and added to  
1084 cells for 10 min at 37 °C. Selection for intracellular bacteria was performed at 30 min p.i. using 100  $\mu$ g

1085 ml<sup>-1</sup> gentamicin, a concentration that was decreased to 10 µg ml<sup>-1</sup> at 2 h p.i. for maintenance purposes.  
1086 If applicable, cells were fixed with 4% paraformaldehyde in PBS at 37 °C for 10 min.

1087 **Supplemental References:**

- 1088 63. Abu-Remaileh, M., et al., Lysosomal metabolomics reveals v-ATPase and mTOR-dependent  
1089 regulation of amino acid efflux from lysosomes. *Science*. **358**: 807-813 (2017).
- 1090 64. Brumell, J.H., Rosenberger, C.M., Gotto, G.T., Marcus, S.L., and B.B., Finlay. SifA permits survival and  
1091 replication of Salmonella typhimurium in murine macrophages. *Cell Microbiol.* **3**, 75-84 (2001).  
1092
- 1093 65. Kishi-Itakura, C., et al., Ultrastructural analysis of autophagosome organization using mammalian  
1094 autophagy-deficient cells. *J Cell Sci.* **127**, 4089-4102 (2014).
- 1095 66. Kishi-Itakura, C., and F., Buss. The use of correlative light-electron microscopy (CLEM) to study  
1096 PINK1/Parkin-mediated mitophagy. *Methods Mol Biol.* **1759**, 29-39 (2018).
- 1097 67. McCarthy, D.J., et al., Differential expression analysis of multifactor RNA-seq experiments with  
1098 respect to biological variation. *Nuc Acid Res.* **40**, 4288-97 (2012).
- 1099 68. Bouziat, R., et al., Reovirus infection triggers inflammatory responses to dietary antigens and  
1100 development of celiac disease. *Science*. **356**, 44-50 (2017).
- 1101 69. Bouziat, R., et al., Murine norovirus infection induces TH1 inflammatory responses to dietary  
1102 antigens. *Cell Host Microbe*. **24**, 677-688 (2018).
- 1103 70. DeJesus, R., et al., Functional CRISPR screening identifies the ufmylation pathway as a regulator of  
1104 SQSTM1/p62. *eLife*. **5**, e17290 (2016).
- 1105 71. Lystad, A.H., et al., Distinct functions of ATG16L1 isoforms in membrane binding and LC3B lipidation  
1106 in autophagy-related processes. *Nat Cell Biol.* **21**, 372-383 (2019).
- 1107 72. Turco, E., et al., FIP200 Claw domain binding to p62 promotes autophagosome formation at ubiquitin  
1108 condensates. *Mol Cell.* **74**, 330-46 (2019).
- 1109 73. Kabsch W. XDS. *Acta Crystallogr D Biol Crystallogr.* **66**, 125-32. doi: 10.1107/S0907444909047337  
1110 (2010).
- 1111 74. Evans, P.R., and G.N. Murshudov., How good are my data and what is the resolution? *Acta Crystallogr*  
1112 *D Biol Crystallogr.* **69**, 1204-14 (2013).
- 1113 75. McCoy, A.J., et al., Phaser crystallographic software. *J Appl Crystallogr.* **40**, 658-674 (2007).
- 1114 76. Murshudov, G.N., et al., REFMAC5 for the refinement of macromolecular crystal structures. *Acta*  
1115 *Crystallogr D Biol Crystallogr.* 2011 Apr;**67**, 355-67 (2011).
- 1116 77. Adams, P.D., et al., PHENIX: a comprehensive Python-based system for macromolecular structure  
1117 solution. *Acta Crystallogr D Biol Crystallogr.* **66**, 213-21 (2010).

- 1118 78. Emsley, P., et al., Features and development of Coot. *Acta Crystallogr D Biol Crystallogr.* **66**, 486-501  
1119 (2010).
- 1120 79. Nieba, L., et al., Competition BIAcore for measuring true affinities: large differences from values  
1121 determined from binding kinetics. *Analytical Biochemistry.* **234**, 155–165 (1996).
- 1122 80. Lazar, G.A., et al., Engineered antibody Fc variants with enhanced effector function. *Proc. Natl. Acad.*  
1123 *Sci.* **103**, 4005–4010 (2006).
- 1124 81. Walkup, W.G., et al., A model for regulation by synGAP- $\alpha$ 1 of binding of synaptic proteins to PDZ-  
1125 domain ‘Slots’ in the postsynaptic density. *eLife.* **5**, e16813 (2016).
- 1126 82. Szeto, J., et al., Salmonella-containing vacuoles display centrifugal movement associated with cell-to-  
1127 cell transfer in epithelial cells. *Infect Immun.* **77**, 996-1007 (2009)

1128

### 1129 **Acknowledgements:**

1130 We would like to thank Drs. James Hurley, Sascha Martens, Keith Dionne, Frank Gentile, Bob  
1131 Tepper, and the employees of Casma Therapeutics for critical feedback in preparation of this  
1132 manuscript. We thank all staff in the Biological Support Unit at the Babraham Institute for their  
1133 outstanding care of our mouse colony and Dr Simon Walker in the Imaging Facility for his  
1134 support. We thank Dr Domink Spensberger for his role in generating the K490A mouse and Dr  
1135 Elise Jacquin for early work on vATPase. We thank Dr Anne Simonsen for providing the  
1136 ATG16L1 KO RAW264.7 cell line. This work was supported by grants from the BBSRC,  
1137 BB/P013384/1 (BBS/E/B/000C0432 and BBS/E/B/000C0434), BB/R019258/1, Cancer Research  
1138 UK Career Development award C47718/A16337 and the Canadian Institutes of Health Research  
1139 (FDN#154329 to J.H.B). J.H.B. holds the Pitblado Chair in Cell Biology.

1140

### 1141 **Author Contributions:**

1142 J.M.G., L.O.M, and O.F designed all experiments and wrote the manuscript. J.M.G., W.G.W. IV,  
1143 K.H., T.L., and S.K performed experiments. K.F. and O.F. generated the ATG16L1 K490A  
1144 knockin mouse model. A.N. performed data analysis of RNAseq profiling, A.J, A.A., S.R.B., and  
1145 S.R.R. performed calcium imaging experiments. C.K-I. performed ultrastructural analysis. J.G.F.  
1146 provided chemistry support. M.W., B.A., and D.B. performed protein purification and complex  
1147 formation assays. A.B. provided valuable scientific guidance throughout the study.

1148

### 1149 **Competing Financial Interest**

1150 J.M.G., W.G.W. IV, A.N., T.L., S.K., A.J., J.G.F., D.B., B.A.A., J.S., and L.O.M. are employees  
1151 and shareholders of Casma Therapeutics. A.B. is a scientific co-founder of Casma Therapeutics  
1152 and is a shareholder.



1153 **Figure 1. Activation of the lysosomal ion channel TRPML1 results in ATG8 conjugation to the lysosomal**  
1154 **membrane independent of autophagy.**

1155 **(a)** Western blot analysis of LC3 lipidation kinetics upon treatment with the mTOR inhibitor AZD8055 or  
1156 the TRPML1 agonists MK6-83 (25uM) or C8 (2uM) for the indicated timepoints. **(b)** Time-lapse imaging  
1157 of GFP-LC3B in WT or ATG13\_KO HEK293T cells. Cells were treated with C8 (2uM) or AZD8055 (1uM).  
1158 Still images at the indicated timepoints (min) are shown. **(c)** Western blot analysis of LC3 lipidation  
1159 sensitivity to either BafA1 (100nM) or PIK-III (5uM). Cells were cotreated with the indicated compounds  
1160 for 2hr. **(d)** Colocalization analysis of GFP-tagged ATG8 homologs with the lysosomal marker LAMP1-RFP  
1161 in WT HEK293T cells after treatment with C8 (2uM). **(e)** Quantification of GFP-LC3B puncta number in  
1162 WT or ATG13\_KO HEK293T cells treated with AZD8055 (1uM) or C8 (2uM). **(f)** Quantification of acute  
1163 GFP-LC3B colocalization with RFP-LAMP1 in WT and ATG13\_KO HEK293T cells. **(g)** Immunofluorescence  
1164 analysis of GFP-LC3B puncta formation in WT HEK293T, ATG13\_KO, ATG13/ATG16L1\_DKO, and DKO  
1165 cells rescued with either WT- or K490A-ATG16L1. Treatment with AZD8055 displayed puncta only in  
1166 autophagy-competent cells, whereas the TRPML1 agonist treatment formed puncta in autophagy-  
1167 deficient cells dependent on the ability of ATG16L1 to interact with single membrane structures. **(h)**  
1168 Ultrastructural CLEM, FIB-SEM analysis of GFP-LC3B positive cells in HEK293T cells of the indicated  
1169 genotype. CLEM representative images shown in optimal X/Y resolution. Zoom FIB-SEM images shown in  
1170 X/Z plane. **(i)** Primary BMDM were treated with the indicated compounds for 1 hr and immunostained  
1171 for LC3B and the lysosomal marker LAMP1. LC3 puncta generation with AZD8055 was preserved in both  
1172 genotypes. **(j)** Diagram of SopF impairment of ATG16L1 recruitment by the vATPase. **(k)** Expression of  
1173 SopF (+DOX) in HeLa cells blocks LC3A/B lipidation upon TRPML1 activation but does not impact  
1174 autophagosome biogenesis stimulated by AZD8055.

1175

1176 **Figure 2. ATG16L1-dependent ATG8 conjugation to single membranes is required for TFEB activation**  
1177 **and lysosomal biogenesis upon TRPML1 activation.**

1178 **(a)** Western blot analysis of TFEB phosphorylation and active state reveals that TRPML1 activation of  
1179 TFEB requires the vATPase. HeLa cells were treated with the indicated compounds for 90 min. **(b)**  
1180 CRISPR knockout of the indicated genes in HeLa cells stably expressing Cas9. TRPML1 agonist induced  
1181 TFEB activation in autophagy-deficient cells, yet was dependent upon the genes required for ATG8  
1182 conjugation. **(c)** TFEB activation by a TRPML1 agonist is sensitive to ATG16L1\_KO or BafA1 cotreatment,  
1183 whereas neither of these conditions affects TFEB activation upon nutrient starvation. HeLa\_CTRL\_KO and  
1184 ATG16L1\_KO cells were treated as indicated. **(d)** Western blot analysis of HeLa cells of the indicated  
1185 genotype expressing variants of ATG16L1. TFEB activation was strictly dependent of the ability of the  
1186 ATG16L1 C-terminal WD repeats to interact with single membranes. **(e)** Primary BMDM of the indicated  
1187 genotype were treated with 2uM C8 for 1 hr and immunostained for endogenous TFEB localization.  
1188 Nuclear localization was impaired in the ATG16L1<sup>K490A</sup> cells. **(f)** Quantification of nuclear/cytosolic ratio  
1189 of TFEB in primary macrophages of the indicated genotype upon C8 treatment. **(g)** RNAseq  
1190 transcriptomics profiling of genes induced by C8 compound stimulation for 24h in ATG16L1 KO and WT  
1191 HeLa cells (expressing Cas9). The Venn diagram shows a large proportion (80%) of C8-induced genes  
1192 that were also ATG16L1 dependent. The heatmap shows Log<sub>2</sub>(CPM)-derived values for these genes,  
1193 expressed as Z-transformed signed difference ratios (SDR) relative to their respective unstimulated  
1194 baseline controls (either ATG16L1 KO or WT) and then scaled by normalizing to the maximum absolute  
1195 deviation of each gene's expression level from the unstimulated control. Differentially induced genes

1196 were identified by having a fold change (FC) >1.5 and Benjamini and Hochberg's (BH)-adjusted  $p < 0.05$ .  
1197 **(h)** Expression analysis of TFEB target gene panel, which was induced upon TRPML1 agonist (C8)  
1198 treatment but not in TRPML1\_KO and TFEB/TFE3\_DKO cells, which were used to highlight specificity of  
1199 response. RNAseq was performed in triplicates. **(i)** Prolonged treatment with TRPML1 agonist induces  
1200 lysosomal biogenesis dependent on ATG16L1. U2OS cells of the indicated genotype were treated for 24  
1201 hours before staining of the cells with LysoTracker dye. Representative images shown. **(j)** Quantification  
1202 of LysoTracker staining organelle count after 24 hr treatment with the indicated compounds. Fold  
1203 change organelles per cell  $\pm$  SD.

1204

1205 **Figure 3. GABARAP is required for TFEB activation and FLCN-FNIP sequestration upon acute TRPML1**  
1206 **stimulation.**

1207 **(a)** Combinatorial CRISPR KO of ATG8 homologs in HeLa cells stably expressing Cas9. RAP\_TKO =  
1208 GABARAP, GABARAPL1, and GABARAPL2 knockout. LC3\_TKO = LC3A, LC3B, and LC3C knockout. Western  
1209 blot analysis of cells treated with TRPML1 agonist reveals GABARAP proteins are specifically required for  
1210 TFEB activation. **(b)** GABARAP binds the FLCN-FNIP1 complex. HEK293T cells transiently transfected with  
1211 the indicated constructs for 20hr before lysis and immunoprecipitation. **(c)** Interaction of GABARAP with  
1212 FLCN-FNIP1 complex requires LIR binding motif of GABARAP. HEK293T cells transiently transfected with  
1213 the indicated constructs for 20hr before lysis and immunoprecipitation. LIR binding motif (LBM) mutant  
1214 = K39Q/Y40H/Q74E/F75L. **(d)** GABARAP\_MBP complexes with FLCN/FNIP2 over a Superose 6 column.  
1215 Overlay of individual and complexed chromatograms. **(e)** GABARAP binds FLCN/FNIP2 with picomolar  
1216 affinity (300 pM  $K_D$ ) in single cycle SPR, while LC3B does not show binding to FLCN/FNIP2. **(f)** GABARAP  
1217 binds FLCN/FNIP2 with picomolar affinity in multi-cycle SPR. **(g, h)** GABARAP and **(i, j)** LC3B bind to the  
1218 FIR domain of p62 with equivalent affinity (700 nM  $K_D$ ) in multi-cycle SPR. **(k)** Immunofluorescence  
1219 analysis of U2OS cells treated with TRPML1 agonist for 20 minutes. Images show colocalization between  
1220 endogenous FLCN and LAMP1. **(l)** Western blot analysis of HeLa WT or GABARAP\_TKO membrane  
1221 fractions after treatment with TRPML1 agonist for the indicated timepoints. **(m)** Western blot analysis of  
1222 FLCN-FNIP1 membrane recruitment upon TRPML1 agonist treatment in LAMTOR1\_KO cells. **(n)**  
1223 Purification of lysosomes using LysoIP reveals acute GABARAP-dependent lysosomal FLCN-FNIP  
1224 sequestration. U2OS cells of the indicated genotype were stably transduced with 3XHA-TMEM192  
1225 expression construct. LysoIP was performed after treatment with C8 (2 $\mu$ M, 15 min).

1226

1227 **Figure 4. GABARAP binds the FLCN-FNIP complex through a novel LIR motif-driven interface.**

1228 **(a)** Overview of chemical footprinting assay. GEE and EDC label carboxyl groups of Asp/Glu residues. **(b)**  
1229 Significant protection observed for 3 overlapping peptides in FNIP2. **(c)** Location of putative LIR domain  
1230 within reported FLCN-FNIP2 CryoEM structure. GABARAP binds a region located in an unresolved  
1231 disordered loop, distinct from the RagGTPase binding interface (purple). **(d)** Identified LIR domain is  
1232 required for GABARAP-FNIP1 interaction. HEK293T cells transiently transfected with the indicated  
1233 constructs for 20hr before lysis and immunoprecipitation. LIR mutation = Y583A/V586A. **(e)** Crystal  
1234 structure of FNIP2-GABARAP fusion protein. HP1 pocket shaded in green, HP2 shaded in purple. FNIP2  
1235 LIR motif forms a beta-sheet hairpin structure, with added interactions within the context of the hairpin  
1236 N-terminal to the core LIR motif. **(f)** Representation of similarity between GABARAP and LC3B in the LIR  
1237 docking site. **(g)** Competition SPR of immobilized FLCN/FNIP2 and GABARAP in solution with FLCN/FNIP1  
1238 protein and FNIP2 peptide competitors highlights the essential role of the LIR motif in driving the initial

1239 GABARAP-FLCN/FNIP2 interaction. Regions outside of the LIR result in stabilization and strengthening of  
1240 the interaction. **(h)** Molecular interactions within the FNIP2 hairpin outside the core LIR motif. Key  
1241 residues are underlined. **(i)** Sequence divergence of key underlined residues in LC3B.

1242

1243 **Figure 5. GABARAP-dependent sequestration of FLCN-FNIP complex is required to activate TFEB upon**  
1244 **disruption of endolysosomal ion balance.**

1245 **(a)** Reconstitution of FNIP1/2 double knockout (DKO) cells with either WT or LIR (LIR-mutant  
1246 Y583A/V586A) FNIP1 reveals functional requirement of GABARAP interaction for TRPML1 agonist, but  
1247 not EBSS, activation of TFEB. Western blot analysis of FNIP1 allele series treated with the indicated  
1248 stimuli. l.e = long exposure. **(b)** Quantification of TFEB nuclear localization in WT or LIR expressing  
1249 FNIP1/2\_DKO HeLa cells treated with the indicated stimuli. Analysis was performed using high content  
1250 imaging. Mean  $\pm$  SD. Minimum of 1500 cells quantified per condition. C8 = 2uM. ML-SA5 = 1uM. **(c)**  
1251 Functional TFEB response upon prolonged TRPML1 activation requires FNIP1 LIR domain. Western blot  
1252 analysis of WT or LIR expressing FNIP1/2\_DKO HeLa cells treated with the indicated stimuli. GPNMB is a  
1253 validated TFEB/TFE3 transcriptional target. **(d)** Western blot analysis of membrane fractions from FNIP1  
1254 allele series after acute treatment with TRPML1 agonist for the indicated timepoints.

1255

1256 **Figure 6. GABARAP regulates TFEB activation through FLCN relocalization during selective autophagy.**

1257 **(a)** Parkin is required for robust TFEB activation upon stimulation of mitophagy. HeLa.Cas9 or HeLa.Cas9  
1258 + Parkin cells were treated with the indicated compounds for 4 hr and analyzed by immunofluorescence  
1259 for endogenous TFEB. **(b)** GABARAPs, but not LC3s, are specifically required for TFEB transcriptional  
1260 activity during mitophagy. HeLa cells expressing Parkin and CRISPR KO for the indicated ATG8 family  
1261 members were treated with 0.78 uM valinomycin for 24 hr. **(c)** FNIP LIR motif is required for robust TFEB  
1262 activation upon mitochondrial dysfunction. Cells of the indicated genotype were treated with mitophagy  
1263 inducers for 24 hr. **(d)** Overview of proximity-based mitophagy induction model. Recruitment of p62 to  
1264 mitochondria results in mitophagy independent of chemical disruption of mitochondrial function. **(e)**  
1265 Quantification of mitophagy efficiency using the mKeima flow cytometry assay. U2OS cells expressing  
1266 mKeima, FRB-p62, and FKBP-FIS1 were clonally isolated. Mitophagy = percentage of cells in the  
1267 Keima<sub>acidic</sub> quadrant. Keima<sub>acidic</sub> signal can be fully blocked with BafA1 cotreatment. **(f)** Analysis of TFE3  
1268 and FLCN subcellular localization upon dimerizer induced mitophagy in U2OS cells. Cells of the indicated  
1269 genotype were stimulated with 25nM AP21967 (dimerizer) for 3 hr. TFE3 nuclear localization and FLCN  
1270 punctate structures are seen in CTRL and RB1CC1\_KO (autophagy-deficient) cells but not in  
1271 GABARAP\_TKO cells. **(g)** Analysis of TFEB mobility shift upon challenge with WT or  $\Delta$ sopF *Salmonella*.  
1272 HeLa cells were infected for 30 min with the indicated strain and lysates taken at the indicated  
1273 timepoints post infection. **(h)** Immunofluorescence analysis of nuclear TFEB accumulation upon  
1274 *Salmonella* infection. Cells were infected with the indicated strain as above and analyzed at 2 hours post  
1275 infection (h.p.i.). **(i)** Quantification of TFEB nuclear localization. A minimum of 100 cells were quantified  
1276 per condition. **(j)** GABARAPs are specifically required for TFEB activation upon infection. Cells of the  
1277 indicated genotype were infected with  $\Delta$ sopF *Salmonella* as above and analyzed at 2 h.p.i.. **(k)**  
1278 Quantification of TFEB nuclear localization. A minimum of 100 cells were quantified per condition. **(l)**  
1279 Analysis of TFEB transcriptional activity in cells of the indicated genotype at 10 h.p.i with  $\Delta$ sopF  
1280 *Salmonella*. GPNMB and RRAGD were used as core TFEB target genes. **(m)** Analysis of FLCN recruitment



1281 to *Salmonella* vacuoles. Deletion of GABARAP proteins, but not LC3 family members, blocks the  
1282 relocalization of FLCN.

1283

1284 **Figure 7. GABARAP-dependent membrane sequestration of the FLCN-FNIP complex represents a TFEB**  
1285 **activation paradigm distinct from nutrient starvation.** The FLCN-FNIP GAP complex critically regulates  
1286 the mTOR-dependent phosphorylation and cytosolic retention of the TFEB/TFE3 transcription factors by  
1287 promoting the GDP-bound state of RagC/D. GDP-bound RagC/D directly binds to and presents  
1288 TFEB/TFE3 as a substrate to mTOR (center inset), as described previously. During nutrient starvation **(A)**,  
1289 recruitment of FLCN-FNIP to the lysosomal membrane helps form the lysosomal folliculin complex (LFC),  
1290 which has reduced GAP activity towards RagC/D. This is coincident with mTORC1 inhibition.  
1291 Independently of LFC formation, GABARAP proteins bind directly to the FLCN-FNIP complex and  
1292 sequester it at diverse intracellular membranes **(B)**. This membrane recruitment is required for TFEB  
1293 activation in response to endolysosomal ion disruption (SMAC) and forms of selective autophagy  
1294 (xenophagy and mitophagy). This suggests that FLCN-FNIP regulates cytosolic RagC-GTP and its  
1295 sequestration on intracellular membranes reduces access to this substrate, allowing for nuclear  
1296 retention of TFEB/TFE3 due to impaired Rag binding. Unlike (A), this novel TFEB activation pathway is  
1297 permissive with mTORC1 activity. Subcellular redistribution of the FLCN-FNIP complex to both single and  
1298 double membranes serves to broadly coordinate lysosomal capacity with homeostasis and perturbations  
1299 within the endolysosomal network.

1300

1301

1302

1303

1304

1305

1306

1307

1308

1309

1310

1311

1312

1313

1314

1315

1316

1317

1318

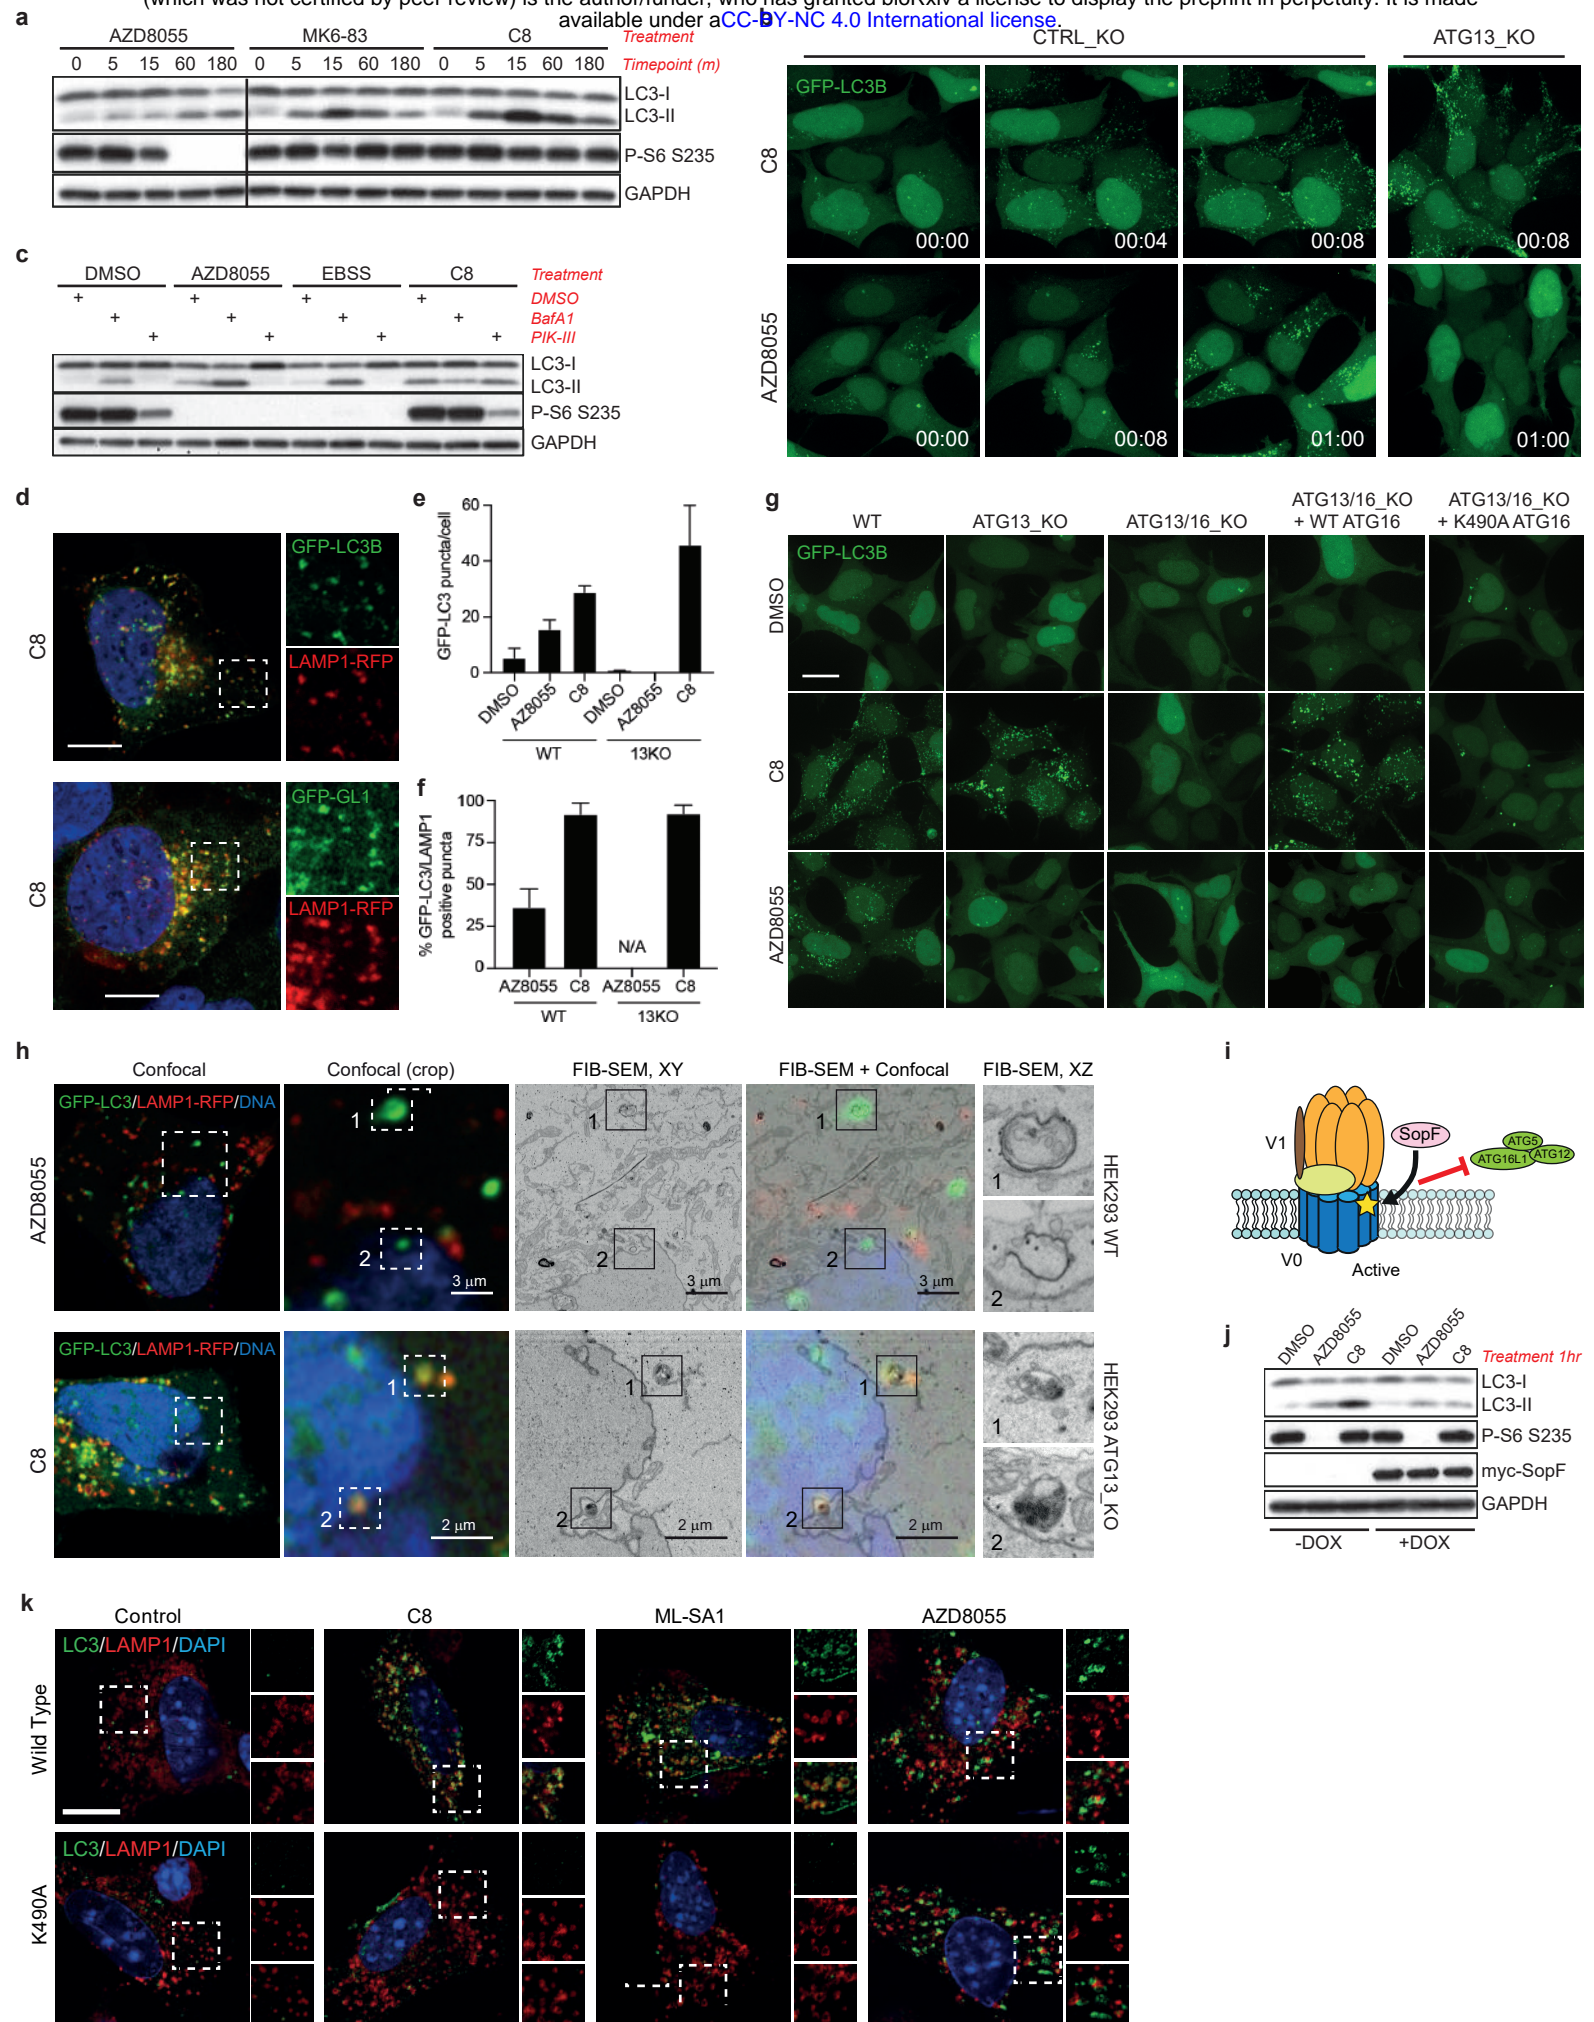

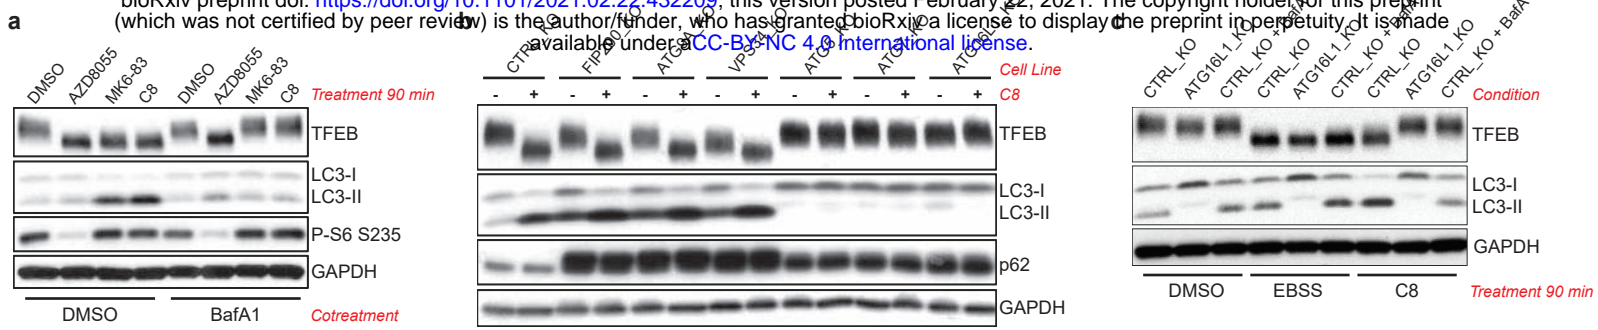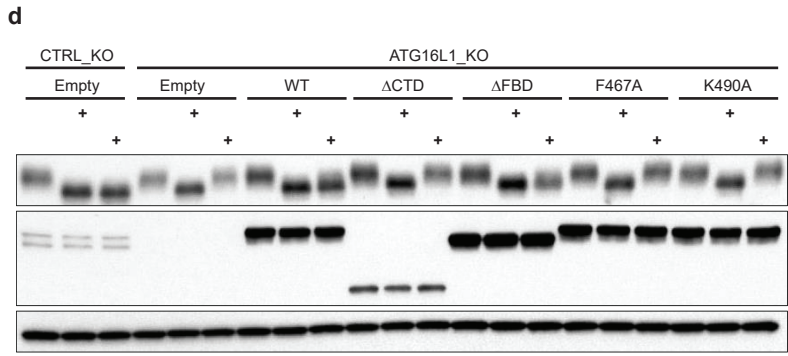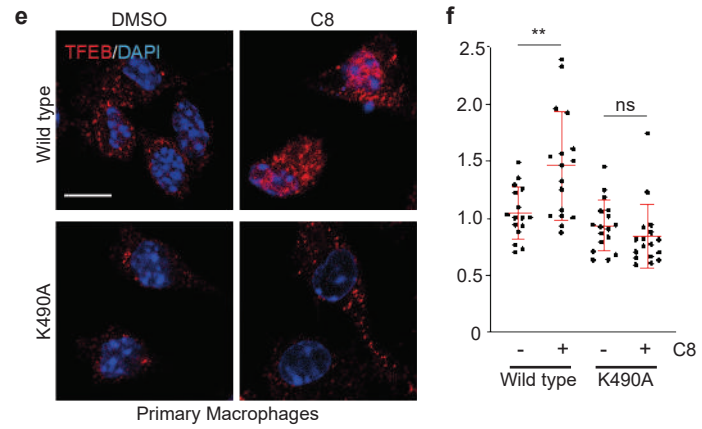

**g**

80% of C8-induced genes are predominantly ATG16L1-dependent

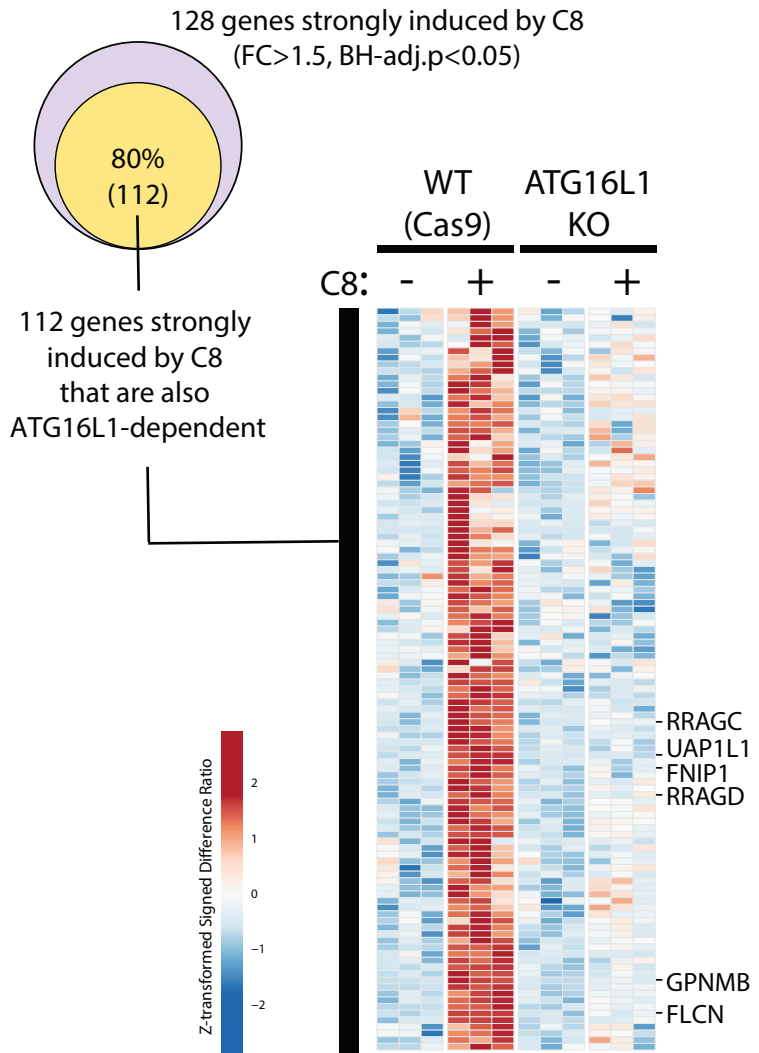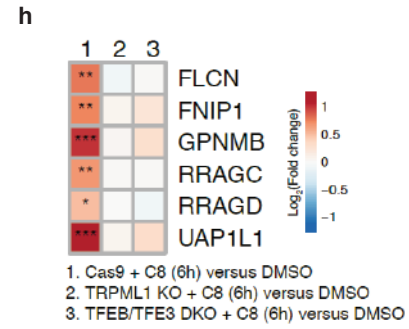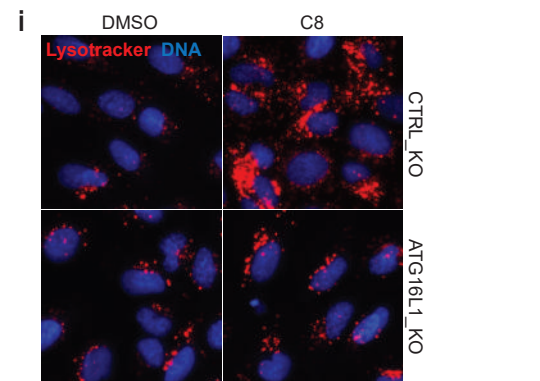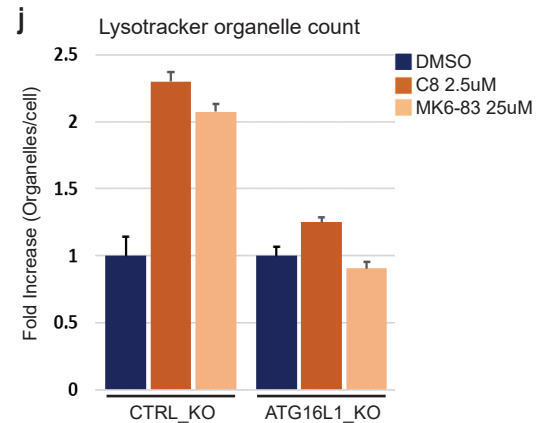



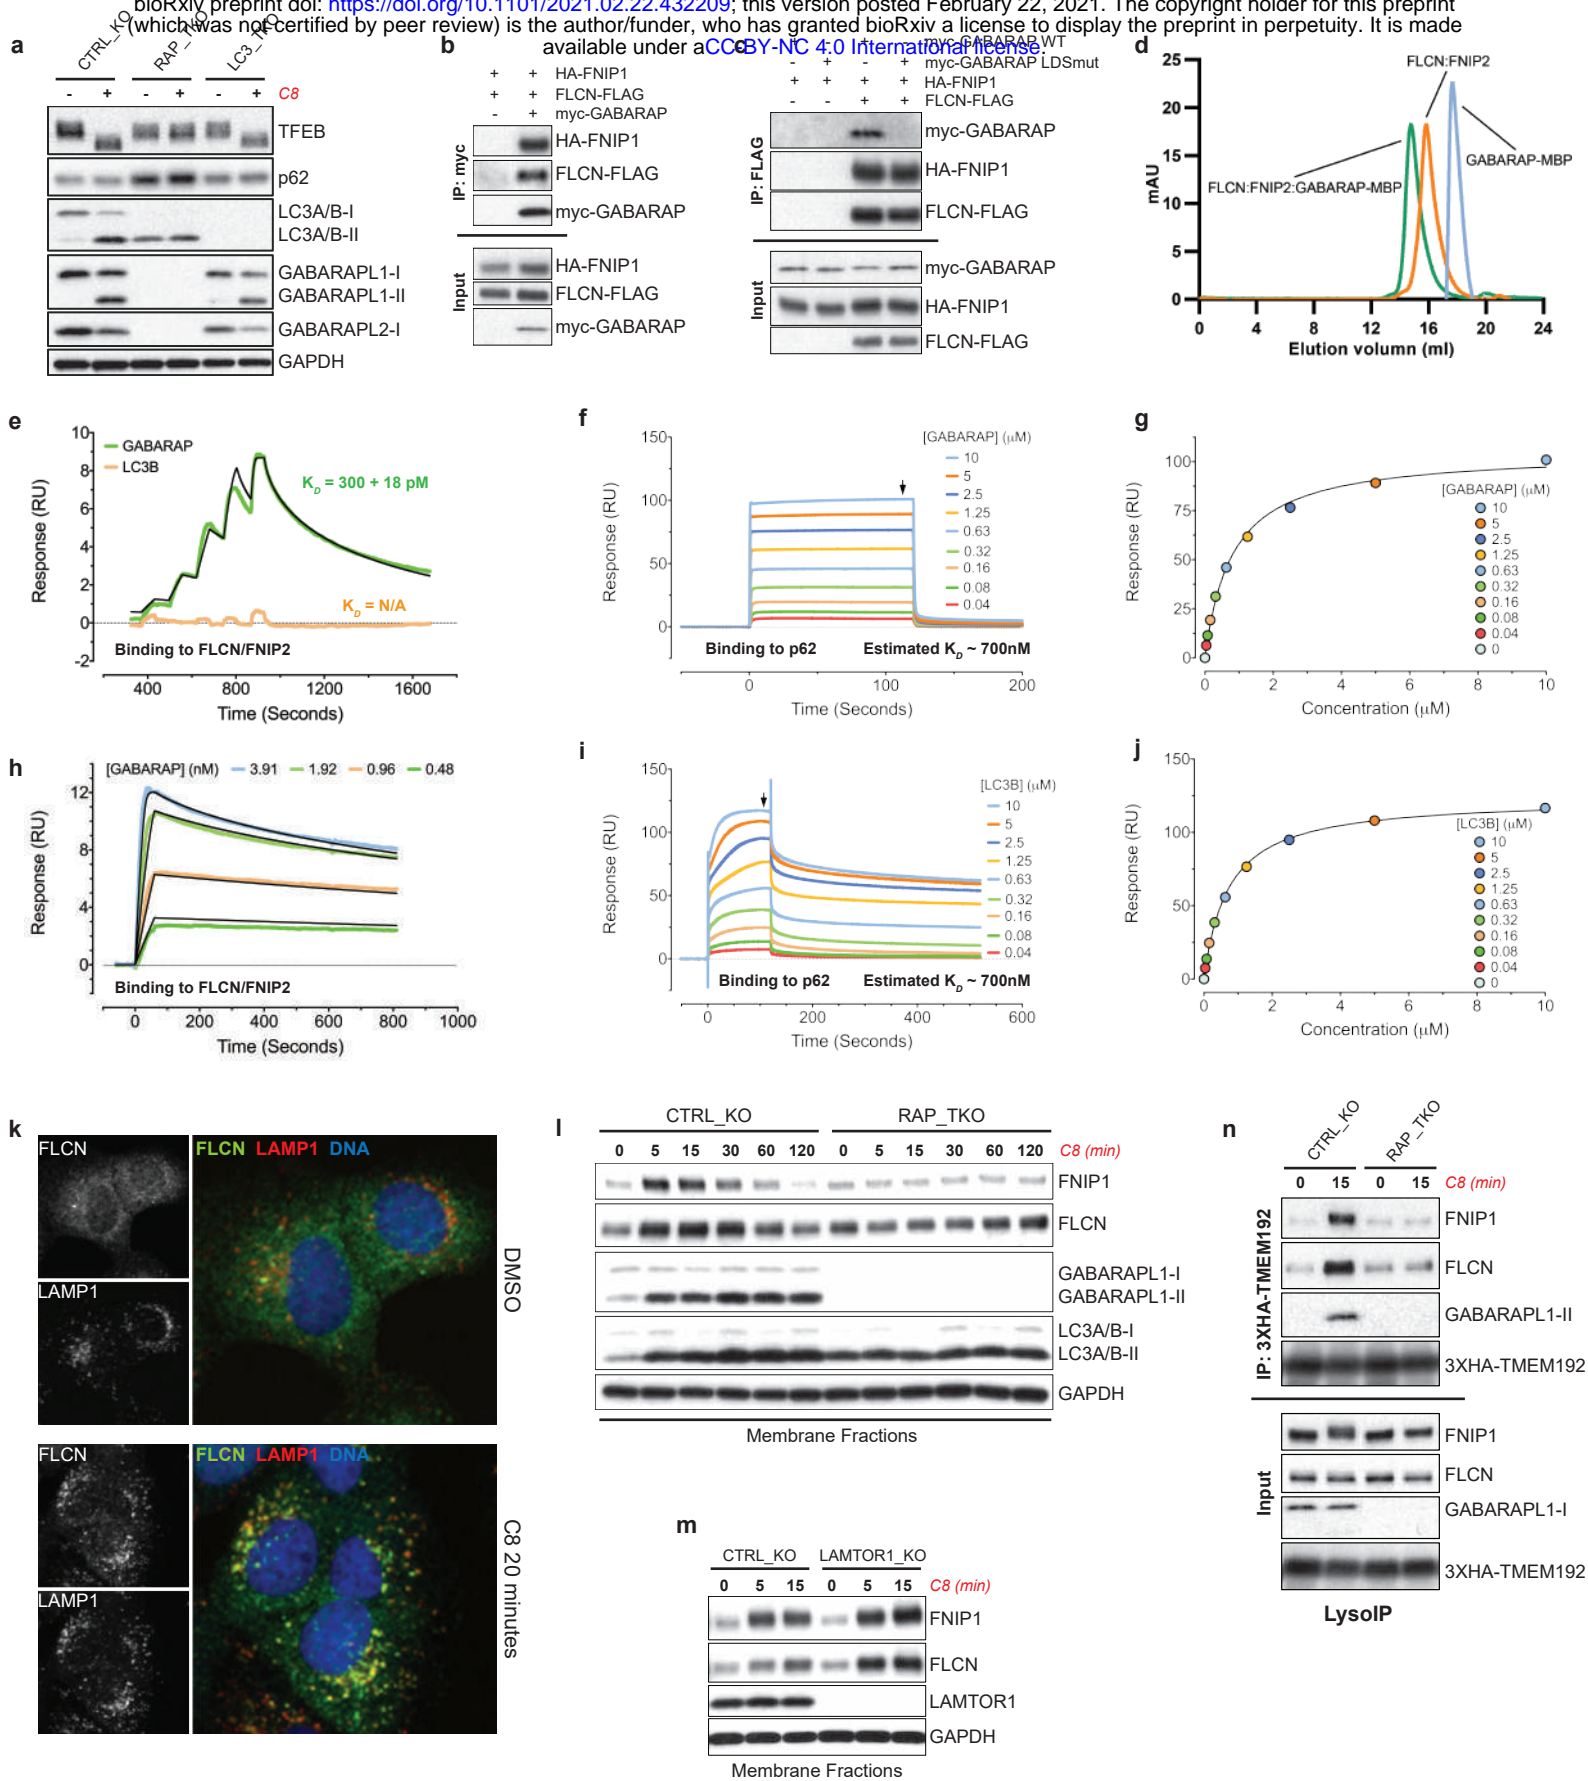

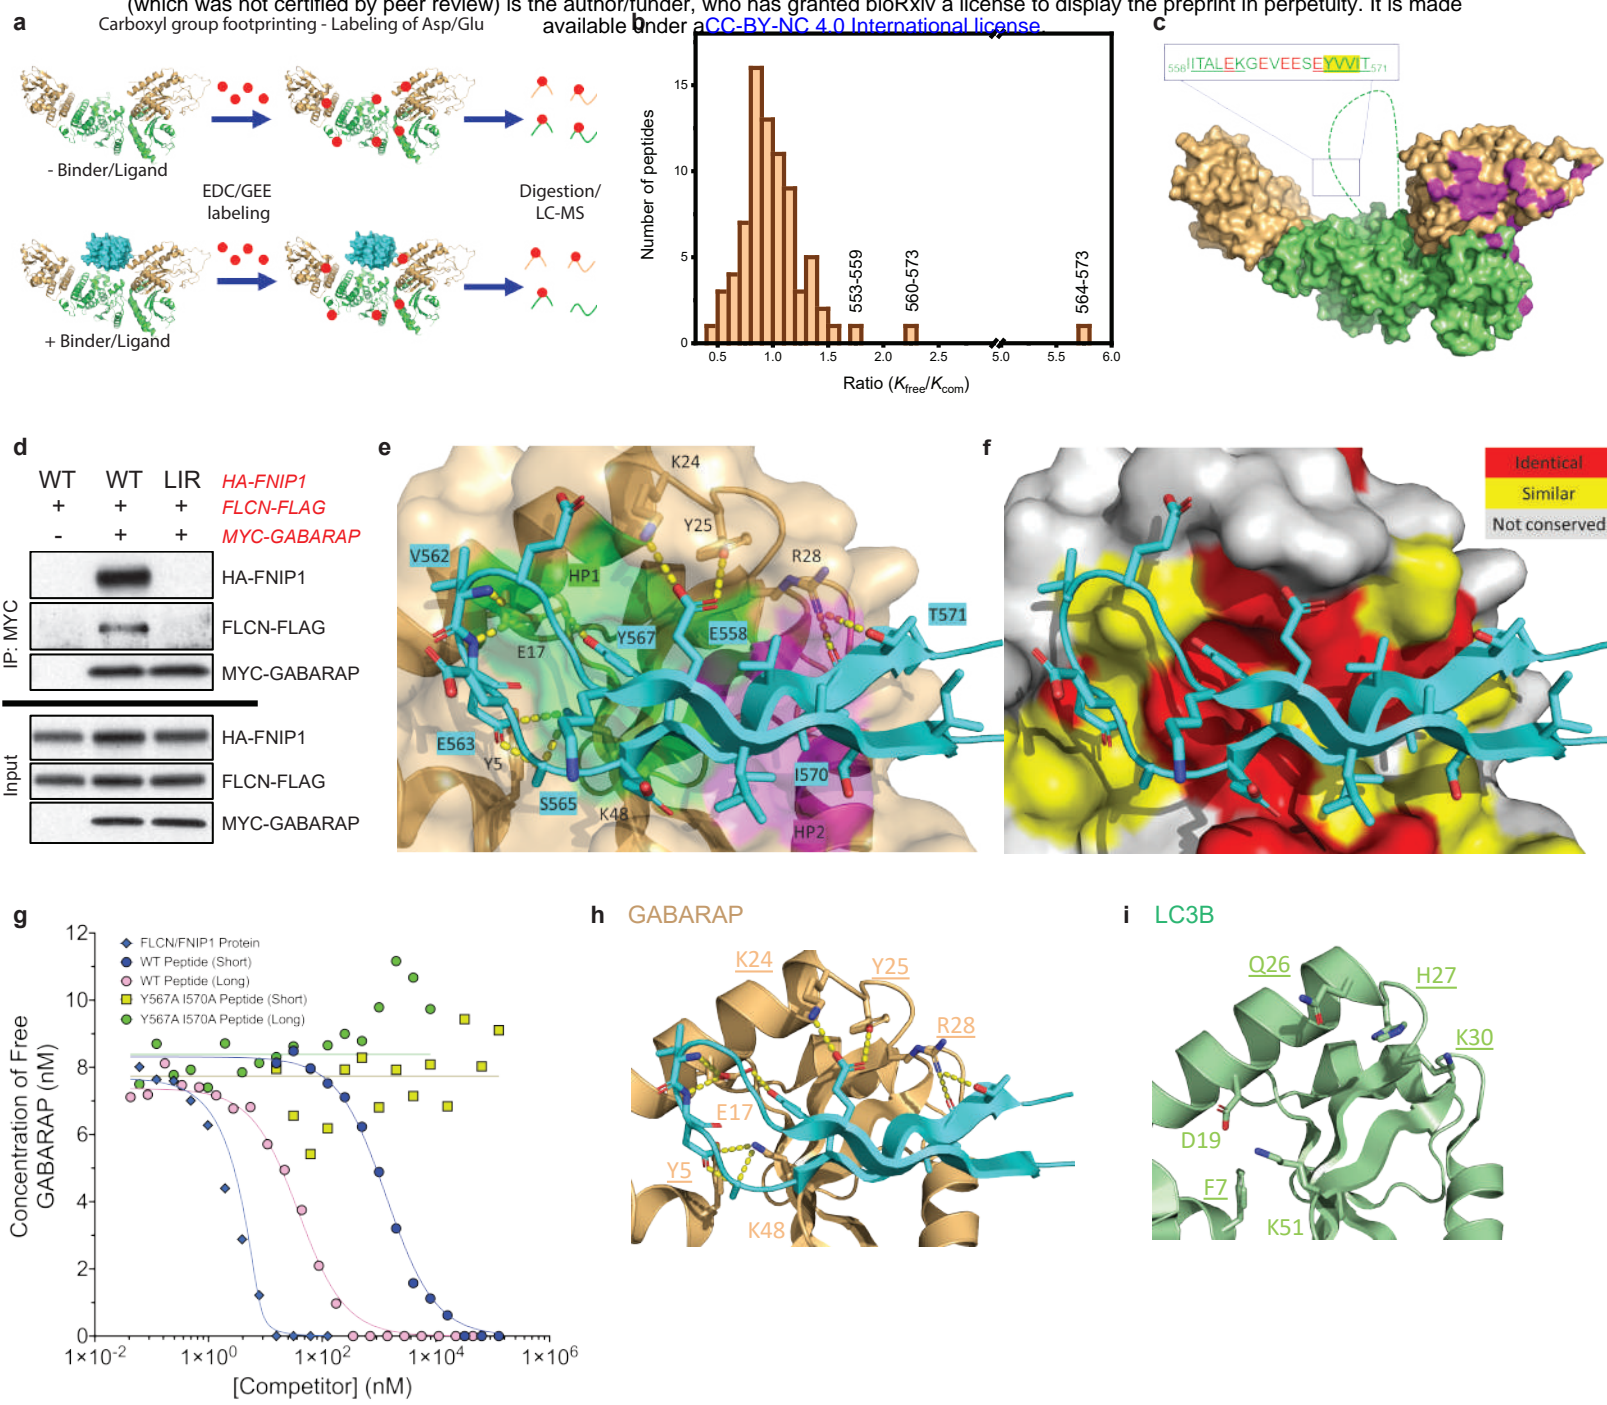

**a**

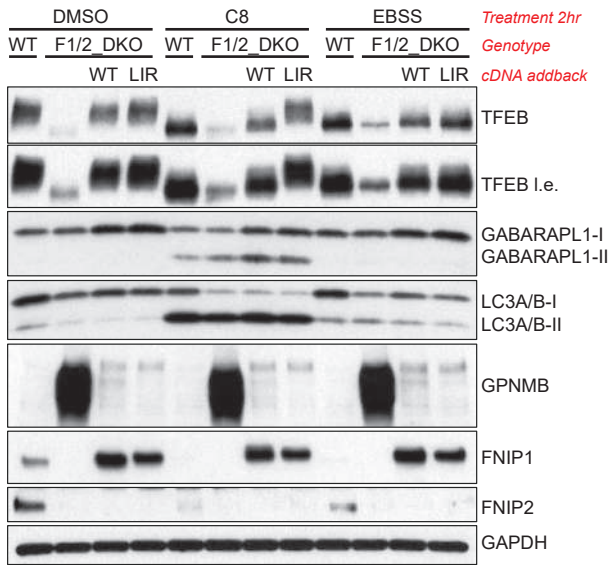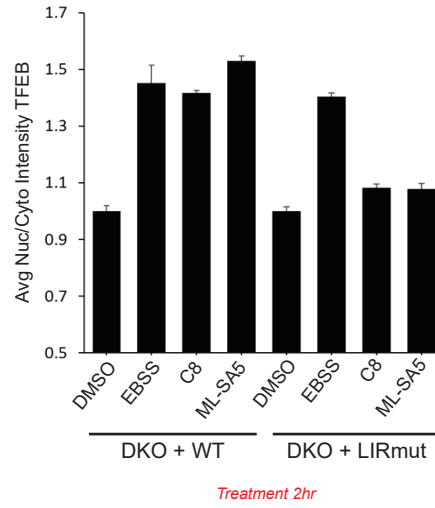

**c**

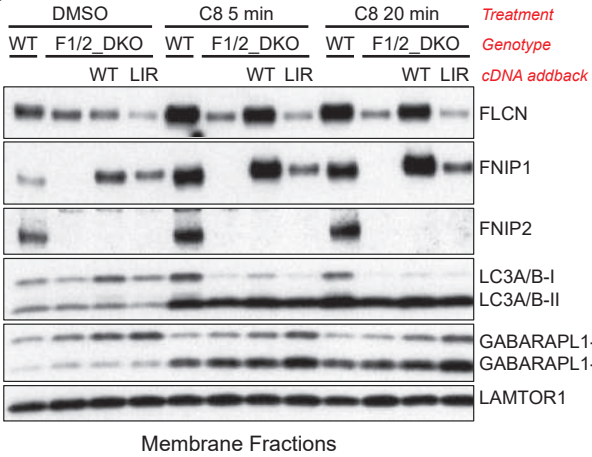

**d**

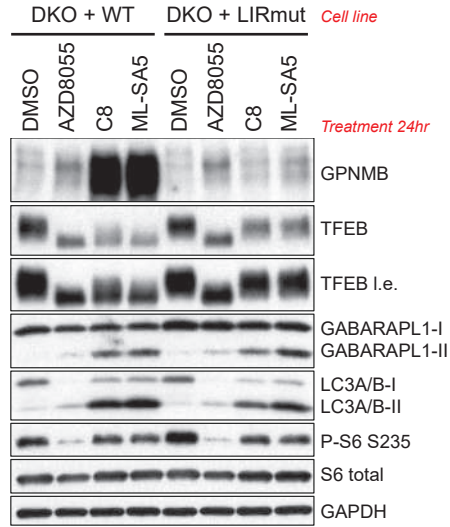



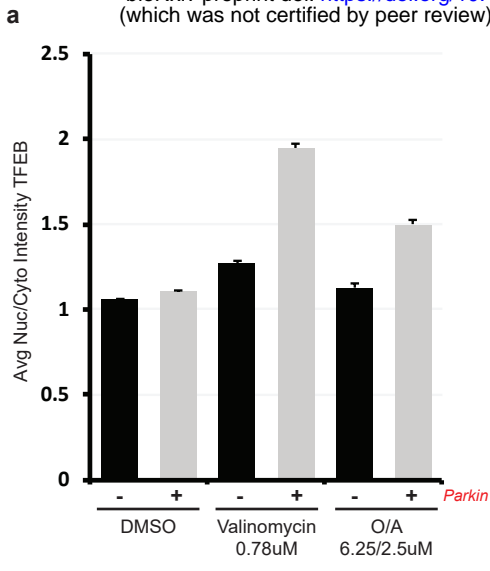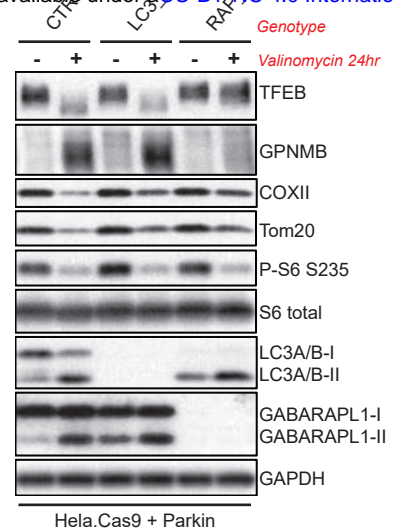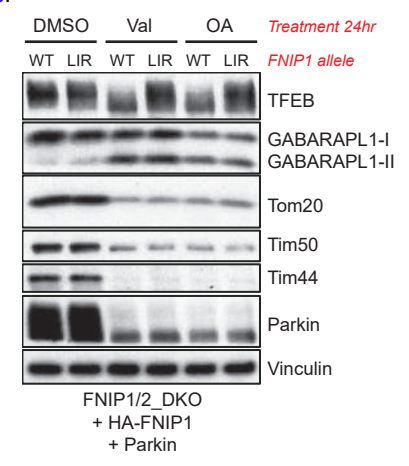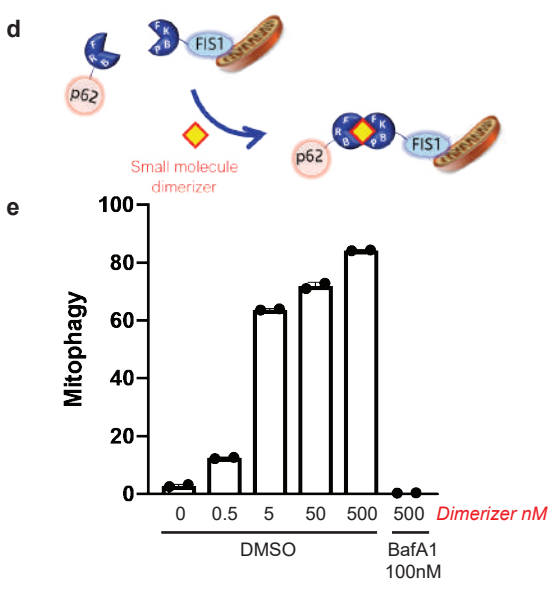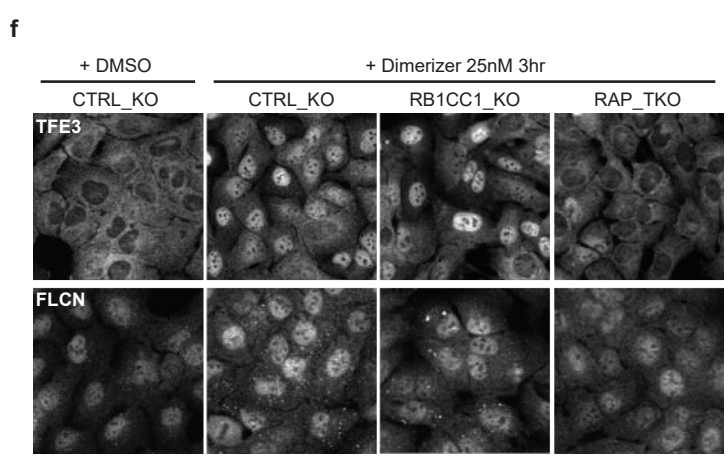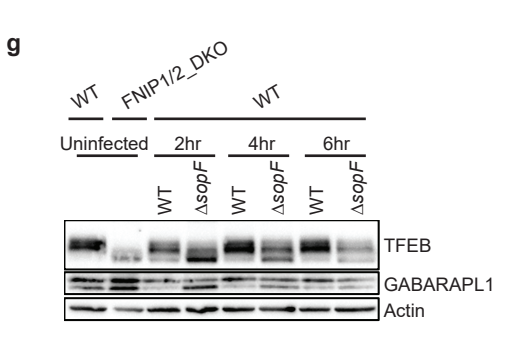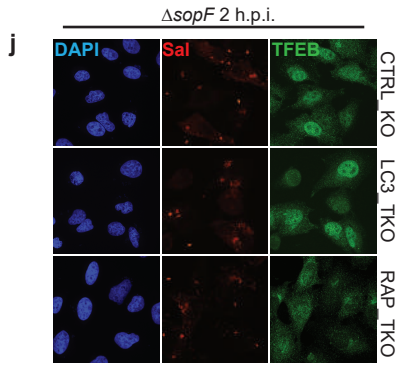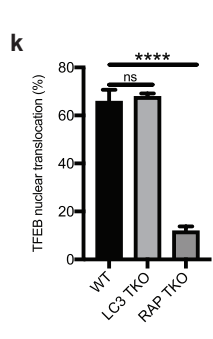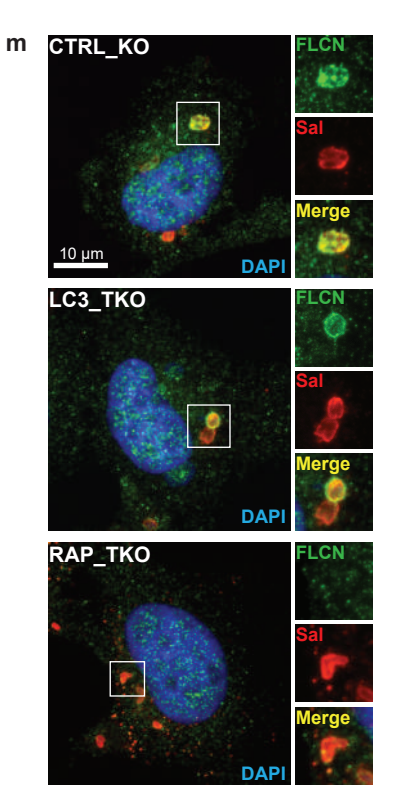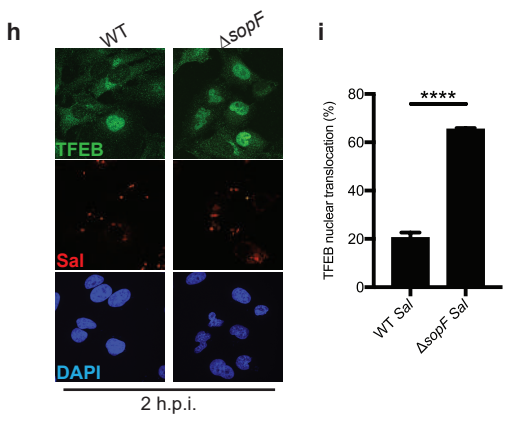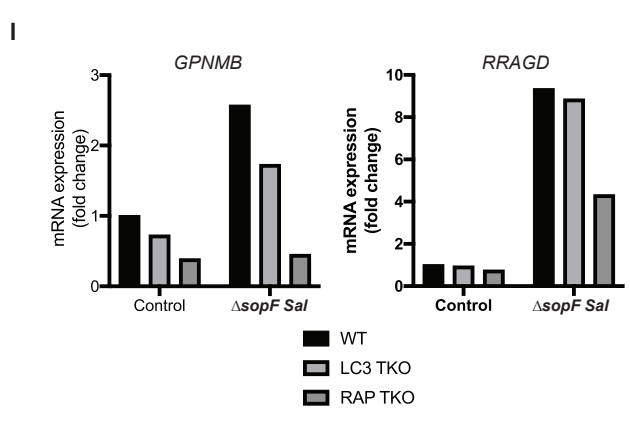



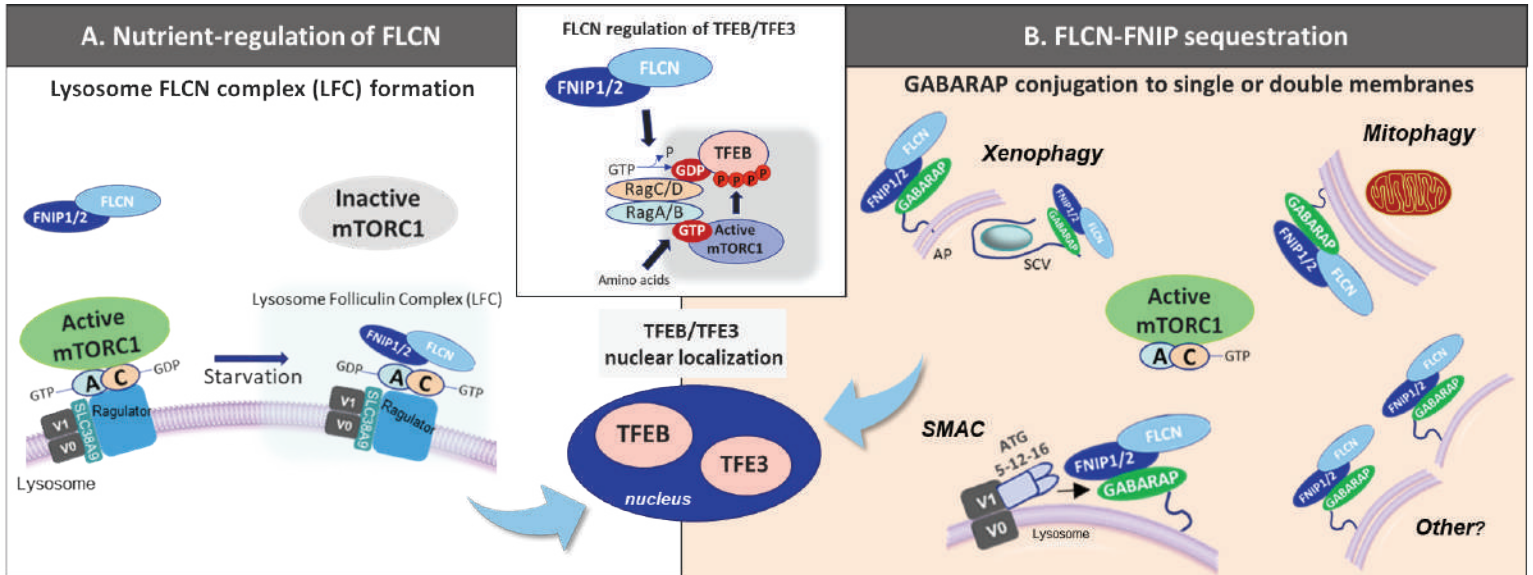

## **SUPPLEMENTARY MATERIAL**

**Supplementary movie S1. Time lapse imaging of GFP-LC3B puncta formation in HEK293T WT cells upon AZD8055 treatment.** Images taken at 2 minute intervals. AZD8055 = 1 $\mu$ M.

**Supplementary movie S2. Time lapse imaging of GFP-LC3B puncta formation in HEK293T WT cells upon C8 treatment.** Images taken at 2 minute intervals. C8 = 2 $\mu$ M.

**Supplementary movie S3. Reconstruction of FIB-SEM imaging in HEK293T WT cells upon AZD8055 treatment.** Ultrastructural analysis of colocalization events HEK293T WT cells stably expressing GFP-LC3B and LAMP1-RFP were imaged by correlative light electron microscopy. Image compilation for zoomed ROI.

**Supplementary movie S4. Reconstruction of FIB-SEM imaging in HEK293T ATG13\_KO cells upon C8 treatment.** Ultrastructural analysis of colocalization events HEK293T ATG13\_KO cells stably expressing GFP-LC3B and LAMP1-RFP were imaged by correlative light electron microscopy. Image compilation for zoomed ROI.

**Supplementary table 1. Data collection and refinement statistics (molecular replacement)**

**Supplementary table 2. Data collection, phasing and refinement statistics (MIR)**

**Supplementary table 3. Data collection, phasing and refinement statistics for MAD (SeMet) structures**

**Supplementary table 4. Rate constants for the modified peptides of FNIP2 and FLCN identified by carboxyl group footprinting.**

**Supplementary table 5. Rate constants for the three most modified residues in FNIP2.**

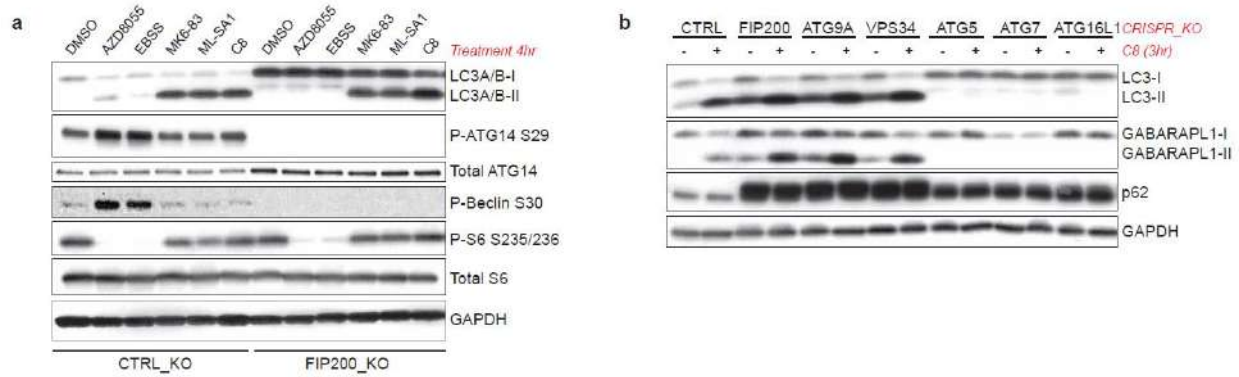

## FIGURE S1

**Supplementary figure 1. TRPML1 agonists stimulate ATG8 lipidation in autophagy-deficient cells. (a)** U2OS cells stably expressing Cas9 were deleted for the ULK1 complex component FIP200. Cells were then treated with the indicated compounds for 4 hr. P-ATG14 S29 and P-Bec1n S30 are specific ULK1-dependent phosphorylation sites. **(b)** HeLa cells stably expressing Cas9 were deleted for the indicated autophagy components and then treated with compound C8 (2uM) for 3hr. Lipidation of the ATG8 homologs LC3A/B and GABARAPL1 could be observed irrespective of autophagosome biogenesis.

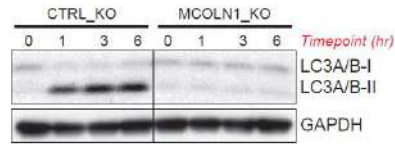

## FIGURE S2

**Supplementary figure 2. TRPML1 agonists induce rapid lipidation of LC3 through an on-target mechanism.** CRISPR knockout of TRPML1 in HeLa cells stably expressing Cas9 abolishes LC3-II induction upon TRPML1 agonist (C8) treatment.

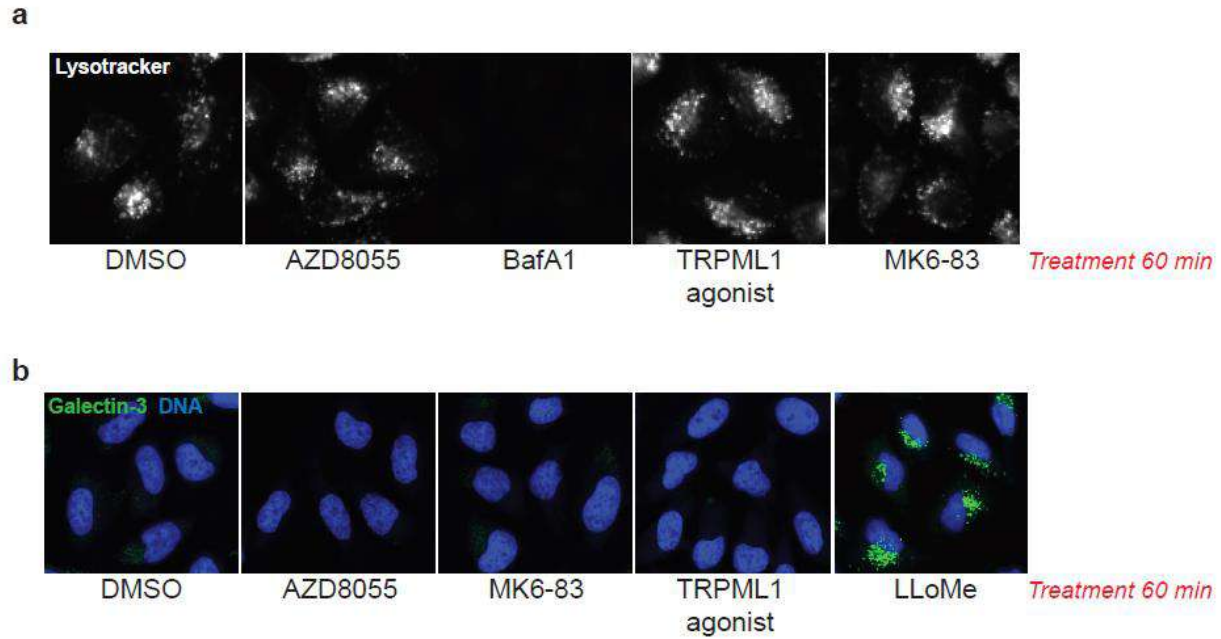

## FIGURE S3

**Supplementary figure 3. TRPML1 activation does not result in loss of the lysosomal pH gradient or membrane damage. (a)** HeLa cells were treated for 60 min with the indicated compounds and stained with the pH-sensitive Lysotracker dye. BafA1 serves as a positive control. Representative images are shown. **(b)** HeLa cells were treated for 60 min with the indicated compounds, fixed, and stained for immunofluorescence analysis of Galectin-3 puncta. LLoMe (1mM) served as a positive control. Representative images are shown.

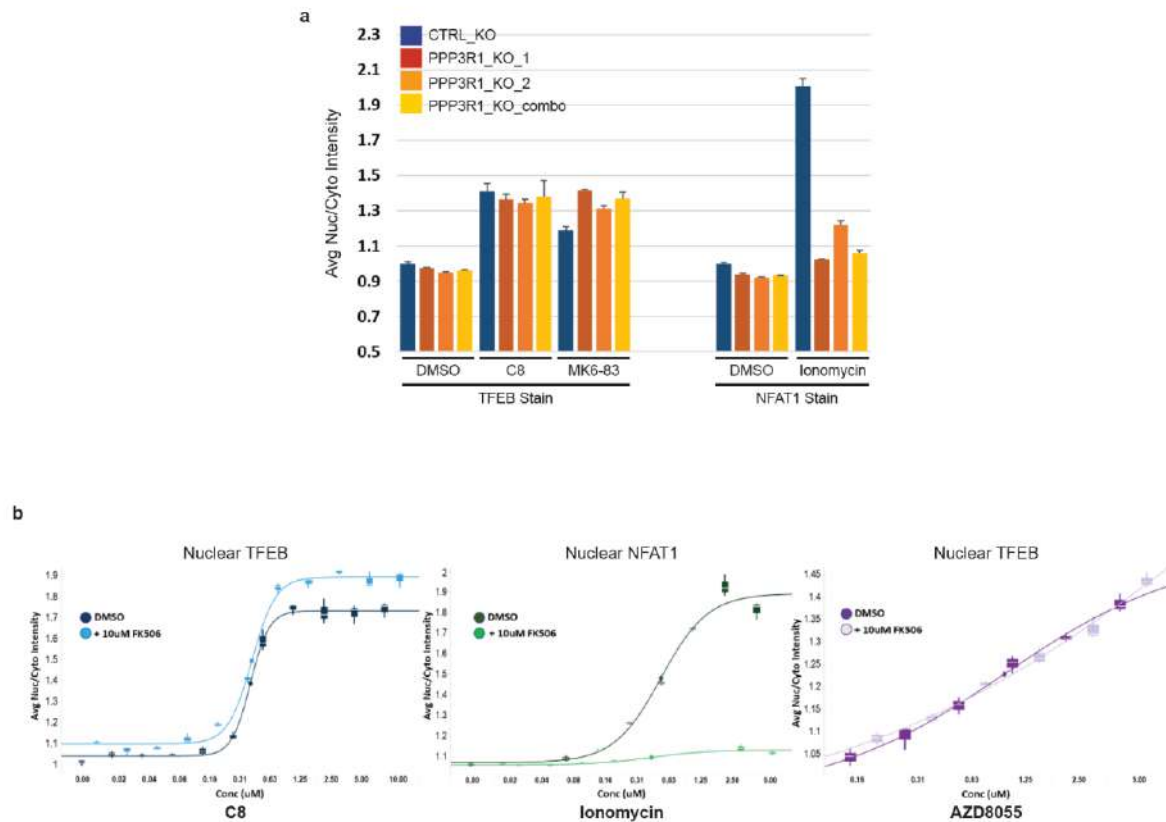

## FIGURE S4

**Supplementary figure 4. CRISPR knockout of the essential calcineurin (CaN) regulatory subunit PPP3R1 does not impact TFEB nuclear localization upon TRPML1 activation, yet does block activation of the canonical CaN substrate NFAT1 by ionomycin. (a)** HeLa cells stably expressing Cas9 were knocked out for PPP3R1 using CRISPR. PPP3R1\_KO\_1 and PPP3R1\_KO\_2 represent pooled population derived from distinct gRNA sequences. PPP3R1\_KO\_combo represents cell infected with both gRNA sequences. Cells were treated with the indicated compounds for 3 hours, fixed, and stained for endogenous TFEB or NFAT1. Analysis was performed using high content imaging. Mean  $\pm$  SD. Minimum of 1500 cells quantified per condition. **(b)** Dose response analysis of TFEB nuclear localization upon cotreatment with the CaN inhibitor FK-506. FK-506 did not impact nuclear TFEB upon TRPML1 agonist (C8) or AZD8055 treatment despite effective inhibition of CaN-mediated NFAT translocation upon ionomycin treatment. Cells were treated as in (A). Mean  $\pm$  SD. Minimum of 1500 cells quantified per condition.

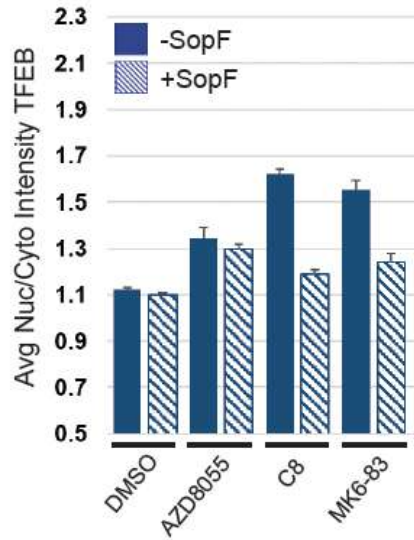

## FIGURE S5

**Supplementary figure 5.** HeLa cells expressing inducible-SopF were treated with the indicated compounds for 3 hr. DOX induction of SopF was begun 24 hr prior to compound treatment. Mean  $\pm$  SD. Minimum of 1500 cells quantified per condition.

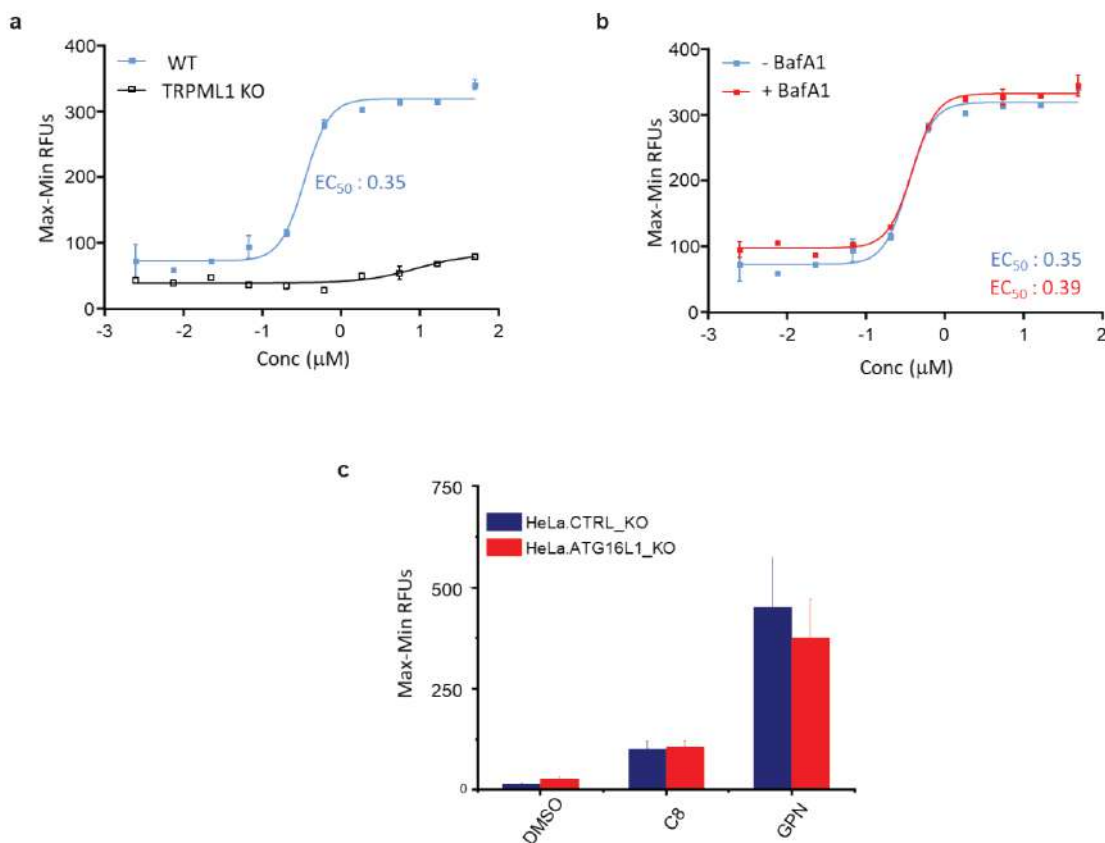

## FIGURE S6

**Supplementary figure 6. BafA1 treatment or ATG16L1 knockout does not affect TRPML1-dependent calcium release.** **(a)** Whole-cell calcium imaging in wild-type or TRPML1\_KO HeLa cells upon dose-response treatment with C8. Mean  $\pm$  SD plotted from three wells per datapoint. **(b)** BafA1 cotreatment (100nM) in wild-type HeLa cells upon dose response treatment with C8. Mean  $\pm$  SD plotted from three wells per datapoint. **(c)** ATG16L1 knockout does not impact C8 induced calcium release. GPN treatment shown to examine total lysosomal calcium content. Mean  $\pm$  SD plotted from three wells per datapoint.



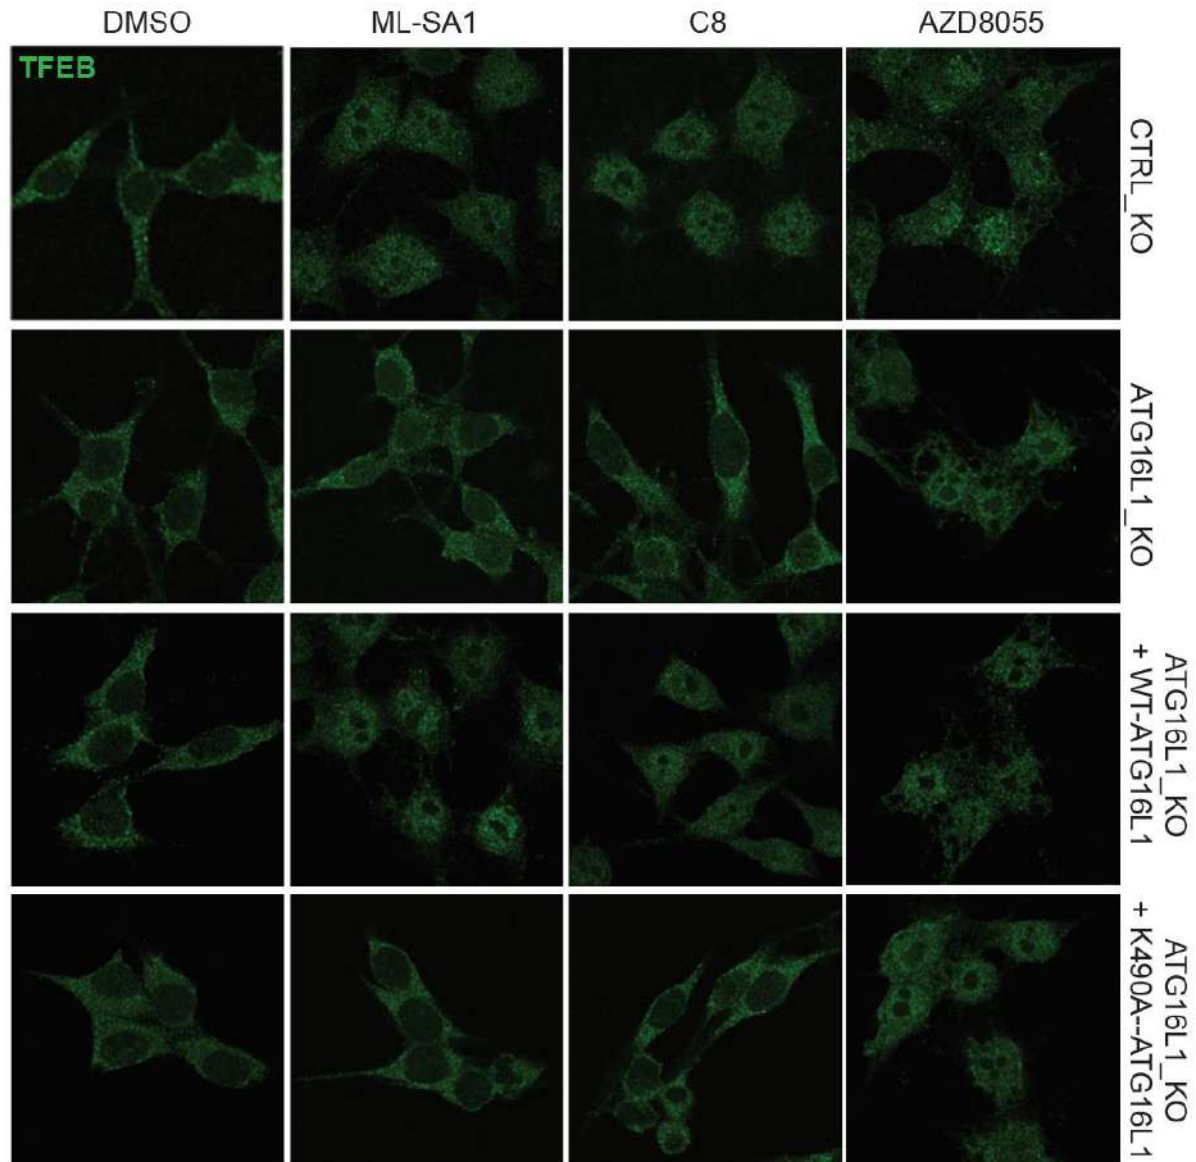

## FIGURE S7

**Supplementary figure 7. Single membrane ATG8 conjugation is required for TRPML1 agonist induced nuclear localization of TFEB.** RAW264.7 murine macrophages were genetically engineered to knockout endogenous ATG16L1 and reconstituted with either WT-ATG16L1 or K490A-ATG16L1. Cells were treated with the indicated compounds for 2 hours, fixed and stained for endogenous TFEB. Representative images are shown. AZD8055 effectively translocates TFEB in all lines, however the TRPML1 agonists only retain activity with competent ATG8 conjugation to single membranes.

80% of genes (381/471)  
induced by C8  
are ATG16L1 dependent  
(shown below)

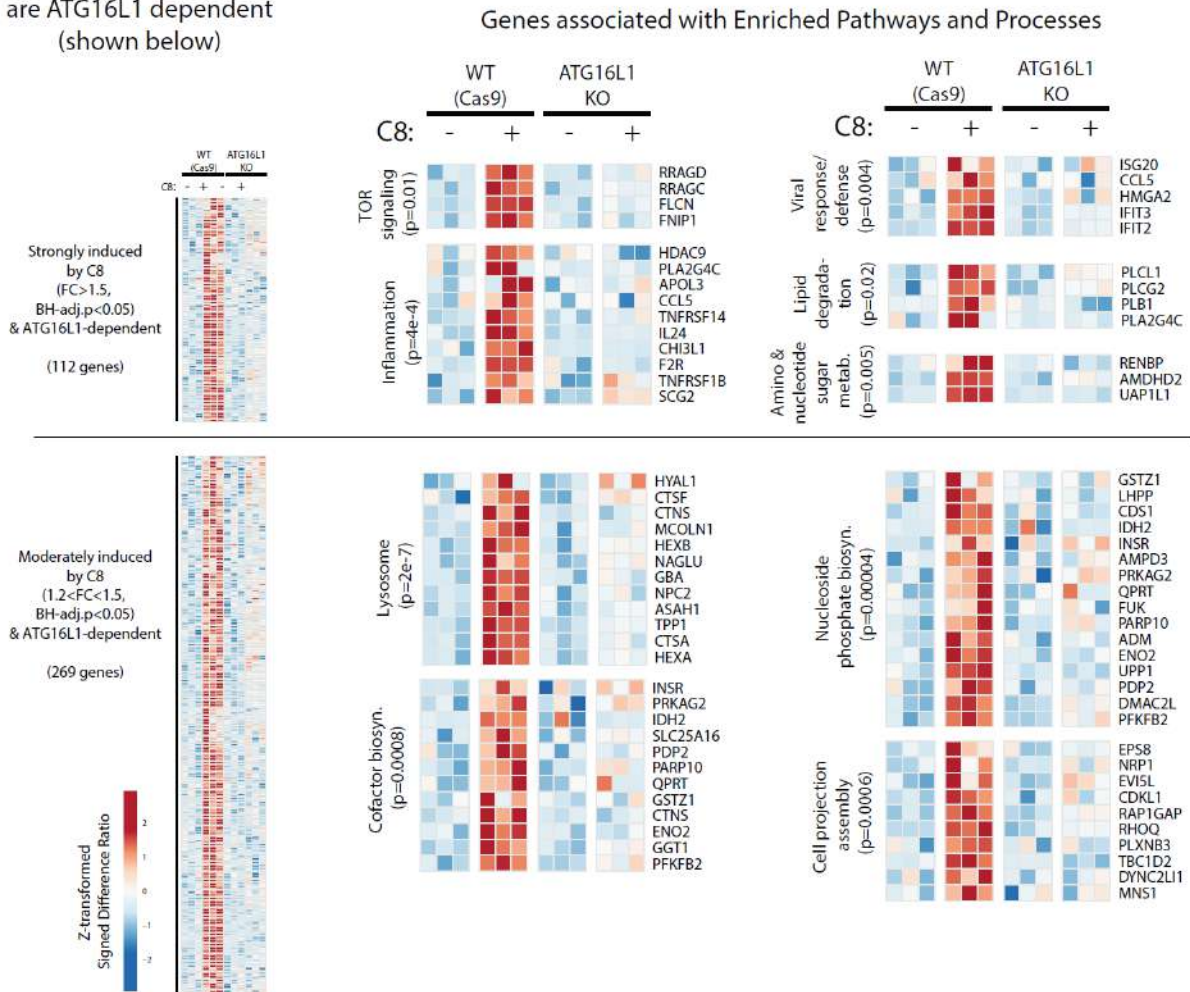

## FIGURE S8

**Supplementary figure 8. Representation of ATG16L1-dependent differentially expressed genes upon treatment with C8.** RNAseq transcriptomics profiling of genes induced by C8 compound stimulation for 24h in ATG16L1 KO and WT HeLa cells (expressing Cas9). The heatmap shows  $\text{Log}_2(\text{CPM})$ -derived values for these genes, expressed as Z-transformed signed difference ratios (SDR) relative to their respective unstimulated baseline controls (either ATG16L1 KO or WT) and then scaled by normalizing to the maximum absolute deviation of each gene's expression level from the unstimulated control. Differentially induced genes were identified by having a fold change (FC) > 1.5 and Benjamini and Hochberg's (BH)-adjusted  $p < 0.05$ . Genes were partitioned based of fold change. Strongly induced genes > 1.5 FC. Moderately induced genes 1.2-1.5 FC. Differentially induced genes were identified by having a Benjamini and Hochberg's (BH)-adjusted  $p < 0.05$ . Pathway enrichment analysis shows lysosomal genes are significantly increased in the moderate fraction upon C8 treatment (2uM for 24hr).

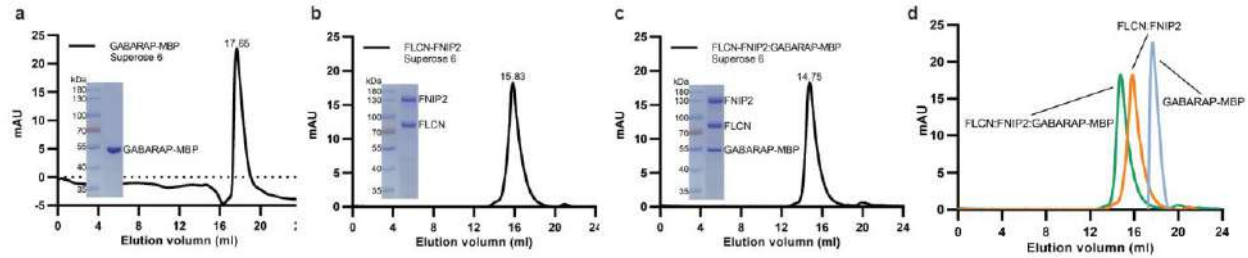

## FIGURE S9

**Supplementary figure 9. GABARAP\_MBP complexes with FLCN/FNIP2 over a Superose 6 column. (a)** Size exclusion chromatography elution profile of GABARAP\_MBP. **(b)** Size exclusion chromatography of Strep/Flag tagged FLCN/FNIP2. **(c)** Complexing and size exclusion profile of GABARAP\_MBP and Strep/Flag\_FLCN/FNIP2. **(d)** Overlay of individual and complexed chromatograms.

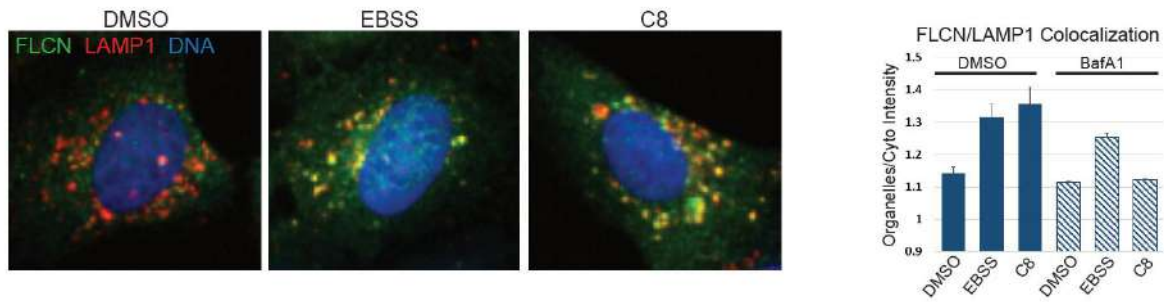

## FIGURE S10

### Supplementary figure 10. FLCN recruitment to lysosomes upon TRPML1 activation is sensitive to

### vATPase inhibition, unlike recruitment stimulated by nutrient starvation.

(a) Representative images of FLCN/LAMP1 colocalization upon EBSS or TRPML1 agonist treatment. (b) Quantification of FLCN/LAMP1 colocalization. Organelle masks were established on the endogenous LAMP1 staining and the intensity ratio of endogenous FLCN in the organelle/cytoplasm was measured using high content imaging. Mean  $\pm$  SD. Minimum of 1500 cells quantified per condition.

**a**

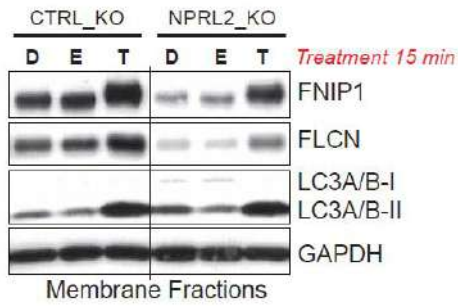

## FIGURE S11

**Supplementary figure 11. TRPML1 agonist regulates FLCN-FNIP membrane sequestration in LFC-deficient NPRL2\_KO cells (const. Raga<sup>GTP</sup>). (a)** Western blot analysis of FLCN-FNIP1 membrane recruitment upon TRPML1 agonist treatment or EBSS starvation in NPRL2\_KO cells.

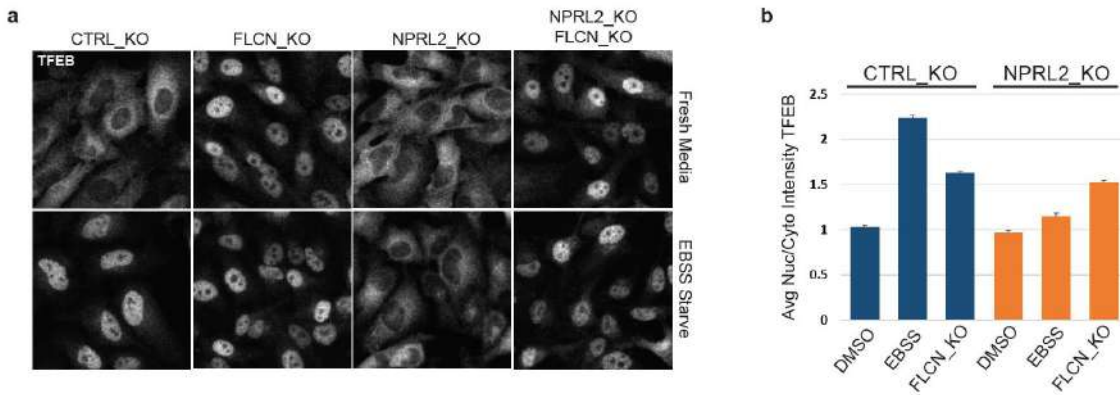

## FIGURE S12

**Supplementary figure 12. FLCN loss of function results in TFEB nuclear accumulation in WT and NPRL2\_KO cells. (a)** Immunofluorescence of TFEB localization in HeLa cells of the indicated genotypes with or without nutrient starvation (EBSS). **(b)** Quantification of immunofluorescence data from Figure 4I. Cells were starved with EBSS for 60 minutes. Nuclear localization of endogenous TFEB was analyzed by immunofluorescence and high content imaging. Mean  $\pm$  SD. Minimum of 1500 cells quantified per condition.



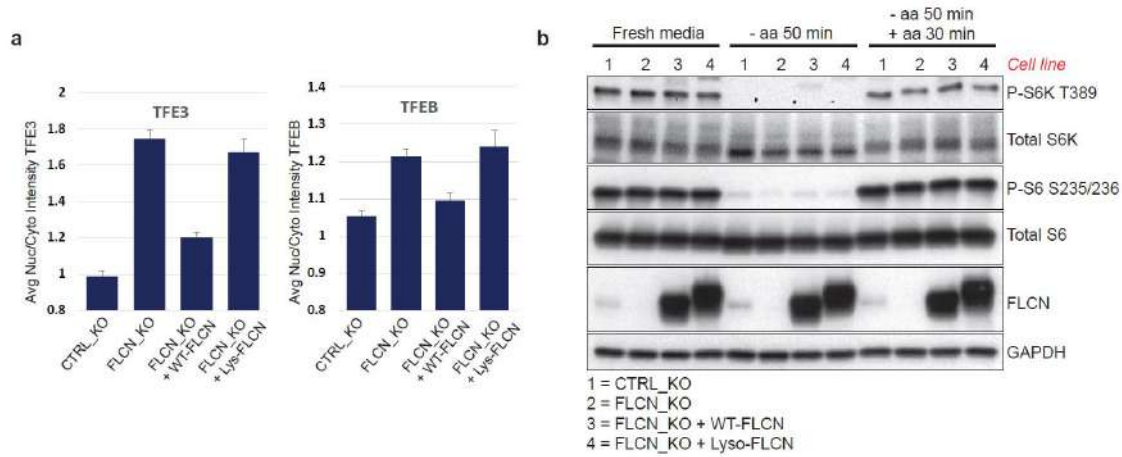

## FIGURE S13

**Supplementary figure 13. Forced lysosomal recruitment of FLCN activates TFEB/TFE3 in full nutrient conditions independent of mTOR. (a)** U2OS cells stably expressing Cas9 were genetically engineered to knockout endogenous FLCN and reconstituted with either WT- or lysosome-targeted-FLCN (N-terminal 39aa of LAMTOR1 fused to FLCN N-terminus). Expression of WT-FLCN, but not lyso-FLCN, is able to rescue TFEB/TFE3 cytosolic retention. Mean  $\pm$  SD. Minimum of 1500 cells quantified per condition. **(b)** FLCN status or localization does not impact mTOR signaling to canonical substrates in response to nutrient modulation, despite regulation of TFEB/TFE3 localization.



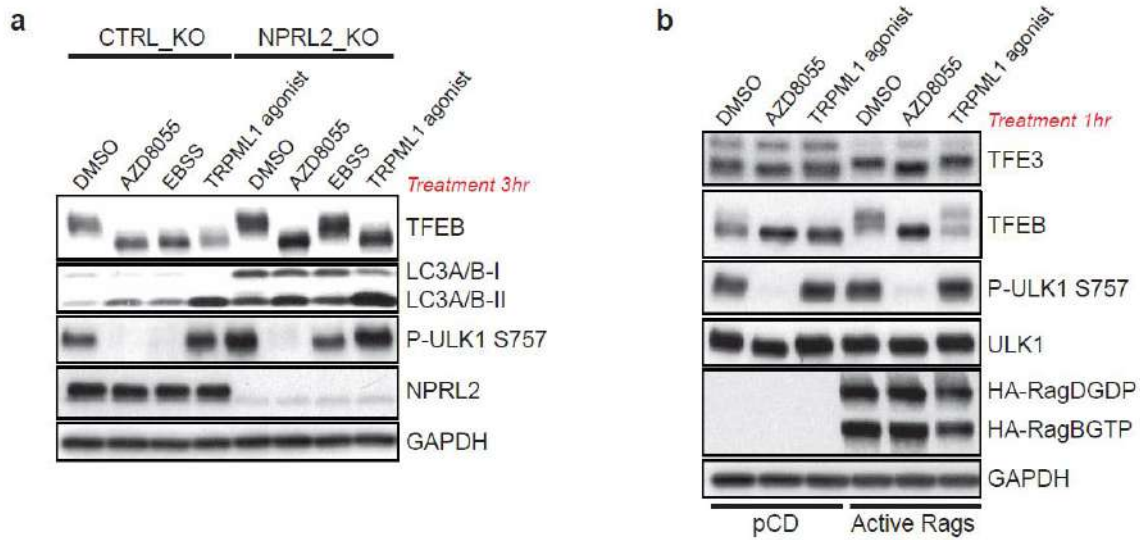

## FIGURE S14

**Supplementary figure 14. Constitutive RagD<sup>GDP</sup>, but not constitutive RagA<sup>GTP</sup>, suppresses TFEB activation by TRPML1 agonist.** (a) Western blot analysis of HeLa WT or NPRL2\_KO cells treated with the indicated stimuli. Constitutive RagA<sup>GTP</sup> (LFC-deficiency) suppresses TFEB activation by starvation but not TRPML1 agonist. (b) Western blot analysis of HEK293T cells transiently expressing constitutively active RagGTPases (RagB<sup>GTP</sup>/RagD<sup>GDP</sup>) and treated with the indicated compounds for 1hr.

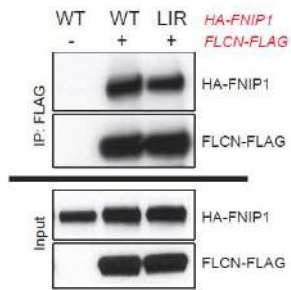

## FIGURE S15

**Supplementary figure 15.** Mutation of FNIP1 LIR motif does not impact binding to FLCN. HEK293T cells were transiently transfected with the indicated constructs 20 hr prior to immunoprecipitation.

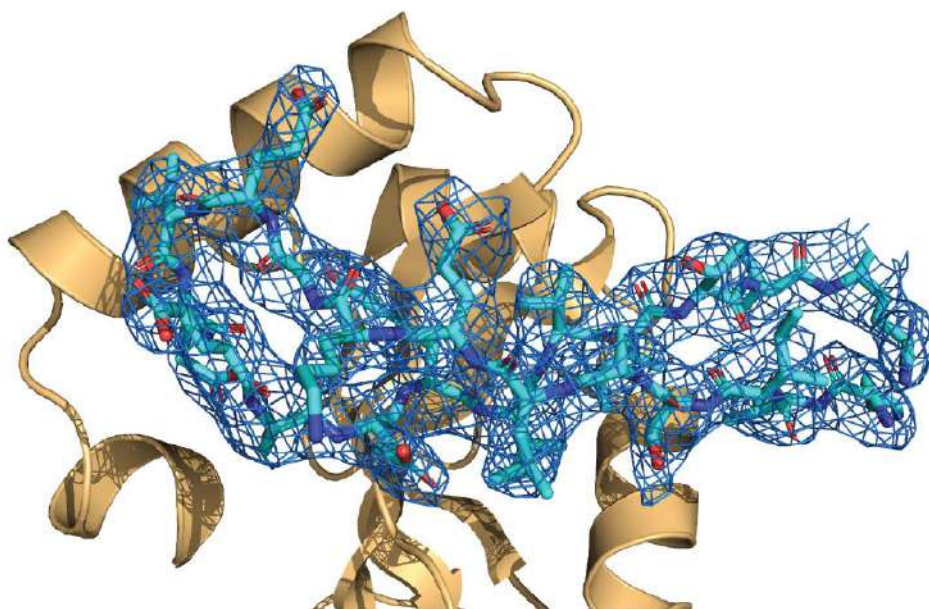

## FIGURE S16

**Supplemental figure 16.** The electron density for the region of FNIP2 is contoured at 1 sigma from the 2Fo-Fc map.

| FNIP 2 | I553            | I554            | T555            | A556            | L557            | D558           | K559           | G560           | E561           | V562           | E563           | E564           | S565           | D566           | T567           | T568           | V569           | I570           | T571           | V572           | R573           | N574           | E575           | P576           | P577            |
|--------|-----------------|-----------------|-----------------|-----------------|-----------------|----------------|----------------|----------------|----------------|----------------|----------------|----------------|----------------|----------------|----------------|----------------|----------------|----------------|----------------|----------------|----------------|----------------|----------------|----------------|-----------------|
| FNIP 1 |                 | T               |                 | T               |                 |                |                |                | I              |                |                |                |                |                |                |                | L              |                |                | M              | H              | R              | N              | K              | S               |
|        | X <sub>14</sub> | X <sub>13</sub> | X <sub>12</sub> | X <sub>11</sub> | X <sub>10</sub> | X <sub>9</sub> | X <sub>8</sub> | X <sub>7</sub> | X <sub>6</sub> | X <sub>5</sub> | X <sub>4</sub> | X <sub>3</sub> | X <sub>2</sub> | X <sub>1</sub> | X <sub>0</sub> | X <sub>1</sub> | X <sub>2</sub> | X <sub>3</sub> | X <sub>4</sub> | X <sub>5</sub> | X <sub>6</sub> | X <sub>7</sub> | X <sub>8</sub> | X <sub>9</sub> | X <sub>10</sub> |

## FIGURE S17

**Supplemental figure 16.** Sequence conservation between FNIP1 and FNIP2 surrounding the identified LIR motif.

| FNIP 2  | K552            | I553            | I554            | T555            | A556            | L557            | E558           | K559           | G560           | E561           | V562                     | E563             | E564           | S565           | D566           | T567           | V568                             | V569              | I570           | T571              | V572           | R573           | N574           | E575           | P576           |  |
|---------|-----------------|-----------------|-----------------|-----------------|-----------------|-----------------|----------------|----------------|----------------|----------------|--------------------------|------------------|----------------|----------------|----------------|----------------|----------------------------------|-------------------|----------------|-------------------|----------------|----------------|----------------|----------------|----------------|--|
| GEE     |                 |                 |                 |                 |                 |                 | *              |                |                |                |                          | *                | *              |                | *              |                |                                  |                   |                |                   |                |                |                |                |                |  |
|         | X <sub>15</sub> | X <sub>14</sub> | X <sub>13</sub> | X <sub>12</sub> | X <sub>11</sub> | X <sub>10</sub> | X <sub>9</sub> | X <sub>8</sub> | X <sub>7</sub> | X <sub>6</sub> | X <sub>5</sub>           | X <sub>4</sub>   | X <sub>3</sub> | X <sub>2</sub> | X <sub>1</sub> | X <sub>0</sub> | X <sub>1</sub>                   | X <sub>2</sub>    | X <sub>3</sub> | X <sub>4</sub>    | X <sub>5</sub> | X <sub>6</sub> | X <sub>7</sub> | X <sub>8</sub> | X <sub>9</sub> |  |
| GABARAP |                 |                 |                 |                 |                 |                 | K24<br>Q25     |                |                |                | E13<br>K13<br>S16<br>K20 | Y2<br>K48<br>F17 |                |                | E48            |                | L17<br>I21<br>K48<br>L50<br>F104 | K46<br>V49<br>R67 |                | F52<br>L55<br>I65 | R29            |                |                |                |                |  |
| LC3B    |                 |                 |                 |                 |                 |                 | Q26<br>I27     |                |                |                |                          | F7               |                |                |                |                |                                  |                   |                |                   | K30            |                |                |                |                |  |

## FIGURE S18

**Supplemental figure 17.** The region spanning 552-576 of FNIP2 was crystallized in complex with GABARAP. Glutamates protected by GEE-labelling are indicated with asterisks. Side chain-mediated interactions on GABARAP are indicated (red, salt bridge; blue, side chain:side chain hydrogen bond; green, main chain: side chain hydrogen bond; black, hydrophobic interactions). Key amino acid differences with LC3B as highlighted in Figure 4G, H are listed.

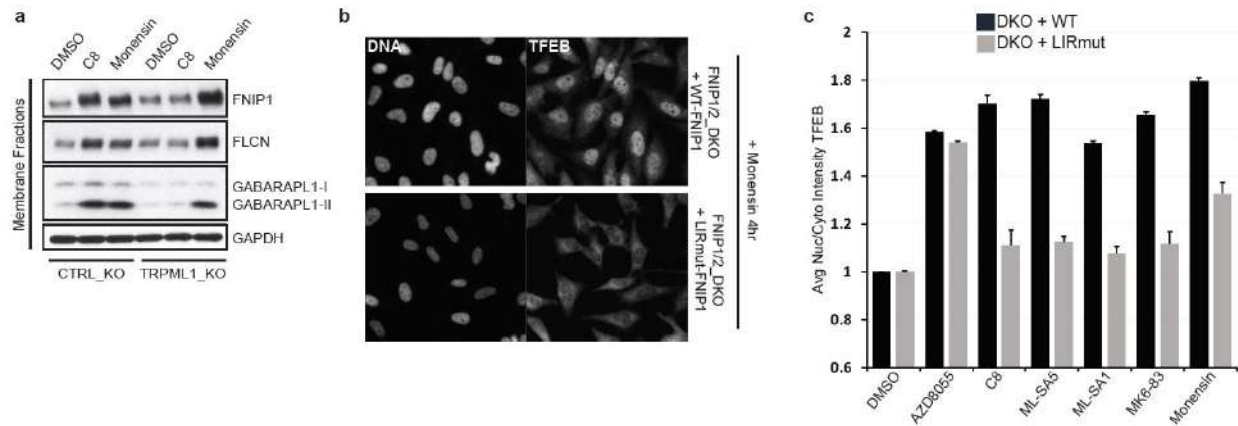

## FIGURE S19

**Supplemental figure 18. (a) Monensin treatment stimulates FLCN-FNIP recruitment to membrane fractions independent of TRPML1.** WT or TRPML1\_KO HeLa cells were treated with the indicated compounds for 30 min and membrane fractions were analyzed by western blot with the indicated antibodies. C8 (2uM). Monensin (1uM). **(b) TFEB nuclear localization upon monensin treatment requires FNIP1 LIR-mediated membrane sequestration.** Representative images of TFEB nuclear localization upon treatment of the indicated cell lines with monensin (1uM) for 4 hr. **(c) Quantification of TFEB nuclear localization upon treatment of the indicated cell lines for 4 hr with the annotated compounds.** AZD8055 (2uM), C8 (2uM), ML-SA5 (1uM), MK6-83 (25uM), and monensin (1uM). Mean  $\pm$  SD. Minimum of 1500 cells quantified per condition.

### Supplementary table 1. Data collection and refinement statistics (molecular replacement)

|                                                      | Crystal 1                   | Crystal 2 |
|------------------------------------------------------|-----------------------------|-----------|
| <b>Data collection</b>                               |                             |           |
| Space group                                          | P2(1)                       |           |
| Cell dimensions                                      |                             |           |
| <i>a</i> , <i>b</i> , <i>c</i> (Å)                   | 75.91, 44.75, 78.48         |           |
| $\alpha$ , $\beta$ , $\gamma$ (°)                    | 90.0, 118.5, 90.0           |           |
| Resolution (Å)                                       | 39.4 – 1.80 (1.84 – 1.80) * |           |
| <i>R</i> <sub>sym</sub> or <i>R</i> <sub>merge</sub> | 0.230 (0.716)               |           |
| <i>I</i> / $\sigma$ <i>I</i>                         | 10.7 (2.0)                  |           |
| Completeness (%)                                     | 97.5 (98.4)                 |           |
| Redundancy                                           | 2.8 (2.7)                   |           |
| <b>Refinement</b>                                    |                             |           |
| Resolution (Å)                                       | 39.5 – 1.80                 |           |
| No. reflections                                      | 39930                       |           |
| <i>R</i> <sub>work</sub> / <i>R</i> <sub>free</sub>  | 0.229 / 0.273               |           |
| No. atoms                                            |                             |           |
| Protein                                              | 3464                        |           |
| Ligand/ion                                           | 0                           |           |
| Water                                                | 408                         |           |
| <i>B</i> -factors                                    |                             |           |
| Protein                                              | 18.9                        |           |
| Ligand/ion                                           | 0                           |           |
| Water                                                | 35.2                        |           |
| R.m.s. deviations                                    |                             |           |
| Bond lengths (Å)                                     | 0.012                       |           |
| Bond angles (°)                                      | 1.69                        |           |

\*Values in parentheses are for highest-resolution shell.



**Supplementary table 2.** Data collection, phasing and refinement statistics (MIR)

|                                                      | Crystal 1 name       | Crystal 2 name |
|------------------------------------------------------|----------------------|----------------|
| <b>Data collection</b>                               |                      |                |
| Space group                                          |                      |                |
| Cell dimensions                                      |                      |                |
| <i>a</i> , <i>b</i> , <i>c</i> (Å)                   |                      |                |
| $\alpha$ , $\beta$ , $\gamma$ (°)                    |                      |                |
| Resolution (Å)                                       | ##(high res shell) * |                |
| <i>R</i> <sub>sym</sub> Or <i>R</i> <sub>merge</sub> | ##(high res shell)   |                |
| <i>I</i> / $\sigma$ <i>I</i>                         | ##(high res shell)   |                |
| Completeness (%)                                     | ##(high res shell)   |                |
| Redundancy                                           | ##(high res shell)   |                |
| <b>Refinement</b>                                    |                      |                |
| Resolution (Å)                                       |                      |                |
| No. reflections                                      |                      |                |
| <i>R</i> <sub>work</sub> / <i>R</i> <sub>free</sub>  |                      |                |
| No. atoms                                            |                      |                |
| Protein                                              |                      |                |
| Ligand/ion                                           |                      |                |
| Water                                                |                      |                |
| <i>B</i> -factors                                    |                      |                |
| Protein                                              |                      |                |
| Ligand/ion                                           |                      |                |
| Water                                                |                      |                |
| R.m.s deviations                                     |                      |                |
| Bond lengths (Å)                                     |                      |                |
| Bond angles (°)                                      |                      |                |

\*Number of xtals for each structure should be noted in footnote. \*Values in parentheses are for highest-resolution shell.

[AU: Equations defining various *R*-values are standard and hence are no longer defined in the footnotes.] [AU: Phasing data should be reported in Methods section.]

[AU: Ramachandran statistics should be in Methods section at end of Refinement subsection.]

[AU: Wavelength of data collection, temperature and beamline should all be in Methods section.]

**Supplementary table 3.** Data collection, phasing and refinement statistics for MAD (SeMet) structures

|                                                      | Native | Crystal 1 name |                   |               | Crystal 2 name |                   |               |
|------------------------------------------------------|--------|----------------|-------------------|---------------|----------------|-------------------|---------------|
| <b>Data collection</b>                               |        |                |                   |               |                |                   |               |
| Space group                                          |        | common #       |                   |               | common #       |                   |               |
| Cell dimensions                                      |        |                |                   |               |                |                   |               |
| <i>a, b, c</i> (Å)                                   |        | common #       |                   |               | common #       |                   |               |
| $\alpha, \beta, \gamma$ (°)                          |        | common #       |                   |               | common #       |                   |               |
|                                                      |        | <i>Peak</i>    | <i>Inflection</i> | <i>Remote</i> | <i>Peak</i>    | <i>Inflection</i> | <i>Remote</i> |
| Wavelength                                           |        | #              | #                 | #             | #              | #                 | #             |
| Resolution (Å)                                       |        | #              | #                 | #             | #              | #                 | #             |
| <i>R</i> <sub>sym</sub> OR <i>R</i> <sub>merge</sub> |        | #              | #                 | #             | #              | #                 | #             |
| <i>I</i> / $\sigma$ <i>I</i>                         |        | #              | #                 | #             | #              | #                 | #             |
| Completeness (%)                                     |        | #              | #                 | #             | #              | #                 | #             |
| Redundancy                                           |        | #              | #                 | #             | #              | #                 | #             |
| <b>Refinement</b>                                    |        |                |                   |               |                |                   |               |
| Resolution (Å)                                       |        | common #       |                   |               | common #       |                   |               |
| No. reflections                                      |        |                |                   |               |                |                   |               |
| <i>R</i> <sub>work</sub> / <i>R</i> <sub>free</sub>  |        |                |                   |               |                |                   |               |
| No. atoms                                            |        |                |                   |               |                |                   |               |
| Protein                                              |        |                |                   |               |                |                   |               |
| Ligand/ion                                           |        |                |                   |               |                |                   |               |
| Water                                                |        |                |                   |               |                |                   |               |
| <i>B</i> -factors                                    |        |                |                   |               |                |                   |               |
| Protein                                              |        |                |                   |               |                |                   |               |
| Ligand/ion                                           |        |                |                   |               |                |                   |               |
| Water                                                |        |                |                   |               |                |                   |               |

---

R.m.s deviations

Bond lengths (Å)

Bond angles (°)

---

\*Number of xtals for each structure should be noted in footnote. \*Values in parentheses are for highest-resolution shell.

[AU: Equations defining various *R*-values are standard and hence are no longer defined in the footnotes.]

[AU: Phasing data should be reported in Methods section.]

[AU: Ramachandran statistics should be in Methods section at end of Refinement subsection.]

[AU: Wavelength of data collection, temperature and beamline should all be in Methods section.]

(a)

| Location | Sequence<br>FNIP2           | Modification<br>rate, $\times 10^{-5}$<br>$K_{\text{free}}$ | Modification<br>rate, $\times 10^{-5}$<br>$K_{\text{complex}}$ | Ratio<br>$K_{\text{free}}/K_{\text{complex}}$ |
|----------|-----------------------------|-------------------------------------------------------------|----------------------------------------------------------------|-----------------------------------------------|
| 31-42    | EGPAFSWSCSEF                | $10.57 \pm 0.49$                                            | $11.97 \pm 0.27$                                               | 0.88                                          |
| 43-48    | DLNEIR                      | $42.46 \pm 1.55$                                            | $44.64 \pm 0.57$                                               | 0.95                                          |
| 72-79    | IEEVTAQK                    | $29.27 \pm 8.45$                                            | $32.94 \pm 9.61$                                               | 0.89                                          |
| 80-86    | TEDVPIK                     | $303 \pm 29.97$                                             | $370 \pm 9.90$                                                 | 0.82                                          |
| 188-195  | DSFEYINQ                    | $78.69 \pm 1.06$                                            | $168 \pm 15.61$                                                | 0.47                                          |
| 214-229  | TGSNLAHSTPVDMP<br>SR        | $203 \pm 33.45$                                             | $214 \pm 1.21$                                                 | 0.95                                          |
| 273-285  | SQTTSLengiIPR               | $3.4 \pm 0.31$                                              | $4.03 \pm 0.07$                                                | 0.84                                          |
| 289-295  | DETFSLA                     | $35.77 \pm 7.82$                                            | $22.90 \pm 8.20$                                               | 1.56                                          |
| 296-307  | EETCSSNPAMVR                | $15.03 \pm 2.68$                                            | $14.88 \pm 1.32$                                               | 1.01                                          |
| 331-346  | DFFFSHFPLFESHMNR            | $3.44 \pm 0.20$                                             | $2.40 \pm 0.42$                                                | 1.43                                          |
| 361-367  | IAESSLR                     | $1.30 \pm 0.18$                                             | $1.15 \pm 0.24$                                                | 1.13                                          |
| 375-383  | LMEALGEFR                   | $12.19 \pm 0.45$                                            | $11.10 \pm 0.83$                                               | 1.10                                          |
| 395-410  | IAEPVWLTMMSGTLEK            | $12.12 \pm 3.47$                                            | $10.92 \pm 1.30$                                               | 1.11                                          |
| 420-430  | EFTLLIEQINK                 | $1.25 \pm 0.027$                                            | $1.58 \pm 0.13$                                                | 0.79                                          |
| 478-500  | THPYNPLWAQLGDLY<br>GAIGSPVR | $85.95 \pm 23.13$                                           | $78.11 \pm 22.65$                                              | 1.10                                          |
| 527-544  | CSELQENQLTWSGNH<br>GEG      | $47.82 \pm 6.56$                                            | $65.90 \pm 5.11$                                               | 0.73                                          |
| 532-552  | ENQLTWSGNHGED<br>QVLNGSK    | $195 \pm 40.93$                                             | $206 \pm 32.48$                                                | 0.95                                          |
| 553-559  | IITALEK                     | $6.29 \pm 0.24$                                             | $3.69 \pm 0.34$                                                | 1.70                                          |
| 560-573  | GEVEESEYVVITVR              | $36.46 \pm 1.65$                                            | $16.53 \pm 1.79$                                               | 2.21                                          |
| 564-573  | ESEYVVITVR                  | $8.02 \pm 0.25$                                             | $1.39 \pm 0.074$                                               | 5.77                                          |
| 574-590  | NEPALVPPILPPTAAER           | $7.41 \pm 0.26$                                             | $12.56 \pm 0.47$                                               | 0.59                                          |
| 591-605  | HNPWPTGFPECPEGT             | $7.35 \pm 0.88$                                             | $6.75 \pm 0.34$                                                | 1.09                                          |
| 609-616  | DLGLKPKDK                   | $5.04 \pm 0.45$                                             | $4.26 \pm 0.46$                                                | 1.18                                          |
| 621-638  | RPEQGSEACSGCLG<br>PAS       | $5.57 \pm 0.66$                                             | $5.24 \pm 0.52$                                                | 1.06                                          |
| 665-676  | LPSCEVLGAGMK                | $7.52 \pm 0.29$                                             | $10.59 \pm 1.92$                                               | 0.71                                          |

|           |                              |               |               |      |
|-----------|------------------------------|---------------|---------------|------|
| 678-687   | DQQAVCELLK                   | 48.23 ± 14.49 | 65.46 ± 4.15  | 0.74 |
| 698-706   | SVAWPCPDR                    | 42.21 ± 3.65  | 47.79 ± 4.67  | 0.88 |
| 710-716   | EKPSLEK                      | 382 ± 40.31   | 370 ± 36.95   | 1.03 |
| 717-729   | VTFQIGSFASPES                | 11.46 ± 0.99  | 8.31 ± 0.57   | 1.38 |
| 717-734   | VTFQIGSFASPESDFE<br>SR       | 52.86 ± 5.04  | 38.99 ± 2.35  | 1.36 |
| 744-755   | ACGPSLEASEAA                 | 40.86 ± 1.60  | 46.72 ± 1.40  | 0.87 |
| 770-782   | PGFQENVCCPQNR                | 3.93 ± 0.94   | 3.48 ± 0.26   | 1.13 |
| 808-817   | DIAGQLSHAA                   | 0.34 ± 0.14   | 0.35 ± 0.07   | 0.97 |
| 808-832   | DIAGQLSHAADLGTA<br>HGAGGTGGR | 54.79 ± 1.58  | 92.09 ± 15.86 | 0.59 |
| 844-856   | AAEGPVLEPVAPR                | 22.44 ± 0.45  | 38.49 ± 3.18  | 0.58 |
| 846-856   | EGPVLEPVAPR                  | 13.42 ± 0.69  | 18.06 ± 0.78  | 0.74 |
| 883-889   | TEGDIPR                      | 1260 ± 338    | 1441 ± 427    | 0.87 |
| 902-910   | DEACASAML                    | 23.86 ± 4.40  | 27.51 ± 3.52  | 0.87 |
| 919-931   | TGGSLEVELPLPR                | 4.34 ± 0.56   | 4.67 ± 0.15   | 0.93 |
| 924-931   | EVELPLPR                     | 7.31 ± 0.59   | 6.84 ± 0.33   | 1.07 |
| 958-969   | DLVLHGTGSDEK                 | 58.42 ± 7.96  | 78.14 ± 11.01 | 0.75 |
| 972-987   | QCLVADLVHTVHHPVL             | 74.92 ± 2.41  | 111 ± 13.84   | 0.67 |
| 988-999   | DEPIAEAVCIIA                 | 9.97 ± 0.96   | 12.84 ± 1.01  | 0.78 |
| 1021-1043 | LGQDVLVSSQVSSLLQ<br>SILQLYK  | 13.34 ± 1.42  | 14.08 ± 2.05  | 0.95 |
| 1049-1056 | DFCIMHLE                     | 0.61 ± 0.074  | 0.45 ± 0.13   | 1.36 |
| 1068-1074 | MLSEYLR                      | 1.41 ± 0.01   | 1.69 ± 0.30   | 0.83 |
| 1083-1093 | ELGVVLGIESN                  | 13.91 ± 1.35  | 13.03 ± 1.50  | 1.07 |
| 1094-1114 | DLPLLTAIASTHSPYVA<br>QILL    | 2.56 ± 0.33   | 2.10 ± 0.35   | 1.22 |



(b)

| Location | Sequence<br>FLCN                | Modification<br>rate, $\times 10^{-5}$<br>$K_{\text{free}}$ | Modification<br>rate, $\times 10^{-5}$<br>$K_{\text{complex}}$ | Ratio<br>$K_{\text{free}}/K_{\text{complex}}$ |
|----------|---------------------------------|-------------------------------------------------------------|----------------------------------------------------------------|-----------------------------------------------|
| 20-34    | TLFCTEVLHAPLPQG                 | $0.83 \pm 0.14$                                             | $1.23 \pm 0.07$                                                | 0.67                                          |
| 25-38    | EVLHAPLPQGDGNE                  | $113 \pm 11.4$                                              | $137 \pm 18.73$                                                | 0.82                                          |
| 49-59    | EEEGGIQMNSR                     | $69.80 \pm 6.38$                                            | $68.05 \pm 3.61$                                               | 1.03                                          |
| 62-79    | AHSPAEGASVESSSP<br>GPK          | $5.16 \pm 0.55$                                             | $7.44 \pm 0.80$                                                | 0.69                                          |
| 67-79    | EGASVESSSPGPK                   | $5.05 \pm 0.14$                                             | $5.16 \pm 0.37$                                                | 0.98                                          |
| 89-102   | SLAAGHPGYISHDK                  | $4.66 \pm 1.43$                                             | $5.70 \pm 2.02$                                                | 0.82                                          |
| 130-139  | SLSCEVCPGR                      | $204 \pm 2.30$                                              | $162 \pm 7.49$                                                 | 1.26                                          |
| 140-146  | EGPIFFG                         | $85.94 \pm 16.09$                                           | $82.97 \pm 13.13$                                              | 1.04                                          |
| 147-161  | DEQHGFVFSHTFFIK                 | $2.29 \pm 0.16$                                             | $2.40 \pm 0.15$                                                | 0.95                                          |
| 167-194  | GFQRWYSIITIMMDRIY<br>LINSWPFLGK | $38.86 \pm 5.89$                                            | $33.42 \pm 7.61$                                               | 1.16                                          |
| 171-194  | WYSIITIMMDRIYLINS<br>WPFLGK     | $2.05 \pm 0.42$                                             | $1.53 \pm 0.48$                                                | 1.34                                          |
| 197-205  | GIIDELQGK                       | $1181 \pm 689$                                              | $1131 \pm 0.48$                                                | 1.04                                          |
| 209-220  | VFEAEQFGCPQR                    | $35.97 \pm 2.24$                                            | $33.46 \pm 4.46$                                               | 1.08                                          |
| 249-265  | DDNLWACLHTSFAWL<br>LK           | $2.25 \pm 0.46$                                             | $3.25 \pm 1.02$                                                | 0.69                                          |
| 275-290  | LLEGAPTEDTLVQMEK                | $238 \pm 50.66$                                             | $166 \pm 21.21$                                                | 1.43                                          |
| 283-290  | DTLVQMEK                        | $13.84 \pm 1.04$                                            | $9.74 \pm 0.71$                                                | 1.42                                          |
| 293-301  | DLEEESESW                       | $131 \pm 7.98$                                              | $123 \pm 4.87$                                                 | 1.07                                          |
| 312-322  | APVLPESTEGR                     | $12.93 \pm 0.14$                                            | $16.25 \pm 0.72$                                               | 0.80                                          |
| 323-343  | ELTQGPAESSLSLGC<br>GSWQPR       | $12.14 \pm 0.20$                                            | $11.43 \pm 0.65$                                               | 1.06                                          |
| 380-394  | SRDVDLVQSAFEVLR                 | $3.16 \pm 0.50$                                             | $3.91 \pm 1.03$                                                | 0.81                                          |
| 382-390  | DVDLVQSAF                       | $199 \pm 18.63$                                             | $215 \pm 51.25$                                                | 0.93                                          |
| 382-394  | DVDLVQSAFEVLR                   | $6.64 \pm 2.62$                                             | $6.67 \pm 0.95$                                                | 0.95                                          |
| 404-412  | IIPYSSQYE                       | $35.43 \pm 2.98$                                            | $35.79 \pm 1.88$                                               | 0.99                                          |
| 449-457  | STLHPVGCE                       | $4.76 \pm 0.74$                                             | $4.02 \pm 0.19$                                                | 1.18                                          |
| 449-458  | STLHPVGCED                      | $7.03 \pm 1.69$                                             | $8.07 \pm 1.0$                                                 | 0.87                                          |

|         |                 |                  |                  |      |
|---------|-----------------|------------------|------------------|------|
| 465-477 | YEFVVTSGSPVAA   | $5.04 \pm 0.56$  | $5.59 \pm 0.46$  | 0.90 |
| 465-479 | YEFVVTSGSPVAADR | $224 \pm 27.23$  | $184 \pm 24.36$  | 1.22 |
| 488-499 | IEAALTNQNLSV    | $1.42 \pm 0.20$  | $1.66 \pm 0.18$  | 0.86 |
| 500-510 | DVVDQCLVCLK     | $221 \pm 9.19$   | $207 \pm 19.21$  | 1.31 |
| 511-516 | EEWMNK          | $9.22 \pm 1.74$  | $8.34 \pm 1.06$  | 1.11 |
| 537-546 | LLSILGASEE      | $15.28 \pm 1.95$ | $16.87 \pm 1.75$ | 0.91 |
| 581-587 | NLEVLFQ         | $17.67 \pm 2.39$ | $20.87 \pm 3.21$ | 0.85 |

## TABLE S4

### Supplementary table 4. Rate constants for the modified peptides of FNIP2 and FLCN identified by carboxyl group Footprinting.

The highest protection ratios ( $R$ ) are highlighted in yellow for peptides derived from (a) FNIP2 and (b) FLCN. Modestly protected peptides are highlighted in grey. Three peptides from FNIP2 that cover 553-559, 560-573 and 564-573 exhibited the highest protection ratios of 1.70, 2.21 and 5.77, respectively, while two peptides covering 286-295 and 331-346 showed more modest protection ratios of 1.56 and 1.43, respectively. For FLCN, two peptides covering 275-290 and 283-290 showed modest protection ratios of 1.43 and 1.42, respectively. MS data from one replicate experiment were used to calculate  $K$  values for each peptide. The overall fit results for all detected peptides within (a) FNIP2 and (b) FLCN are shown. Peptide locations and their corresponding sequences are shown in columns 1 and 2. The third and fourth columns denote the  $K$  values for free FLCN/FNIP2 ( $K_{\text{free}}$ ) and the complex with GABARAP ( $K_{\text{complex}}$ ), respectively. The fifth column shows the ratio,  $R = K_{\text{free}}/K_{\text{complex}}$ . For a given peptide,  $R < 1$  suggests that the corresponding region experienced a gain in solvent accessibility due to structural changes introduced during complex formation. A  $R$  value close to 1 indicates that the solvent accessibility of the region remains unchanged, while a  $R > 1$  suggests that the corresponding region exhibits protection from the solvent as a function of the complex formation. The  $R$  values for all of the peptides (column five) fell between 0.47 and 5.77 with a mean value of 1.06 and a median value of 0.95. The histogram of the distribution of  $R$  values (Fig. 3B) for all peptides also indicated that a majority of the peptides within FLCN/FNIP2 exhibited changes in modification upon complex formation close to 1. Using a strategy similar to one used in metabolomics to correct for non-biological variations between samples (mean scaling, division by central tendency), we used the average of the mean and the median to normalize the ratios to 1. A normalization factor for these studies was calculated to be  $1 = ((1.05+0.95)/2)$ .

| Location | Modified Residues FNIP2 | Modification rate, $\times 10^{-5}$ $K_{\text{free}}$ | Modification rate, $\times 10^{-5}$ $K_{\text{complex}}$ | Ratio $K_{\text{free}}/K_{\text{complex}}$ |
|----------|-------------------------|-------------------------------------------------------|----------------------------------------------------------|--------------------------------------------|
| 553-559  | E558                    | $6.29 \pm 0.24$                                       | $3.69 \pm 0.34$                                          | 1.70                                       |
| 560-573  | E561&E564               | $21.19 \pm 0.69$                                      | $7.36 \pm 1.11$                                          | 2.88                                       |
|          | E561                    | $6.17 \pm 0.56$                                       | $5.53 \pm 1.01$                                          | 1.12                                       |
|          | E563                    | $1.32 \pm 0.32$                                       | $0.44 \pm 0.087$                                         | 3.00                                       |
| 564-573  | E566                    | $8.02 \pm 0.25$                                       | $1.39 \pm 0.074$                                         | 5.77                                       |

## TABLE S5

### Supplementary table 5. Rate constants for the three most modified residues in FNIP2.

Residues E558, E564, E563 and E566 (within peptides 553-559, 560-573 and 564-573) showed the highest protection of 1.70, 2.88, 3.0 and 5.77, respectively, upon complex formation. Peptides were derived from trypsin/Asp-N digestion.
